# Supplementary material
Source: MDPI journal article supplement (https://www.mdpi.com/2071-1050/15/17/13194)
Supplement: s1 [file covips_SOM1.pdf › final SOM/covips_SOM1.pdf]

# Covid-19 crisis in perspective

This study's aim is to measure your **impressions** during the **current Covid-19 crisis** and to put them into perspective with your perceptions of **climate change**.

Your participation in this study is completely **anonymous** : we will not be able to link your answers back to you. Furthermore, there are no right or wrong answers. Consequently, we ask you to answer with **what you believe** is the truth in the most **direct and honest** way possible. You are totally free not to answer one or more questions and you can withdraw your participation at any time during the study. If you answer this questionnaire, you **consent** that your data will be used for **research purposes** only.

In advance, an enormous **thank you** for your participation. It is vital to understand the consequences of the crisis we are living.

COVIPS study (covips@unil.ch) – Social psychology laboratory, University of Lausanne (Switzerland)

There are 33 questions in this survey

## Socio-demographic information

[]

**We will first of all ask you some questions about yourself. These are not linked to the current situation. Thus, we would like to ascertain whether our population is representative.**

### What is your gender ?

\*

Please choose **only one** of the following:

- ☐ Woman
- ☐ Man
- ☐ Other

[ ]

**What is your age?**

\*

Only numbers may be entered in this field.

Please write your answer here:

•

**[ ]Warning : this questionnaire is directed at people that are 18 and older.**

**If you are not yet 18 years of age, please do not continue this study as it will hinder the relevance of the data collected.**

Only answer this question if the following conditions are met:  
Answer was less than '18' at question '2 [age]' ( What is your age? )

**[ ]What is/are your nationality(ies)?**

Please write your answer here:

**[ ]Which county do you live in?**

Please write your answer here:

**[ ]In which kind of accommodation do you live in?**

Please choose **only one** of the following:

- ☐ Individual House (or terraced houses)
- ☐ Apartment with no balcony
- ☐ Apartment with garden (and balcony if one)
- ☐ Apartment with balcony(ies)
- ☐ Other

**[ ]What is your principal occupation?**

Please choose **only one** of the following:

- ☐ Full time employment (90% and more)
- ☐ Partial employment (between 50% and 90%)
- ☐ Partial employment (less than 50%)
- ☐ In education
- ☐ At home
- ☐ Retired
- ☐ Looking for employment
- ☐ Other

**[ ]What is the highest level of education that you have obtained (if you are currently in education you can select that one; e.g. if you are completing a Msc. you can select Msc.)?**

Please choose **only one** of the following:

- ☐ Compulsory education
- ☐ Apprenticeship or equivalent
- ☐ A-levels
- ☐ Professional higher education certificate or diploma
- ☐ Higher education degree (university, etc.)
- ☐ Other

**[ ]What is your political orientation?**

Please choose the appropriate response for each item:

- Far leftwing      1      2      3      4      5      6      far rightwing

## Values+desirability

[ ]

**We would like you to tell us how important it is for you ...**

Please choose the appropriate response for each item:

[illegible]

[ ]

Please choose the appropriate response for each item:

[illegible]



[illegible]

|                                                                                                                                       | 1<br>(completely<br>disagree) | 2                     | 3                     | 4                     | 5                     | 6<br>(completely<br>agree) |
|---------------------------------------------------------------------------------------------------------------------------------------|-------------------------------|-----------------------|-----------------------|-----------------------|-----------------------|----------------------------|
| crisis<br>converge                                                                                                                    |                               |                       |                       |                       |                       |                            |
| One can<br>read very<br>different<br>opinions<br>about the<br>Covid-19<br>crisis in<br>the media                                      | <input type="radio"/>         | <input type="radio"/> | <input type="radio"/> | <input type="radio"/> | <input type="radio"/> | <input type="radio"/>      |
| Certain<br>scientific<br>and<br>political<br>people<br>seem to<br>disagree<br>on<br>opinions<br>concerning<br>the Covid-<br>19 crisis | <input type="radio"/>         | <input type="radio"/> | <input type="radio"/> | <input type="radio"/> | <input type="radio"/> | <input type="radio"/>      |
| Public<br>authority<br>messages<br>concerning<br>the Covid-<br>19 crisis<br>are very<br>clear                                         | <input type="radio"/>         | <input type="radio"/> | <input type="radio"/> | <input type="radio"/> | <input type="radio"/> | <input type="radio"/>      |

## Health and covid-19

[ ]

**We will now ask you some questions about your health as well as that of your relatives (friends and family) linked to the Covid-19 crisis.**

### How would you describe your health in general?

Please choose the appropriate response for each item:



|                                            | 1 (very bad)          | 2                     | 3                     | 4                     | 5                     | 6 (very good)         |
|--------------------------------------------|-----------------------|-----------------------|-----------------------|-----------------------|-----------------------|-----------------------|
| Before the Covid-19 crisis                 | <input type="radio"/> |
| Since the beginning of the Covid-19 crisis | <input type="radio"/> |

[ ]

## Since the beginning of the crisis, have you had any Covid-19 symptoms?

Please choose **only one** of the following:

- ☐ Yes
- ☐ No
- ☐ Not sure
- ☐ I do not know exactly what the Covid-19 symptoms are

## [ ]How severe?

**Only answer this question if the following conditions are met:**

Answer was 'Yes' at question '14 [sympers]' ( Since the beginning of the crisis, have you had any Covid-19 symptoms? )

Please choose the appropriate response for each item:

|                     | 1                     | 2                     | 3                     | 4                     | 5                     | 6                     |                     |
|---------------------|-----------------------|-----------------------|-----------------------|-----------------------|-----------------------|-----------------------|---------------------|
| Very light symptoms | <input type="radio"/> | Very heavy symptoms |

[ ]

## Since the beginning of the crisis, have any of your relatives (friends,family) developed any Covid-19 symptoms?

Please choose **only one** of the following:

- ☐ Yes, one
- ☐ Yes, between 2 and 5
- ☐ Yes, more than 5 people

- 



1 (completely disagree) 2 3 4 5 6 (completely agree)



○

[ ]

**We will now ask you some questions about your level of understanding of the current Covid-19 crisis. For each statement, could you please evaluate your level of knowledge.**

Please choose the appropriate response for each item:

|                                                              | 1 (no<br>knowledge<br>at all) | 2                     | 3                     | 4                     | 5                     | 6 (very broad<br>knowledge) |
|--------------------------------------------------------------|-------------------------------|-----------------------|-----------------------|-----------------------|-----------------------|-----------------------------|
| ... about the<br>Covid-19's<br>transmission                  | <input type="radio"/>         | <input type="radio"/> | <input type="radio"/> | <input type="radio"/> | <input type="radio"/> | <input type="radio"/>       |
| ... about<br>Covid-19<br>and its<br>impact on<br>your health | <input type="radio"/>         | <input type="radio"/> | <input type="radio"/> | <input type="radio"/> | <input type="radio"/> | <input type="radio"/>       |

[ ]

**Please now evaluate the importance of the medium to your information research about Covid-19 crisis.**

Please choose the appropriate response for each item:

|                         | 1 (not<br>important<br>at all) | 2                     | 3                     | 4                     | 5                     | 6 (very<br>important) |
|-------------------------|--------------------------------|-----------------------|-----------------------|-----------------------|-----------------------|-----------------------|
| Internet                | <input type="radio"/>          | <input type="radio"/> | <input type="radio"/> | <input type="radio"/> | <input type="radio"/> | <input type="radio"/> |
| Television              | <input type="radio"/>          | <input type="radio"/> | <input type="radio"/> | <input type="radio"/> | <input type="radio"/> | <input type="radio"/> |
| Social media            | <input type="radio"/>          | <input type="radio"/> | <input type="radio"/> | <input type="radio"/> | <input type="radio"/> | <input type="radio"/> |
| Health<br>professionals | <input type="radio"/>          | <input type="radio"/> | <input type="radio"/> | <input type="radio"/> | <input type="radio"/> | <input type="radio"/> |
| Relatives               | <input type="radio"/>          | <input type="radio"/> | <input type="radio"/> | <input type="radio"/> | <input type="radio"/> | <input type="radio"/> |
| Personal<br>experiences | <input type="radio"/>          | <input type="radio"/> | <input type="radio"/> | <input type="radio"/> | <input type="radio"/> | <input type="radio"/> |

## Measures followed

[ ]

**The Government has announced different measures that should be followed in order to prevent the Covid-19 contagion.**

**For each measure that will now be presented in the following pages please answer the relevant questions.**

**[ ]**

**SOCIAL DISTANCING – staying at least 2 meters (3 steps) from others : in comparison with your usual habit, how often do you adopt this measure?**

Please choose the appropriate response for each item:

|                     | 1                     | 2                     | 3                     | 4                     | 5                     | 6                     |                           |
|---------------------|-----------------------|-----------------------|-----------------------|-----------------------|-----------------------|-----------------------|---------------------------|
| Not more than usual | <input type="radio"/> | Extremely more than usual |

**[ ]**

**SOCIAL DISTANCING – staying at least 2 meters (3 steps) from others : how determinant are the following reasons in your choice to follow this recommendation?**

Please choose the appropriate response for each item:

|                                                                       | 1 (not at all determining) | 2                     | 3                     | 4                     | 5                     | 6 (completely determining) |
|-----------------------------------------------------------------------|----------------------------|-----------------------|-----------------------|-----------------------|-----------------------|----------------------------|
| To reduce the risk of being personally infected and to protect myself | <input type="radio"/>      | <input type="radio"/> | <input type="radio"/> | <input type="radio"/> | <input type="radio"/> | <input type="radio"/>      |
| To reduce the risk of infecting my relatives (family and friends)     | <input type="radio"/>      | <input type="radio"/> | <input type="radio"/> | <input type="radio"/> | <input type="radio"/> | <input type="radio"/>      |
| To break the infection chain                                          | <input type="radio"/>      | <input type="radio"/> | <input type="radio"/> | <input type="radio"/> | <input type="radio"/> | <input type="radio"/>      |

**Measured followed2**

[ ]

**NO SOCIAL GATHERING OF MORE THAN 2 PEOPLE: in comparison with your usual habit, how often do you adopt this measure?**

Please choose the appropriate response for each item:

|                     | 1                     | 2                     | 3                     | 4                     | 5                     | 6                     |                           |
|---------------------|-----------------------|-----------------------|-----------------------|-----------------------|-----------------------|-----------------------|---------------------------|
| Not more than usual | <input type="radio"/> | Extremely more than usual |

[ ]

**NO SOCIAL GATHERINGS OF MORE THAN 2 PEOPLE: how determinant are the following reasons in your choice to follow this recommendation?**

Please choose the appropriate response for each item:

|                                                                       | 1 (not at all determining) | 2                     | 3                     | 4                     | 5                     | 6 (completely determining) |
|-----------------------------------------------------------------------|----------------------------|-----------------------|-----------------------|-----------------------|-----------------------|----------------------------|
| To reduce the risk of being personally infected and to protect myself | <input type="radio"/>      | <input type="radio"/> | <input type="radio"/> | <input type="radio"/> | <input type="radio"/> | <input type="radio"/>      |
| To reduce the risk of infecting my relatives (family and friends)     | <input type="radio"/>      | <input type="radio"/> | <input type="radio"/> | <input type="radio"/> | <input type="radio"/> | <input type="radio"/>      |
| To break the infection chain                                          | <input type="radio"/>      | <input type="radio"/> | <input type="radio"/> | <input type="radio"/> | <input type="radio"/> | <input type="radio"/>      |

**Measured followed3**

[ ]

**WASH YOUR HANDS CAREFULLY: in comparison with your usual habit, how often do you adopt this measure?**

Please choose the appropriate response for each item:

|                     | 1                     | 2                     | 3                     | 4                     | 5                     | 6                     |                           |
|---------------------|-----------------------|-----------------------|-----------------------|-----------------------|-----------------------|-----------------------|---------------------------|
| Not more than usual | <input type="radio"/> | Extremely more than usual |

[ ]

**WASH YOUR HANDS CAREFULLY : how determinant are the following reasons in your choice to follow this recommendation?**

Please choose the appropriate response for each item:

|                                                                       | 1 (not at all determining) | 2                     | 3                     | 4                     | 5                     | 6 (completely determining) |
|-----------------------------------------------------------------------|----------------------------|-----------------------|-----------------------|-----------------------|-----------------------|----------------------------|
| To reduce the risk of being personally infected and to protect myself | <input type="radio"/>      | <input type="radio"/> | <input type="radio"/> | <input type="radio"/> | <input type="radio"/> | <input type="radio"/>      |
| To reduce the risk of infecting my relatives (family and friends)     | <input type="radio"/>      | <input type="radio"/> | <input type="radio"/> | <input type="radio"/> | <input type="radio"/> | <input type="radio"/>      |
| To break the infection chain                                          | <input type="radio"/>      | <input type="radio"/> | <input type="radio"/> | <input type="radio"/> | <input type="radio"/> | <input type="radio"/>      |

**Measured followed4**

[ ]

**STAYING AT HOME (UNLESS CASE OF NECESSITY): in comparison with your usual habit, how often do you adopt this measure?**

Please choose the appropriate response for each item:

|                     | 1                     | 2                     | 3                     | 4                     | 5                     | 6                     |                           |
|---------------------|-----------------------|-----------------------|-----------------------|-----------------------|-----------------------|-----------------------|---------------------------|
| Not more than usual | <input type="radio"/> | Extremely more than usual |

[ ]

**STAYING AT HOME (UNLESS CASE OF NECESSITY): how determinant are the following reasons in your choice to follow this recommendation?**

Please choose the appropriate response for each item:

|                                                                       | 1 (not at all determining) | 2                     | 3                     | 4                     | 5                     | 6 (completely determining) |
|-----------------------------------------------------------------------|----------------------------|-----------------------|-----------------------|-----------------------|-----------------------|----------------------------|
| To reduce the risk of being personally infected and to protect myself | <input type="radio"/>      | <input type="radio"/> | <input type="radio"/> | <input type="radio"/> | <input type="radio"/> | <input type="radio"/>      |
| To reduce the risk of infecting my relatives (family and friends)     | <input type="radio"/>      | <input type="radio"/> | <input type="radio"/> | <input type="radio"/> | <input type="radio"/> | <input type="radio"/>      |
| To break the infection chain                                          | <input type="radio"/>      | <input type="radio"/> | <input type="radio"/> | <input type="radio"/> | <input type="radio"/> | <input type="radio"/>      |

**Measures non followed**

**[ ] In general, relative to the times you did not respect these measures previously mentioned; how determinant are the following reasons in determining your choice?**

Please choose the appropriate response for each item:





[illegible]



[illegible]

[illegible]

# Intentions

[ ]

**Please now indicate what you would be ready to do for the environment once the Covid-19 crisis is over? To answer these questions imagine that things are back to normal after the coronavirus crisis.**

**I am ready to commit to...**

Please choose the appropriate response for each item:

[illegible]

|                                                                                                                     | 1<br>(not<br>at all)  | 2                     | 3                     | 4                     | 5                     | 6<br>(completely)     | <u>I all<br/>ready<br/>do</u> |
|---------------------------------------------------------------------------------------------------------------------|-----------------------|-----------------------|-----------------------|-----------------------|-----------------------|-----------------------|-------------------------------|
| when it is<br>empty for at<br>least two days                                                                        |                       |                       |                       |                       |                       |                       |                               |
| ... volunteering<br>in an active<br>association<br>fighting for the<br>protection of<br>biodiversity                | <input type="radio"/>         |
| ... entrusting my<br>money in a<br>bank the<br>investments of<br>which are<br>ecological                            | <input type="radio"/>         |
| ... only buying<br>food that is not<br>wrapped in<br>plastic.                                                       | <input type="radio"/>         |
| ... organising<br>(with the help<br>of my<br>neighbours) the<br>facilitation of<br>bike use in our<br>neighbourhood | <input type="radio"/>         |
| ... only using<br>furniture<br>manufactured<br>with<br>environmentally<br>friendly<br>materials                     | <input type="radio"/>         |
| ... Often and<br>non violently<br>manifesting for<br>climate                                                        | <input type="radio"/>         |

## Change of opinion

[]

**Now think of the answers you have just given, do you think that the Covid-19 crisis has changed your mind? If so, in which direction?**

Please choose the appropriate response for each item:

|                                             | 1                     | 2                     | 3                     | 4                     | 5                     | 6                     |                                              |
|---------------------------------------------|-----------------------|-----------------------|-----------------------|-----------------------|-----------------------|-----------------------|----------------------------------------------|
| I am much less worried about climate change | <input type="radio"/> | I am a lot more worried about climate change |

We thank you very much for your participation in this study.

We hypothesise that the COVID-19 crisis has helped us understand the strong links and relationships that compose society; specifically, that this change in perception will come hand in hand with a better understanding of climate change and the complex interdependence underlying it (between generations or between countries for example). Furthermore, we expect that through this understanding, people's willingness to act for the environment will be strengthened.

If you would like to know the results of this study (in due time) or if you have any other questions, feel free to contact us : [covips@unil.ch](mailto:covips@unil.ch).

Finally, we would be extremely thankful if you could forward the link of this study to the people around you; without telling them the aim of the study of course.

06-12-2020 – 20:28

Submit your survey.  
Thank you for completing this survey.
