# Supplementary material
Source: MDPI journal article supplement (https://www.mdpi.com/2071-1050/15/17/13194)
Supplement: s1 [file covips_SOM2.pdf › final SOM/covips_SOM2.pdf]

## Supplementary Online Material 2, SOM2

Means and standard deviations (or frequencies, when relevant) of all items (but socio-demographics and pro-environmental behaviours and intentions), in general and by country

*Notes.* Items are in order of presentation; when not otherwise specified, scales from 1 (completely agree) to 6 (completely disagree)). \*Items were presented in a randomized order.

|                                                                                    | General |        | Switzerland |        | France |        | Spain |        | UK   |        |
|------------------------------------------------------------------------------------|---------|--------|-------------|--------|--------|--------|-------|--------|------|--------|
|                                                                                    | M       | SD     | M           | SD     | M      | SD     | M     | SD     | M    | SD     |
| <b>Political orientation</b>                                                       |         |        |             |        |        |        |       |        |      |        |
| [lrscale] What is your political orientation (1 = far leftwing; 6 = far rightwing) | 2.66    | (1.11) | 2.53        | (1.00) | 2.80   | (1.28) | 2.49  | (1.06) | 2.89 | (1.04) |
| <b>Human values*: We would like you to tell us how important it is for you ...</b> |         |        |             |        |        |        |       |        |      |        |
| [unic1] ... that every person in the world should have equal opportunities in life | 5.43    | (0.99) | 5.54        | (0.81) | 5.27   | (1.18) | 5.59  | (0.82) | 5.27 | (1.09) |
| [unic2] ... that everyone is treated justly, even people you do not know           | 5.60    | (0.75) | 5.65        | (0.65) | 5.43   | (0.97) | 5.73  | (0.53) | 5.59 | (0.77) |
| [unin1] ... that nature is cared for                                               | 5.50    | (0.82) | 5.44        | (0.82) | 5.50   | (0.88) | 5.64  | (0.65) | 5.47 | (0.88) |
| [unin2] ... to protect the natural environment from destruction or pollution       | 5.45    | (0.87) | 5.44        | (0.81) | 5.41   | (1.01) | 5.54  | (0.71) | 5.45 | (0.91) |
| [benc1] ... to care for the wellbeing of people that you are close to              | 5.54    | (0.78) | 5.55        | (0.71) | 5.43   | (0.91) | 5.63  | (0.72) | 5.57 | (0.75) |
| [benc2] ... to help the people that are dear to you                                | 5.64    | (0.70) | 5.70        | (0.60) | 5.53   | (0.84) | 5.75  | (0.56) | 5.59 | (0.76) |
| [confr1] ... to obey all the laws                                                  | 4.01    | (1.43) | 4.04        | (1.24) | 3.95   | (1.52) | 3.81  | (1.51) | 4.25 | (1.47) |
| [confr2] ... to follow rules even when no one is watching                          | 4.42    | (1.39) | 4.48        | (1.20) | 4.34   | (1.46) | 4.44  | (1.53) | 4.39 | (1.43) |
| [secp1] ... to feel secure personally                                              | 4.95    | (1.12) | 4.99        | (0.96) | 4.69   | (1.40) | 5.07  | (1.05) | 5.09 | (0.98) |
| [secp2] ... to avoid anything that could endanger your security                    | 4.33    | (1.38) | 4.22        | (1.26) | 4.19   | (1.55) | 4.50  | (1.33) | 4.50 | (1.34) |
| [secs1] ... to have a strong State so that it can defend its citizens              | 4.62    | (1.36) | 4.77        | (1.14) | 4.55   | (1.43) | 4.82  | (1.46) | 4.25 | (1.43) |

|                                                                                                                |             |             |             |             |             |
|----------------------------------------------------------------------------------------------------------------|-------------|-------------|-------------|-------------|-------------|
| [secs2] ... that your country protects itself against all threats                                              | 4.39 (1.38) | 4.37 (1.26) | 4.42 (1.40) | 4.45 (1.44) | 4.35 (1.46) |
| <b>Social desirability*: Now, please indicate the degree to which you agree with the following statements.</b> |             |             |             |             |             |
| [desgen1] My first impressions of people usually turn out to be right                                          | 4.05 (1.15) | 4.07 (1.13) | 4.17 (1.20) | 3.97 (1.09) | 3.94 (1.18) |
| [desgen2] I always know why I like things                                                                      | 3.96 (1.34) | 3.88 (1.34) | 4.26 (1.39) | 3.95 (1.27) | 3.76 (1.31) |
| [desgen3] Once I've made up my mind, other people can seldom change my opinion                                 | 3.60 (1.30) | 3.77 (1.25) | 3.92 (1.35) | 3.24 (1.20) | 3.33 (1.25) |
| [desgen4] I am fully in control of my own fate                                                                 | 3.79 (1.39) | 4.19 (1.16) | 4.26 (1.39) | 3.09 (1.30) | 3.31 (1.39) |
| [desgen5] I never regret my decisions                                                                          | 3.31 (1.29) | 3.42 (1.23) | 3.69 (1.35) | 3.02 (1.20) | 2.97 (1.24) |
| [desgen6] I am a completely rational person                                                                    | 4.08 (1.26) | 3.85 (1.18) | 4.22 (1.28) | 4.27 (1.31) | 4.05 (1.26) |
| [desgen7] I am very confident in my judgements                                                                 | 4.23 (1.14) | 3.95 (1.13) | 4.17 (1.14) | 4.77 (0.92) | 4.18 (1.19) |
| [desgen8] It's all right with me if some people happen to dislike me                                           | 4.22 (1.46) | 3.64 (1.50) | 4.49 (1.44) | 4.57 (1.35) | 4.44 (1.23) |
| <b>Psychological distance of COVID-19*</b>                                                                     |             |             |             |             |             |
| [covdist1] I don't see myself as someone who will be affected by the Covid-19 crisis (r)                       | 4.44 (1.42) | 4.22 (1.40) | 4.26 (1.50) | 4.66 (1.37) | 4.80 (1.29) |
| [covdist2] My family is safe from the effects of the Covid-19 crisis (r)                                       | 4.15 (1.44) | 4.00 (1.36) | 4.17 (1.47) | 4.21 (1.54) | 4.31 (1.38) |
| [covdist3] I can identify with victims of the Covid-19 crisis                                                  | 3.95 (1.49) | 3.51 (1.44) | 3.76 (1.55) | 4.59 (1.33) | 4.23 (1.38) |
| [covdist4] The Covid-10 crisis is virtually certain to affect the world                                        | 5.27 (1.06) | 5.24 (0.99) | 5.09 (1.15) | 5.30 (1.06) | 5.50 (1.01) |
| [covdist5] It is almost certain that the Covid-19 crisis will change my life for the worse                     | 3.29 (1.45) | 2.83 (1.31) | 3.61 (1.53) | 3.53 (1.40) | 3.36 (1.46) |
| [covdist6] It is extremely unlikely that the Covid-19 crisis will affect me ®                                  | 4.42 (1.41) | 4.11 (1.40) | 4.27 (1.52) | 4.46 (1.34) | 5.00 (1.19) |
| [covdist7] I have the impressions that all opinions about the Covid-19 crisis converge (r)                     | 4.35 (1.53) | 4.04 (1.56) | 4.42 (1.78) | 4.55 (1.42) | 4.52 (1.19) |

|                                                                                                                              |             |             |             |             |             |
|------------------------------------------------------------------------------------------------------------------------------|-------------|-------------|-------------|-------------|-------------|
| [covdist8] One can read very different opinions about the Covid-19 crisis in the media                                       | 4.86 (1.31) | 4.67 (1.25) | 4.95 (1.39) | 4.87 (1.32) | 5.05 (1.29) |
| [covdist9] Certain scientific and political people seem to disagree on opinions concerning the Covid-19 crisis               | 5.01 (1.15) | 4.83 (1.15) | 5.34 (1.04) | 4.84 (1.27) | 5.07 (1.07) |
| [covidst10] Public authority messages concerning the Covid-19 crisis are very clear (r)                                      | 4.07 (1.57) | 3.36 (1.38) | 4.64 (1.56) | 4.22 (1.50) | 4.35 (1.52) |
| <b>Self-rated health: How would you describe your health in general?</b>                                                     |             |             |             |             |             |
| [health_before] Before the Covid-19 crisis                                                                                   | 4.79 (1.04) | 5.03 (0.90) | 4.68 (1.08) | 4.75 (0.97) | 4.57 (1.19) |
| [health_since] Since the beginning of the Covid-19 crisis                                                                    | 4.51 (1.15) | 4.73 (1.09) | 4.42 (1.15) | 4.36 (1.15) | 4.45 (1.22) |
| <b>COVID symptoms</b>                                                                                                        |             |             |             |             |             |
| [symppers] Since the beginning of the crisis, have you had any Covid-19 symptoms?                                            |             |             |             |             |             |
| Yes                                                                                                                          | 12.88%      | 10.79%      | 10.74%      | 17.16%      | 14.36%      |
| No                                                                                                                           | 67.19%      | 69.21%      | 67.77%      | 60.29%      | 70.30%      |
| Not sure                                                                                                                     | 19.21%      | 19.68%      | 20.66%      | 21.57%      | 14.36%      |
| I do not know exactly what the Covid-19 symptoms are                                                                         | 0.73%       | 0.32%       | 0.83%       | 0.98%       | 0.99%       |
| [gravitesymppers] How severe ? (if answer was 'yes' to [symppers]).                                                          | 2.27 (1.14) | 2.56 (1.28) | 2.46 (1.03) | 1.69 (0.93) | 2.45 (1.09) |
| [sympother] Since the beginning of the crisis, have any of your relatives (friends, family) developed any Covid-19 symptoms? |             |             |             |             |             |
| Yes, one                                                                                                                     | 15.94%      | 22.22%      | 13.58%      | 12.75%      | 12.25%      |
| Yes, between 2 and 5                                                                                                         | 30.02%      | 29.84%      | 22.22%      | 34.31%      | 35.29%      |
| Yes, more than 5 people                                                                                                      | 4.45%       | 3.81%       | 5.35%       | 5.88%       | 2.94%       |
| No, no one                                                                                                                   | 38.41%      | 34.29%      | 46.50%      | 31.86%      | 41.67%      |
| I am not sure                                                                                                                | 11.18%      | 9.84%       | 12.35%      | 15.20%      | 7.84%       |
| <b>Perceptions of the COVID-19 crisis: We will now ask you some questions about your perception</b>                          |             |             |             |             |             |

|                                                                                                                                                                                                                                                                                              |             |             |             |             |             |
|----------------------------------------------------------------------------------------------------------------------------------------------------------------------------------------------------------------------------------------------------------------------------------------------|-------------|-------------|-------------|-------------|-------------|
| <b>of the Covid-19 crisis. For each sentence, please state your level of agreement.</b>                                                                                                                                                                                                      |             |             |             |             |             |
| [perc1] The current situation will have long lasting impacts                                                                                                                                                                                                                                 | 5.16 (1.09) | 4.94 (1.12) | 5.15 (1.16) | 5.19 (1.08) | 5.46 (0.86) |
| [perc2] I have control over this situation                                                                                                                                                                                                                                                   | 2.80 (1.42) | 2.88 (1.37) | 2.99 (1.53) | 2.75 (1.36) | 2.51 (1.41) |
| [perc3] It is useful to observe and respect the different measures proposed to fight the virus                                                                                                                                                                                               | 5.07 (1.24) | 5.18 (1.20) | 4.88 (1.39) | 5.17 (1.17) | 5.00 (1.17) |
| [perc4] I am preoccupied by the current situation                                                                                                                                                                                                                                            | 4.25 (1.43) | 4.19 (1.27) | 4.31 (1.49) | 4.90 (1.30) | 3.61 (1.43) |
| [perc5] I understand the current situation well                                                                                                                                                                                                                                              | 4.47 (1.27) | 4.50 (1.22) | 4.50 (1.38) | 4.46 (1.35) | 4.39 (1.14) |
| [perc6] The current situation is affecting me emotionally                                                                                                                                                                                                                                    | 3.88 (1.54) | 3.74 (1.44) | 3.78 (1.63) | 4.26 (1.53) | 3.87 (1.53) |
| <b>Subjective knowledge of the COVID-19 crisis:<br/>We will now ask you some questions about your level of understanding of the current Covid-19 crisis. For each statement, could you please evaluate your level of knowledge. From 1 (no knowledge at all) to 6 (very broad knowledge)</b> |             |             |             |             |             |
| [know1] ... about the Covid-19's transmission                                                                                                                                                                                                                                                | 4.57 (0.99) | 4.51 (0.89) | 4.45 (1.07) | 4.58 (1.06) | 4.77 (0.94) |
| [know2] ... about Covid-19 and its impact on your health                                                                                                                                                                                                                                     | 4.47 (1.04) | 4.26 (0.99) | 4.38 (1.12) | 4.58 (0.97) | 4.79 (0.98) |
| <b>COVID-19 research information: Please now evaluate the importance of the medium to your information research about Covid-19 crisis. From 1 (not important at all) to 6 (very important)</b>                                                                                               |             |             |             |             |             |
| [info1] Internet                                                                                                                                                                                                                                                                             | 4.59 (1.41) | 4.49 (1.44) | 4.66 (1.39) | 4.71 (1.29) | 4.53 (1.50) |
| [info2] Television                                                                                                                                                                                                                                                                           | 3.38 (1.73) | 3.87 (1.71) | 2.67 (1.64) | 3.16 (1.59) | 3.70 (1.69) |
| [info3] Social media                                                                                                                                                                                                                                                                         | 3.01 (1.62) | 2.80 (1.63) | 3.23 (1.64) | 3.29 (1.59) | 2.83 (1.54) |
| [info4] Health professionals                                                                                                                                                                                                                                                                 | 4.82 (1.37) | 4.71 (1.38) | 4.53 (1.52) | 5.16 (1.15) | 5.01 (1.26) |
| [info5] Relatives                                                                                                                                                                                                                                                                            | 3.21 (1.41) | 3.44 (1.33) | 3.00 (1.48) | 3.43 (1.44) | 2.88 (1.34) |
| [info6] Personal experiences                                                                                                                                                                                                                                                                 | 3.35 (1.60) | 3.19 (1.61) | 3.41 (1.72) | 3.54 (1.54) | 3.33 (1.50) |
| <b>Anti-COVID measures: The Government has announced different measures that should be</b>                                                                                                                                                                                                   |             |             |             |             |             |

**followed in order to prevent the Covid-19 contagion. For each measure that will now be presented in the following pages please answer the relevant questions.**

|                                                                                                                                                                                                                                                                         |             |             |             |             |             |
|-------------------------------------------------------------------------------------------------------------------------------------------------------------------------------------------------------------------------------------------------------------------------|-------------|-------------|-------------|-------------|-------------|
| [m1_freq] SOCIAL DISTANCING – staying at least [CH=2 meters] [FR=1 meter] [SP=1-2 meters] [UK=2 meters (3 steps)] from others : in comparison with your usual habit, how often do you adopt this measure? From 1 (not more than usual) to 6 (extremely more than usual) | 5.15 (1.15) | 5.11 (1.00) | 5.06 (1.30) | 4.98 (1.26) | 5.49 (1.00) |
| How determinant are the following reasons in your choice to follow this recommendation? From 1 (not at all determining) to 6 (completely determining)                                                                                                                   |             |             |             |             |             |
| [m1_reas1] To reduce the risk of being personally infected and to protect myself                                                                                                                                                                                        | 4.84 (1.51) | 4.75 (1.46) | 4.81 (1.54) | 4.81 (1.57) | 5.03 (1.47) |
| [m1_reas2] To reduce the risk of infecting my relatives (family and friends)                                                                                                                                                                                            | 5.31 (1.16) | 5.36 (1.02) | 5.20 (1.29) | 5.32 (1.17) | 5.33 (1.19) |
| [m1_reas3] To break the infection chain                                                                                                                                                                                                                                 | 5.25 (1.15) | 5.28 (1.04) | 5.10 (1.29) | 5.24 (1.19) | 5.39 (1.07) |
| [m2freq] NO SOCIAL GATHERING OF [CH=MORE THAN 5 PEOPLE] [FR=AVOIDING GROUP OF PEOPLE] [SP=COVER YOUR MOUTH WITH YOUR ELBOW WHEN COUGHING OR SNEEZING] [UK=MORE THAN 2 PEOPLE]: in comparison with your usual habit, how often do you adopt this measure?                | 5.10 (1.32) | 5.41 (0.87) | 4.86 (1.48) | 4.59 (1.63) | 5.43 (1.08) |
| How determinant are the following reasons in your choice to follow this recommendation? From 1 (not at all determining) to 6 (completely determining)                                                                                                                   |             |             |             |             |             |
| [m2_reas1] To reduce the risk of being personally infected and to protect myself                                                                                                                                                                                        | 4.64 (1.63) | 4.62 (1.49) | 4.71 (1.61) | 4.23 (1.92) | 4.99 (1.48) |

|                                                                                                                                                       |             |             |             |             |             |
|-------------------------------------------------------------------------------------------------------------------------------------------------------|-------------|-------------|-------------|-------------|-------------|
| [m2_reas2] To reduce the risk of infecting my relatives (family and friends)                                                                          | 5.17 (1.28) | 5.20 (1.14) | 5.09 (1.40) | 5.07 (1.39) | 5.31 (1.22) |
| [m2_reas3] To break the infection chain                                                                                                               | 5.17 (1.24) | 5.21 (1.06) | 5.07 (1.36) | 5.06 (1.41) | 5.35 (1.14) |
| [m3freq] WASH YOUR HANDS CAREFULLY: in comparison with your usual habit, how often do you adopt this measure?                                         | 4.89 (1.33) | 5.01 (1.15) | 4.74 (1.46) | 4.89 (1.38) | 4.89 (1.38) |
| How determinant are the following reasons in your choice to follow this recommendation? From 1 (not at all determining) to 6 (completely determining) |             |             |             |             |             |
| [m3_reas1] To reduce the risk of being personally infected and to protect myself                                                                      | 5.10 (1.36) | 5.10 (1.31) | 5.09 (1.42) | 5.09 (1.35) | 5.10 (1.39) |
| [m3_reas2] To reduce the risk of infecting my relatives (family and friends)                                                                          | 5.27 (1.18) | 5.41 (0.95) | 5.18 (1.30) | 5.26 (1.22) | 5.19 (1.28) |
| [m3_reas3] To break the infection chain                                                                                                               | 5.21 (1.18) | 5.29 (1.05) | 5.15 (1.23) | 5.18 (1.25) | 5.18 (1.25) |
| [m4freq] STAYING AT HOME (UNLESS CASE OF NECESSITY): in comparison with your usual habit, how often do you adopt this measure?                        | 5.12 (1.33) | 4.88 (1.30) | 4.98 (1.55) | 5.51 (1.08) | 5.25 (1.21) |
| How determinant are the following reasons in your choice to follow this recommendation? From 1 (not at all determining) to 6 (completely determining) |             |             |             |             |             |
| [m4_reas1] To reduce the risk of being personally infected and to protect myself                                                                      | 4.83 (1.58) | 4.70 (1.55) | 4.69 (1.70) | 5.03 (1.49) | 5.00 (1.54) |
| [m4_reas2] To reduce the risk of infecting my relatives (family and friends)                                                                          | 5.12 (1.39) | 5.08 (1.33) | 4.96 (1.56) | 5.33 (1.20) | 5.15 (1.41) |
| [m4_reas3] To break the infection chain                                                                                                               | 5.16 (1.32) | 5.14 (1.20) | 4.95 (1.51) | 5.36 (1.23) | 5.25 (1.30) |
| [didnotfollow1] I believed that I did not risk anything                                                                                               | 3.95 (1.83) | 3.93 (1.68) | 4.05 (1.91) | 3.73 (1.94) | 4.07 (1.82) |
| [didnotfollow2] I believed that my relatives (family and friends) did not risk anything                                                               | 4.04 (1.86) | 3.96 (1.80) | 4.16 (1.89) | 3.94 (1.96) | 4.12 (1.81) |

|                                                                                                                        |             |             |             |             |             |
|------------------------------------------------------------------------------------------------------------------------|-------------|-------------|-------------|-------------|-------------|
| [didnotfollow3] I believed my behaviours would not affect the others                                                   | 4.14 (1.84) | 4.14 (1.73) | 4.31 (1.86) | 4.03 (1.95) | 4.07 (1.86) |
| <b>Perceived interdependencies</b>                                                                                     |             |             |             |             |             |
| [inter1] I am someone unique                                                                                           | 4.40 (1.59) | 4.62 (1.45) | 4.07 (1.74) | 4.22 (1.68) | 4.63 (1.43) |
| [inter2] The relations (with family and friends) I entertain are important to my definition of myself                  | 4.55 (1.31) | 4.75 (1.18) | 4.40 (1.41) | 4.59 (1.27) | 4.35 (1.35) |
| [inter3] My social environment is part of who I am                                                                     | 4.56 (1.29) | 4.64 (1.14) | 4.38 (1.47) | 4.61 (1.34) | 4.62 (1.20) |
| [inter4] My achievement and failures are the result of my own decisions                                                | 4.59 (1.17) | 4.47 (1.13) | 4.71 (1.21) | 4.58 (1.18) | 4.65 (1.16) |
| [inter5] My relative's (family and friends) opinions have an effect on my own actions                                  | 3.78 (1.31) | 4.07 (1.14) | 3.40 (1.39) | 3.53 (1.34) | 3.91 (1.30) |
| [inter6] Most of my actions are the result of the context in which I live                                              | 4.40 (1.20) | 4.43 (1.08) | 4.43 (1.28) | 4.28 (1.25) | 4.46 (1.22) |
| [inter7] A healthy society is a society in which everyone is free to follow their own aspirations                      | 4.22 (1.47) | 4.20 (1.42) | 4.27 (1.56) | 4.22 (1.57) | 4.17 (1.34) |
| [inter8] A healthy society is a society in which everyone acts in the interest of their relatives (family and friends) | 4.16 (1.48) | 4.20 (1.32) | 4.09 (1.58) | 4.10 (1.57) | 4.25 (1.50) |
| [inter9] A health society is a society in which everyone acts in common interest                                       | 5.07 (1.10) | 5.05 (1.00) | 5.04 (1.15) | 5.20 (1.10) | 5.00 (1.19) |
| [inter10] In general, I feel like I am independent                                                                     | 4.57 (1.18) | 4.63 (1.02) | 4.80 (1.14) | 4.09 (1.32) | 4.67 (1.20) |
| [inter11] In general, I feel link to my relatives (family and friends)                                                 | 4.92 (1.14) | 5.05 (1.03) | 4.79 (1.24) | 5.04 (1.07) | 4.76 (1.23) |
| [inter12] In general, I feel like I am linked to others even if I do not know them                                     | 3.88 (1.42) | 3.87 (1.34) | 3.49 (1.56) | 4.05 (1.32) | 4.18 (1.35) |
| <b>Environmental social desirability*</b>                                                                              |             |             |             |             |             |
| [desenv1] My behaviour is consistent with my beliefs about environmental issues                                        | 4.47 (1.19) | 4.27 (1.16) | 4.58 (1.21) | 4.61 (1.19) | 4.50 (1.16) |
| [desenv2] I know what actions I should take regarding how best to protect the environment                              | 4.58 (1.20) | 4.64 (1.15) | 4.53 (1.26) | 4.65 (1.23) | 4.45 (1.18) |
| [desenv3] I am always honest with myself about how I really feel about the environment                                 | 4.67 (1.23) | 4.57 (1.20) | 4.74 (1.20) | 4.74 (1.25) | 4.68 (1.28) |

|                                                                                                       |             |             |             |             |             |
|-------------------------------------------------------------------------------------------------------|-------------|-------------|-------------|-------------|-------------|
| [desenv4] I do not regret my decisions about environmental issues                                     | 4.34 (1.42) | 4.31 (1.33) | 4.61 (1.45) | 4.16 (1.55) | 4.26 (1.36) |
| [desenv5] I am not concerned about environmental issues (r)                                           | 5.09 (1.46) | 5.17 (1.26) | 4.89 (1.66) | 5.42 (1.16) | 4.90 (1.70) |
| <b>Psychological distance of climate change*</b>                                                      |             |             |             |             |             |
| [ccd1] I don't see myself as someone who will be affected by climate change (r)                       | 4.88 (1.48) | 4.83 (1.38) | 4.67 (1.74) | 5.13 (1.29) | 4.96 (1.43) |
| [ccd2] My family is safe from the effects of climate change (r)                                       | 4.89 (1.37) | 4.73 (1.38) | 4.85 (1.46) | 5.18 (1.17) | 4.89 (1.38) |
| [ccd3] I can identify with victims of climate related disasters                                       | 3.92 (1.55) | 3.79 (1.47) | 3.72 (1.67) | 4.23 (1.52) | 4.04 (1.48) |
| [ccd4] Climate change is virtually certain to affect the world                                        | 5.44 (1.18) | 5.57 (0.93) | 5.19 (1.51) | 5.53 (0.97) | 5.44 (1.23) |
| [ccd5] It is almost certain that climate change will change my life for the worse                     | 4.17 (1.54) | 4.09 (1.42) | 4.24 (1.66) | 4.17 (1.49) | 4.19 (1.62) |
| [ccd6] It is extremely unlikely that climate change will affect me                                    | 4.88 (1.48) | 4.91 (1.33) | 4.89 (1.54) | 4.83 (1.55) | 4.88 (1.55) |
| [ccd7] I have the impression that all opinions about climate change converge                          | 4.25 (1.58) | 3.85 (1.60) | 4.16 (1.71) | 4.68 (1.40) | 4.54 (1.36) |
| [ccd8] One can read very different opinions about climate change in the media                         | 4.40 (1.50) | 4.09 (1.44) | 4.14 (1.67) | 4.57 (1.41) | 5.00 (1.25) |
| [ccd9] Certain scientific and political people seem to disagree on opinions concerning climate change | 4.76 (1.41) | 4.71 (1.33) | 4.68 (1.55) | 4.81 (1.35) | 4.88 (1.44) |
| [ccd10] Public authority messages concerning climate change are very clear                            | 4.64 (1.36) | 4.40 (1.29) | 5.08 (1.27) | 4.51 (1.49) | 4.61 (1.33) |
| <b>[changeop] Perceived impact of COVID-19 on climate. change concern</b>                             | 4.24 (1.30) | 4.17 (1.13) | 4.34 (1.50) | 4.55 (1.24) | 3.92 (1.25) |
