# Supplementary material
Source: MDPI journal article supplement (https://www.mdpi.com/2071-1050/15/17/13194)
Supplement: s1 [file covips_SOM3.pdf › final SOM/covips_SOM3.pdf]

### Supplementary Online Material 3, SOM3

Reasons for following anti-COVID measures, principal component analysis with oblimin rotation (only loadings greater than .30 are shown; for items' wording, see Supplementary Online Material 1, SOM1)

| Items    | Factor 1 | Factor 2 |
|----------|----------|----------|
| m1_reas1 | .61      | .69      |
| m1_reas2 | .80      |          |
| m1_reas3 | .82      |          |
| m2_reas1 | .59      | .63      |
| m2_reas2 | .80      |          |
| m2_reas3 | .83      |          |
| m3_reas1 | .63      | .62      |
| m3_reas2 | .79      |          |
| m3_reas3 | .82      |          |
| m4_reas1 | .64      | .61      |
| m4_reas2 | .75      |          |
| m4_reas3 | .80      |          |

Self-construals, principal component analysis with oblimin rotation (only loadings greater than .30 are shown; for items' wording, see Supplementary Online Material 1, SOM1)

| Items   | Factor 1 | Factor 2 | Factor 3 |
|---------|----------|----------|----------|
| inter1  |          | .49      |          |
| inter2  | .75      |          |          |
| inter3  | .64      |          |          |
| inter4  |          | .66      |          |
| inter5  | .70      |          |          |
| inter6  | .55      |          |          |
| inter7  |          | .50      |          |
| inter8  |          | .35      | .59      |
| inter9  |          |          | .81      |
| inter10 |          | .72      |          |
| inter11 | .61      |          |          |
| inter12 | .32      |          | .52      |

Psychological distance of climate change, principal component analysis with oblimin rotation (only loadings greater than .30 are shown; for items' wording, see Supplementary Online Material 1, SOM1)

| Items   | Factor 1 | Factor 2 | Factor 3 |
|---------|----------|----------|----------|
| ccdist1 | .72      |          |          |
| ccdist2 | .76      |          |          |
| ccdist3 | .52      |          | -.33     |
| ccdist4 | .69      |          |          |
| ccdist5 | .71      |          |          |
| ccdist6 | .76      |          |          |
| ccdist7 |          | .47      | .57      |
| ccdist8 |          | .79      |          |

|       |     |     |
|-------|-----|-----|
| ccd9  | .82 |     |
| ccd10 |     | .79 |

Psychological distance of COVID-19, principal component analysis with oblimin rotation (only loadings greater than .30 are shown; for items' wording, see Supplementary Online Material 1, SOM1)

| Items     | Factor 1 | Factor 2 | Factor 3 |
|-----------|----------|----------|----------|
| covdist1  | .83      |          |          |
| covdist2  | .77      |          |          |
| covdist3  |          | .71      |          |
| covdist4  |          | .76      |          |
| covdist5  |          | .80      |          |
| covdist6  | .82      |          |          |
| covdist7  |          |          | .80      |
| covdist8  |          | .84      |          |
| covdist9  |          | .84      |          |
| covdist10 |          |          | .72      |

Human values, principal component analysis with oblimin rotation (only loadings greater than .30 are shown; for items' wording, see Supplementary Online Material 1, SOM1)

| Items  | Factor 1 | Factor 2 | Factor 3 |
|--------|----------|----------|----------|
| unic1  |          | .69      |          |
| unci2  |          | .69      |          |
| unin1  |          | .86      |          |
| unin2  |          | .86      |          |
| benc1  |          |          | .88      |
| benc2  |          |          | .88      |
| confr1 | .82      |          |          |
| confr2 | .80      |          |          |
| secp1  | .69      |          |          |
| secp2  | .80      |          |          |
| secs1  | .76      |          |          |
| secs2  | .83      |          |          |

General social desirability items, principal component analysis with oblimin rotation (only loadings greater than .30 are shown; for items' wording, see Supplementary Online Material 1, SOM1)

| Items   | Factor 1 |
|---------|----------|
| desgen1 | .56      |
| desgen2 | .69      |
| desgen3 | .63      |
| desgen4 | .64      |
| desgen5 | .72      |
| desgen6 | .65      |
| desgen7 | .69      |
| desgen8 | .41      |

Environmental social desirability, principal component analysis with oblimin rotation (only loadings greater than .30 are shown; for items' wording, see Supplementary Online Material 1, SOM1)

| Items   | Factor 1 | Factor 2 |
|---------|----------|----------|
| desenv1 | .80      |          |
| desenv2 | .63      |          |
| desenv3 | .78      |          |
| desenv4 | .77      |          |
| desenv5 |          | .97      |
