# Supplementary material
Source: MDPI journal article supplement (https://www.mdpi.com/2071-1050/15/17/13194)
Supplement: s1 [file covips_SOM4.pdf › final SOM/covips_SOM4.pdf]

## Supplementary Online Material 4, SOM4

Standardized results of Mplus path models predicting the probability to belong to the five latent profiles (separate analyses), including estimation of indirect paths and confidence intervals

### Predicting Class 4 : the strongly committed

Number of Free Parameters 141

#### Loglikelihood

H0 Value -8679.842

H1 Value -8645.808

#### Information Criteria

Akaike (AIC) 17641.684

Bayesian (BIC) 18319.914

Sample-Size Adjusted BIC 17872.119

( $n^* = (n + 2) / 24$ )

#### Chi-Square Test of Model Fit

Value 68.068

Degrees of Freedom 15

P-Value 0.0000

#### RMSEA (Root Mean Square Error Of Approximation)

Estimate 0.062

90 Percent C.I. 0.048 0.078

Probability RMSEA  $\leq$  .05 0.079

#### CFI/TLI

CFI 0.978

TLI 0.796

#### Chi-Square Test of Model Fit for the Baseline Model

Value 2569.829

Degrees of Freedom 140

P-Value 0.0000

#### SRMR (Standardized Root Mean Square Residual)

Value 0.023

## STANDARDIZED MODEL RESULTS

### STDYX Standardization

|          |      | Two-Tailed |         |
|----------|------|------------|---------|
| Estimate | S.E. | Est./S.E.  | P-Value |

PBCL4 ON

|            |        |       |        |       |
|------------|--------|-------|--------|-------|
| INTEROTH6  | 0.009  | 0.032 | 0.276  | 0.783 |
| DISTCLIM6  | 0.214  | 0.036 | 5.895  | 0.000 |
| MEAS_OTH8  | 0.024  | 0.042 | 0.555  | 0.579 |
| MEAS_SELF4 | -0.002 | 0.043 | -0.056 | 0.955 |
| DISTCOV3   | -0.026 | 0.031 | -0.845 | 0.398 |
| HYPCOVID1  | -0.036 | 0.031 | -1.165 | 0.244 |
| AGE        | -0.024 | 0.034 | -0.718 | 0.473 |
| MALE       | 0.000  | 0.030 | -0.013 | 0.990 |
| CH_FR      | 0.061  | 0.036 | 1.721  | 0.085 |
| CH_ESP     | 0.028  | 0.034 | 0.812  | 0.417 |
| CH_UK      | 0.028  | 0.037 | 0.759  | 0.448 |
| SYMPERS2   | 0.069  | 0.030 | 2.305  | 0.021 |
| SYMPOTHER2 | 0.026  | 0.030 | 0.848  | 0.396 |
| CONSERV6   | -0.209 | 0.037 | -5.662 | 0.000 |
| UNI4       | 0.194  | 0.036 | 5.312  | 0.000 |
| BENEV2     | -0.006 | 0.034 | -0.165 | 0.869 |
| SOCDESGEN8 | -0.074 | 0.033 | -2.218 | 0.027 |
| SOCDESENV4 | 0.223  | 0.031 | 7.268  | 0.000 |
| COVWORRY2  | 0.027  | 0.033 | 0.818  | 0.413 |
| OUTDOOR    | 0.038  | 0.029 | 1.313  | 0.189 |
| CHANGEOP   | 0.132  | 0.034 | 3.829  | 0.000 |

INTEROTH ON

|            |        |       |        |       |
|------------|--------|-------|--------|-------|
| MEAS_OTH8  | 0.063  | 0.044 | 1.444  | 0.149 |
| MEAS_SELF4 | -0.040 | 0.045 | -0.899 | 0.369 |
| DISTCOV3   | -0.114 | 0.032 | -3.621 | 0.000 |
| HYPCOVID1  | 0.039  | 0.032 | 1.222  | 0.222 |
| AGE        | -0.004 | 0.035 | -0.116 | 0.908 |
| MALE       | 0.073  | 0.031 | 2.374  | 0.018 |
| CH_FR      | -0.144 | 0.036 | -3.939 | 0.000 |
| CH_ESP     | -0.112 | 0.035 | -3.165 | 0.002 |
| CH_UK      | 0.011  | 0.038 | 0.293  | 0.770 |
| SYMPERS2   | -0.067 | 0.031 | -2.163 | 0.031 |
| SYMPOTHER2 | 0.067  | 0.031 | 2.159  | 0.031 |
| CONSERV6   | 0.072  | 0.038 | 1.888  | 0.059 |
| UNI4       | 0.055  | 0.036 | 1.532  | 0.125 |
| BENEV2     | 0.208  | 0.034 | 6.201  | 0.000 |
| SOCDESGEN8 | 0.034  | 0.034 | 0.988  | 0.323 |
| SOCDESENV4 | -0.032 | 0.032 | -0.991 | 0.322 |
| COVWORRY2  | 0.253  | 0.033 | 7.760  | 0.000 |
| OUTDOOR    | 0.062  | 0.030 | 2.050  | 0.040 |
| CHANGEOP   | 0.063  | 0.033 | 1.898  | 0.058 |

DISTCLIM ON

|            |        |       |        |       |
|------------|--------|-------|--------|-------|
| MEAS_OTH8  | 0.150  | 0.038 | 3.910  | 0.000 |
| MEAS_SELF4 | -0.087 | 0.039 | -2.232 | 0.026 |
| DISTCOV3   | 0.158  | 0.028 | 5.739  | 0.000 |
| HYPCOVID1  | 0.104  | 0.027 | 3.774  | 0.000 |

|            |        |       |        |       |
|------------|--------|-------|--------|-------|
| AGE        | -0.055 | 0.031 | -1.783 | 0.075 |
| MALE       | -0.036 | 0.027 | -1.336 | 0.182 |
| CH_FR      | 0.008  | 0.032 | 0.259  | 0.795 |
| CH_ESP     | 0.032  | 0.031 | 1.048  | 0.295 |
| CH_UK      | 0.051  | 0.033 | 1.553  | 0.120 |
| SYMPERS2   | -0.007 | 0.027 | -0.254 | 0.800 |
| SYMPOTHER2 | -0.031 | 0.027 | -1.137 | 0.256 |
| CONSERV6   | -0.093 | 0.033 | -2.780 | 0.005 |
| UNI4       | 0.341  | 0.030 | 11.238 | 0.000 |
| BENEV2     | -0.063 | 0.030 | -2.111 | 0.035 |
| SOCDESGEN8 | -0.157 | 0.030 | -5.264 | 0.000 |
| SOCDESENV4 | 0.071  | 0.028 | 2.526  | 0.012 |
| COVWORRY2  | -0.035 | 0.029 | -1.205 | 0.228 |
| OUTDOOR    | 0.010  | 0.026 | 0.379  | 0.705 |
| CHANGEOP   | 0.333  | 0.029 | 11.605 | 0.000 |

#### MEAS\_OTH ON

|            |        |       |        |       |
|------------|--------|-------|--------|-------|
| AGE        | 0.063  | 0.033 | 1.913  | 0.056 |
| MALE       | -0.062 | 0.030 | -2.096 | 0.036 |
| CH_FR      | -0.040 | 0.036 | -1.138 | 0.255 |
| CH_ESP     | -0.076 | 0.034 | -2.220 | 0.026 |
| CH_UK      | 0.000  | 0.036 | -0.006 | 0.995 |
| SYMPERS2   | 0.051  | 0.030 | 1.707  | 0.088 |
| SYMPOTHER2 | 0.092  | 0.030 | 3.081  | 0.002 |
| CONSERV6   | 0.385  | 0.032 | 11.857 | 0.000 |
| UNI4       | 0.081  | 0.033 | 2.496  | 0.013 |
| BENEV2     | 0.042  | 0.033 | 1.285  | 0.199 |
| SOCDESGEN8 | -0.075 | 0.032 | -2.390 | 0.017 |
| COVWORRY2  | 0.156  | 0.030 | 5.119  | 0.000 |
| OUTDOOR    | -0.029 | 0.029 | -0.992 | 0.321 |

#### MEAS\_SEL ON

|            |        |       |        |       |
|------------|--------|-------|--------|-------|
| AGE        | 0.212  | 0.032 | 6.721  | 0.000 |
| MALE       | -0.077 | 0.029 | -2.690 | 0.007 |
| CH_FR      | -0.033 | 0.034 | -0.954 | 0.340 |
| CH_ESP     | -0.074 | 0.033 | -2.232 | 0.026 |
| CH_UK      | -0.006 | 0.035 | -0.186 | 0.853 |
| SYMPERS2   | -0.006 | 0.029 | -0.219 | 0.826 |
| SYMPOTHER2 | 0.011  | 0.029 | 0.391  | 0.696 |
| CONSERV6   | 0.403  | 0.031 | 12.950 | 0.000 |
| UNI4       | 0.008  | 0.031 | 0.244  | 0.808 |
| BENEV2     | 0.049  | 0.032 | 1.539  | 0.124 |
| SOCDESGEN8 | 0.001  | 0.030 | 0.026  | 0.979 |
| COVWORRY2  | 0.159  | 0.029 | 5.406  | 0.000 |
| OUTDOOR    | -0.018 | 0.028 | -0.625 | 0.532 |

#### DISTCOV3 ON

|       |       |       |       |       |
|-------|-------|-------|-------|-------|
| AGE   | 0.033 | 0.036 | 0.927 | 0.354 |
| MALE  | 0.006 | 0.032 | 0.175 | 0.861 |
| CH_FR | 0.073 | 0.038 | 1.911 | 0.056 |

|            |        |       |        |       |
|------------|--------|-------|--------|-------|
| CH_ESP     | 0.070  | 0.037 | 1.889  | 0.059 |
| CH_UK      | 0.207  | 0.039 | 5.340  | 0.000 |
| SYMPERS2   | 0.064  | 0.032 | 1.987  | 0.047 |
| SYMPOTHER2 | 0.069  | 0.032 | 2.139  | 0.032 |
| CONSERV6   | 0.032  | 0.037 | 0.857  | 0.391 |
| UNI4       | 0.061  | 0.035 | 1.739  | 0.082 |
| BENEV2     | 0.037  | 0.036 | 1.048  | 0.295 |
| SOCDEGEN8  | -0.138 | 0.034 | -4.062 | 0.000 |
| COVWORRY2  | 0.208  | 0.033 | 6.366  | 0.000 |
| OUTDOOR    | 0.037  | 0.032 | 1.153  | 0.249 |

#### HYPCOVID ON

|            |        |       |        |       |
|------------|--------|-------|--------|-------|
| AGE        | -0.070 | 0.036 | -1.921 | 0.055 |
| MALE       | 0.040  | 0.032 | 1.245  | 0.213 |
| CH_FR      | -0.050 | 0.039 | -1.298 | 0.194 |
| CH_ESP     | -0.013 | 0.037 | -0.358 | 0.720 |
| CH_UK      | 0.158  | 0.039 | 4.004  | 0.000 |
| SYMPERS2   | -0.027 | 0.033 | -0.813 | 0.416 |
| SYMPOTHER2 | 0.051  | 0.033 | 1.556  | 0.120 |
| CONSERV6   | 0.145  | 0.037 | 3.908  | 0.000 |
| UNI4       | 0.039  | 0.036 | 1.101  | 0.271 |
| BENEV2     | 0.002  | 0.036 | 0.047  | 0.963 |
| SOCDEGEN8  | 0.035  | 0.035 | 1.006  | 0.314 |
| COVWORRY2  | 0.233  | 0.033 | 7.116  | 0.000 |
| OUTDOOR    | 0.023  | 0.032 | 0.718  | 0.473 |

#### CHANGEOP ON

|            |        |       |        |       |
|------------|--------|-------|--------|-------|
| AGE        | -0.005 | 0.035 | -0.141 | 0.887 |
| MALE       | -0.095 | 0.031 | -3.053 | 0.002 |
| CH_FR      | 0.073  | 0.037 | 1.959  | 0.050 |
| CH_ESP     | 0.079  | 0.036 | 2.187  | 0.029 |
| CH_UK      | -0.049 | 0.038 | -1.289 | 0.197 |
| SYMPERS2   | 0.004  | 0.032 | 0.133  | 0.895 |
| SYMPOTHER2 | -0.068 | 0.031 | -2.155 | 0.031 |
| CONSERV6   | 0.035  | 0.036 | 0.980  | 0.327 |
| UNI4       | 0.350  | 0.033 | 10.675 | 0.000 |
| BENEV2     | -0.076 | 0.035 | -2.181 | 0.029 |
| SOCDEGEN8  | 0.011  | 0.033 | 0.324  | 0.746 |
| COVWORRY2  | 0.122  | 0.032 | 3.799  | 0.000 |
| OUTDOOR    | -0.034 | 0.031 | -1.112 | 0.266 |

#### MEAS\_OTH WITH

|            |       |       |        |       |
|------------|-------|-------|--------|-------|
| MEAS_SELF4 | 0.615 | 0.021 | 29.758 | 0.000 |
|------------|-------|-------|--------|-------|

#### Intercepts

|           |        |       |        |       |
|-----------|--------|-------|--------|-------|
| PBCL4     | -2.159 | 0.351 | -6.148 | 0.000 |
| DISTCOV3  | 2.424  | 0.364 | 6.651  | 0.000 |
| HYPCOVID1 | 3.239  | 0.381 | 8.497  | 0.000 |
| DISTCLIM6 | 0.940  | 0.328 | 2.865  | 0.004 |
| MEAS_OTH8 | 2.482  | 0.346 | 7.164  | 0.000 |

|            |       |       |       |       |
|------------|-------|-------|-------|-------|
| MEAS_SELF4 | 0.511 | 0.316 | 1.619 | 0.106 |
| INTEROTH6  | 1.982 | 0.387 | 5.125 | 0.000 |
| CHANGEOP   | 0.723 | 0.345 | 2.093 | 0.036 |

#### Residual Variances

|            |       |       |        |       |
|------------|-------|-------|--------|-------|
| PBCL4      | 0.719 | 0.025 | 28.546 | 0.000 |
| DISTCOV3   | 0.870 | 0.021 | 41.752 | 0.000 |
| HYPCOVID1  | 0.878 | 0.020 | 42.916 | 0.000 |
| DISTCLIM6  | 0.588 | 0.025 | 23.661 | 0.000 |
| MEAS_OTH8  | 0.742 | 0.025 | 29.621 | 0.000 |
| MEAS_SELF4 | 0.687 | 0.026 | 26.926 | 0.000 |
| INTEROTH6  | 0.779 | 0.024 | 31.981 | 0.000 |
| CHANGEOP   | 0.807 | 0.024 | 34.131 | 0.000 |

#### R-SQUARE

| Observed<br>Variable | Estimate | S.E.  | Two-Tailed<br>Est./S.E. | P-Value |
|----------------------|----------|-------|-------------------------|---------|
| PBCL4                | 0.281    | 0.025 | 11.172                  | 0.000   |
| DISTCOV3             | 0.130    | 0.021 | 6.243                   | 0.000   |
| HYPCOVID             | 0.122    | 0.020 | 5.952                   | 0.000   |
| DISTCLIM             | 0.412    | 0.025 | 16.563                  | 0.000   |
| MEAS_OTH             | 0.258    | 0.025 | 10.322                  | 0.000   |
| MEAS_SEL             | 0.313    | 0.026 | 12.253                  | 0.000   |
| INTEROTH             | 0.221    | 0.024 | 9.094                   | 0.000   |
| CHANGEOP             | 0.193    | 0.024 | 8.146                   | 0.000   |

#### STANDARDIZED TOTAL, TOTAL INDIRECT, SPECIFIC INDIRECT, AND DIRECT EFFECTS

#### STDYX Standardization

| Estimate | S.E. | Two-Tailed<br>Est./S.E. | P-Value |
|----------|------|-------------------------|---------|
|----------|------|-------------------------|---------|

#### Effects from MEAS\_OTH to PBCL4

|                |       |       |       |       |
|----------------|-------|-------|-------|-------|
| Total          | 0.056 | 0.043 | 1.311 | 0.190 |
| Total indirect | 0.033 | 0.010 | 3.263 | 0.001 |

#### Specific indirect 1

|          |       |       |       |       |
|----------|-------|-------|-------|-------|
| PBCL4    |       |       |       |       |
| DISTCLIM |       |       |       |       |
| MEAS_OTH | 0.032 | 0.010 | 3.263 | 0.001 |

#### Specific indirect 2

|       |  |
|-------|--|
| PBCL4 |  |
|-------|--|

|          |       |       |       |       |
|----------|-------|-------|-------|-------|
| INTEROTH |       |       |       |       |
| MEAS_OTH | 0.001 | 0.002 | 0.271 | 0.787 |

|          |       |       |       |       |
|----------|-------|-------|-------|-------|
| Direct   |       |       |       |       |
| PBCL4    |       |       |       |       |
| MEAS_OTH | 0.024 | 0.042 | 0.555 | 0.579 |

#### Effects from MEAS\_SEL to PBCL4

|                |        |       |        |       |
|----------------|--------|-------|--------|-------|
| Total          | -0.022 | 0.044 | -0.489 | 0.625 |
| Total indirect | -0.019 | 0.009 | -2.105 | 0.035 |

|                     |        |       |        |       |
|---------------------|--------|-------|--------|-------|
| Specific indirect 1 |        |       |        |       |
| PBCL4               |        |       |        |       |
| DISTCLIM            |        |       |        |       |
| MEAS_SEL            | -0.019 | 0.009 | -2.085 | 0.037 |

|                     |       |       |        |       |
|---------------------|-------|-------|--------|-------|
| Specific indirect 2 |       |       |        |       |
| PBCL4               |       |       |        |       |
| INTEROTH            |       |       |        |       |
| MEAS_SEL            | 0.000 | 0.001 | -0.264 | 0.792 |

|          |        |       |        |       |
|----------|--------|-------|--------|-------|
| Direct   |        |       |        |       |
| PBCL4    |        |       |        |       |
| MEAS_SEL | -0.002 | 0.043 | -0.056 | 0.955 |

#### Effects from DISTCOV3 to PBCL4

|                |       |       |       |       |
|----------------|-------|-------|-------|-------|
| Total          | 0.006 | 0.031 | 0.207 | 0.836 |
| Total indirect | 0.033 | 0.009 | 3.600 | 0.000 |

|                     |       |       |       |       |
|---------------------|-------|-------|-------|-------|
| Specific indirect 1 |       |       |       |       |
| PBCL4               |       |       |       |       |
| DISTCLIM            |       |       |       |       |
| DISTCOV3            | 0.034 | 0.008 | 4.099 | 0.000 |

|                     |        |       |        |       |
|---------------------|--------|-------|--------|-------|
| Specific indirect 2 |        |       |        |       |
| PBCL4               |        |       |        |       |
| INTEROTH            |        |       |        |       |
| DISTCOV3            | -0.001 | 0.004 | -0.275 | 0.783 |

|          |        |       |        |       |
|----------|--------|-------|--------|-------|
| Direct   |        |       |        |       |
| PBCL4    |        |       |        |       |
| DISTCOV3 | -0.026 | 0.031 | -0.845 | 0.398 |

#### Effects from HYPCOVID to PBCL4

|                |        |       |        |       |
|----------------|--------|-------|--------|-------|
| Total          | -0.013 | 0.031 | -0.422 | 0.673 |
| Total indirect | 0.023  | 0.007 | 3.183  | 0.001 |

Specific indirect 1

|          |       |       |       |       |
|----------|-------|-------|-------|-------|
| PBCL4    |       |       |       |       |
| DISTCLIM |       |       |       |       |
| HYPCOVID | 0.022 | 0.007 | 3.174 | 0.002 |

Specific indirect 2

|          |       |       |       |       |
|----------|-------|-------|-------|-------|
| PBCL4    |       |       |       |       |
| INTEROTH |       |       |       |       |
| HYPCOVID | 0.000 | 0.001 | 0.269 | 0.788 |

Direct

|          |        |       |        |       |
|----------|--------|-------|--------|-------|
| PBCL4    |        |       |        |       |
| HYPCOVID | -0.036 | 0.031 | -1.165 | 0.244 |

STDYX Standardization

|  | Lower .5% | Lower 2.5% | Lower 5% | Estimate | Upper 5% | Upper 2.5% | Upper .5% |
|--|-----------|------------|----------|----------|----------|------------|-----------|
|--|-----------|------------|----------|----------|----------|------------|-----------|

PBCL4 ON

|            |        |        |        |        |        |        |        |
|------------|--------|--------|--------|--------|--------|--------|--------|
| INTEROTH6  | -0.073 | -0.054 | -0.044 | 0.009  | 0.061  | 0.071  | 0.091  |
| DISTCLIM6  | 0.121  | 0.143  | 0.155  | 0.214  | 0.274  | 0.286  | 0.308  |
| MEAS_OTH8  | -0.086 | -0.060 | -0.046 | 0.024  | 0.093  | 0.107  | 0.133  |
| MEAS_SELF4 | -0.114 | -0.087 | -0.074 | -0.002 | 0.069  | 0.082  | 0.109  |
| DISTCOV3   | -0.107 | -0.088 | -0.078 | -0.026 | 0.025  | 0.035  | 0.054  |
| HYPCOVID1  | -0.114 | -0.095 | -0.086 | -0.036 | 0.015  | 0.024  | 0.043  |
| AGE        | -0.112 | -0.091 | -0.080 | -0.024 | 0.031  | 0.042  | 0.063  |
| MALE       | -0.077 | -0.059 | -0.049 | 0.000  | 0.049  | 0.058  | 0.076  |
| CH_FR      | -0.030 | -0.008 | 0.003  | 0.061  | 0.120  | 0.131  | 0.153  |
| CH_ESP     | -0.061 | -0.040 | -0.029 | 0.028  | 0.085  | 0.095  | 0.117  |
| CH_UK      | -0.067 | -0.044 | -0.032 | 0.028  | 0.088  | 0.100  | 0.122  |
| SYMPERS2   | -0.008 | 0.010  | 0.020  | 0.069  | 0.118  | 0.127  | 0.145  |
| SYMPOTHER2 | -0.052 | -0.033 | -0.024 | 0.026  | 0.075  | 0.085  | 0.103  |
| CONSERV6   | -0.304 | -0.281 | -0.270 | -0.209 | -0.148 | -0.137 | -0.114 |
| UNI4       | 0.100  | 0.122  | 0.134  | 0.194  | 0.254  | 0.265  | 0.288  |
| BENEV2     | -0.092 | -0.071 | -0.061 | -0.006 | 0.050  | 0.060  | 0.081  |
| SOCDESGEN8 | -0.161 | -0.140 | -0.129 | -0.074 | -0.019 | -0.009 | 0.012  |
| SOCDESENV4 | 0.144  | 0.163  | 0.173  | 0.223  | 0.274  | 0.284  | 0.303  |
| COVWORRY2  | -0.058 | -0.038 | -0.027 | 0.027  | 0.081  | 0.092  | 0.112  |
| OUTDOOR    | -0.037 | -0.019 | -0.010 | 0.038  | 0.086  | 0.095  | 0.113  |
| CHANGEOP   | 0.043  | 0.064  | 0.075  | 0.132  | 0.189  | 0.199  | 0.221  |

INTEROTH ON

|           |        |        |        |       |       |       |       |
|-----------|--------|--------|--------|-------|-------|-------|-------|
| MEAS_OTH8 | -0.049 | -0.023 | -0.009 | 0.063 | 0.135 | 0.149 | 0.176 |
|-----------|--------|--------|--------|-------|-------|-------|-------|

|            |        |        |        |        |        |        |        |
|------------|--------|--------|--------|--------|--------|--------|--------|
| MEAS_SELF4 | -0.156 | -0.128 | -0.114 | -0.040 | 0.034  | 0.048  | 0.075  |
| DISTCOV3   | -0.196 | -0.176 | -0.166 | -0.114 | -0.062 | -0.052 | -0.033 |
| HYPCOVID1  | -0.043 | -0.023 | -0.013 | 0.039  | 0.090  | 0.100  | 0.120  |
| AGE        | -0.095 | -0.073 | -0.062 | -0.004 | 0.054  | 0.065  | 0.087  |
| MALE       | -0.006 | 0.013  | 0.022  | 0.073  | 0.124  | 0.133  | 0.152  |
| CH_FR      | -0.238 | -0.215 | -0.204 | -0.144 | -0.084 | -0.072 | -0.050 |
| CH_ESP     | -0.204 | -0.182 | -0.171 | -0.112 | -0.054 | -0.043 | -0.021 |
| CH_UK      | -0.087 | -0.063 | -0.051 | 0.011  | 0.074  | 0.086  | 0.109  |
| SYMPERS2   | -0.146 | -0.127 | -0.118 | -0.067 | -0.016 | -0.006 | 0.013  |
| SYMPOTHER2 | -0.013 | 0.006  | 0.016  | 0.067  | 0.119  | 0.129  | 0.148  |
| CONSERV6   | -0.026 | -0.003 | 0.009  | 0.072  | 0.135  | 0.148  | 0.171  |
| UNI4       | -0.038 | -0.015 | -0.004 | 0.055  | 0.114  | 0.126  | 0.148  |
| BENEV2     | 0.122  | 0.143  | 0.153  | 0.208  | 0.264  | 0.274  | 0.295  |
| SOCDEGEN8  | -0.055 | -0.033 | -0.023 | 0.034  | 0.090  | 0.101  | 0.122  |
| SOCDESENV4 | -0.115 | -0.095 | -0.085 | -0.032 | 0.021  | 0.031  | 0.051  |
| COVWORRY2  | 0.169  | 0.189  | 0.200  | 0.253  | 0.307  | 0.317  | 0.338  |
| OUTDOOR    | -0.016 | 0.003  | 0.012  | 0.062  | 0.111  | 0.121  | 0.139  |
| CHANGEOP   | -0.023 | -0.002 | 0.008  | 0.063  | 0.118  | 0.129  | 0.150  |

#### DISTCLIM ON

|            |        |        |        |        |        |        |        |
|------------|--------|--------|--------|--------|--------|--------|--------|
| MEAS_OTH8  | 0.051  | 0.075  | 0.087  | 0.150  | 0.212  | 0.224  | 0.248  |
| MEAS_SELF4 | -0.188 | -0.164 | -0.152 | -0.087 | -0.023 | -0.011 | 0.013  |
| DISTCOV3   | 0.087  | 0.104  | 0.113  | 0.158  | 0.203  | 0.212  | 0.229  |
| HYPCOVID1  | 0.033  | 0.050  | 0.058  | 0.104  | 0.149  | 0.158  | 0.174  |
| AGE        | -0.134 | -0.115 | -0.105 | -0.055 | -0.004 | 0.005  | 0.024  |
| MALE       | -0.105 | -0.088 | -0.080 | -0.036 | 0.008  | 0.017  | 0.033  |
| CH_FR      | -0.074 | -0.054 | -0.044 | 0.008  | 0.061  | 0.071  | 0.090  |
| CH_ESP     | -0.047 | -0.028 | -0.018 | 0.032  | 0.083  | 0.093  | 0.112  |
| CH_UK      | -0.034 | -0.013 | -0.003 | 0.051  | 0.106  | 0.116  | 0.137  |
| SYMPERS2   | -0.076 | -0.060 | -0.051 | -0.007 | 0.037  | 0.046  | 0.063  |
| SYMPOTHER2 | -0.101 | -0.084 | -0.076 | -0.031 | 0.014  | 0.022  | 0.039  |
| CONSERV6   | -0.179 | -0.159 | -0.148 | -0.093 | -0.038 | -0.027 | -0.007 |
| UNI4       | 0.263  | 0.282  | 0.292  | 0.341  | 0.391  | 0.401  | 0.420  |
| BENEV2     | -0.139 | -0.121 | -0.111 | -0.063 | -0.014 | -0.004 | 0.014  |
| SOCDEGEN8  | -0.233 | -0.215 | -0.206 | -0.157 | -0.108 | -0.098 | -0.080 |
| SOCDESENV4 | -0.001 | 0.016  | 0.025  | 0.071  | 0.117  | 0.126  | 0.143  |
| COVWORRY2  | -0.110 | -0.092 | -0.083 | -0.035 | 0.013  | 0.022  | 0.040  |
| OUTDOOR    | -0.058 | -0.041 | -0.033 | 0.010  | 0.053  | 0.061  | 0.077  |
| CHANGEOP   | 0.259  | 0.277  | 0.286  | 0.333  | 0.380  | 0.389  | 0.407  |

#### MEAS\_OTH ON

|            |        |        |        |        |        |        |       |
|------------|--------|--------|--------|--------|--------|--------|-------|
| AGE        | -0.022 | -0.002 | 0.009  | 0.063  | 0.118  | 0.128  | 0.149 |
| MALE       | -0.139 | -0.121 | -0.111 | -0.062 | -0.013 | -0.004 | 0.014 |
| CH_FR      | -0.132 | -0.110 | -0.099 | -0.040 | 0.018  | 0.029  | 0.051 |
| CH_ESP     | -0.165 | -0.144 | -0.133 | -0.076 | -0.020 | -0.009 | 0.012 |
| CH_UK      | -0.094 | -0.071 | -0.060 | 0.000  | 0.059  | 0.071  | 0.093 |
| SYMPERS2   | -0.026 | -0.008 | 0.002  | 0.051  | 0.101  | 0.110  | 0.128 |
| SYMPOTHER2 | 0.015  | 0.034  | 0.043  | 0.092  | 0.141  | 0.151  | 0.169 |
| CONSERV6   | 0.301  | 0.321  | 0.332  | 0.385  | 0.439  | 0.449  | 0.469 |
| UNI4       | -0.003 | 0.017  | 0.028  | 0.081  | 0.135  | 0.146  | 0.166 |



|            |        |        |        |        |        |        |       |
|------------|--------|--------|--------|--------|--------|--------|-------|
| BENEV2     | -0.043 | -0.022 | -0.012 | 0.042  | 0.097  | 0.107  | 0.127 |
| SOCDESGEN8 | -0.157 | -0.137 | -0.127 | -0.075 | -0.024 | -0.014 | 0.006 |
| COVWORRY2  | 0.078  | 0.096  | 0.106  | 0.156  | 0.206  | 0.216  | 0.235 |
| OUTDOOR    | -0.105 | -0.087 | -0.077 | -0.029 | 0.019  | 0.028  | 0.046 |

#### MEAS\_SEL ON

|            |        |        |        |        |        |        |        |
|------------|--------|--------|--------|--------|--------|--------|--------|
| AGE        | 0.131  | 0.150  | 0.160  | 0.212  | 0.264  | 0.274  | 0.294  |
| MALE       | -0.151 | -0.133 | -0.124 | -0.077 | -0.030 | -0.021 | -0.003 |
| CH_FR      | -0.121 | -0.100 | -0.089 | -0.033 | 0.024  | 0.034  | 0.055  |
| CH_ESP     | -0.159 | -0.139 | -0.128 | -0.074 | -0.019 | -0.009 | 0.011  |
| CH_UK      | -0.096 | -0.075 | -0.064 | -0.006 | 0.051  | 0.062  | 0.083  |
| SYMPERS2   | -0.081 | -0.063 | -0.054 | -0.006 | 0.041  | 0.050  | 0.068  |
| SYMPOTHER2 | -0.063 | -0.045 | -0.036 | 0.011  | 0.059  | 0.068  | 0.086  |
| CONSERV6   | 0.323  | 0.342  | 0.352  | 0.403  | 0.454  | 0.464  | 0.483  |
| UNI4       | -0.073 | -0.054 | -0.044 | 0.008  | 0.059  | 0.069  | 0.089  |
| BENEV2     | -0.033 | -0.013 | -0.003 | 0.049  | 0.101  | 0.111  | 0.131  |
| SOCDESGEN8 | -0.078 | -0.059 | -0.049 | 0.001  | 0.051  | 0.060  | 0.079  |
| COVWORRY2  | 0.083  | 0.101  | 0.111  | 0.159  | 0.207  | 0.216  | 0.235  |
| OUTDOOR    | -0.090 | -0.073 | -0.064 | -0.018 | 0.029  | 0.038  | 0.055  |

#### DISTCOV3 ON

|            |        |        |        |        |        |        |        |
|------------|--------|--------|--------|--------|--------|--------|--------|
| AGE        | -0.059 | -0.037 | -0.026 | 0.033  | 0.092  | 0.104  | 0.126  |
| MALE       | -0.077 | -0.058 | -0.047 | 0.006  | 0.059  | 0.069  | 0.089  |
| CH_FR      | -0.026 | -0.002 | 0.010  | 0.073  | 0.137  | 0.149  | 0.172  |
| CH_ESP     | -0.026 | -0.003 | 0.009  | 0.070  | 0.131  | 0.143  | 0.166  |
| CH_UK      | 0.107  | 0.131  | 0.143  | 0.207  | 0.271  | 0.283  | 0.307  |
| SYMPERS2   | -0.019 | 0.001  | 0.011  | 0.064  | 0.118  | 0.128  | 0.148  |
| SYMPOTHER2 | -0.014 | 0.006  | 0.016  | 0.069  | 0.123  | 0.133  | 0.153  |
| CONSERV6   | -0.063 | -0.041 | -0.029 | 0.032  | 0.092  | 0.104  | 0.127  |
| UNI4       | -0.030 | -0.008 | 0.003  | 0.061  | 0.120  | 0.131  | 0.153  |
| BENEV2     | -0.055 | -0.033 | -0.021 | 0.037  | 0.096  | 0.108  | 0.130  |
| SOCDESGEN8 | -0.226 | -0.205 | -0.194 | -0.138 | -0.082 | -0.072 | -0.051 |
| COVWORRY2  | 0.124  | 0.144  | 0.154  | 0.208  | 0.262  | 0.272  | 0.293  |
| OUTDOOR    | -0.045 | -0.026 | -0.016 | 0.037  | 0.089  | 0.099  | 0.118  |

#### HYPCOVID ON

|            |        |        |        |        |        |       |       |
|------------|--------|--------|--------|--------|--------|-------|-------|
| AGE        | -0.164 | -0.141 | -0.130 | -0.070 | -0.010 | 0.001 | 0.024 |
| MALE       | -0.043 | -0.023 | -0.013 | 0.040  | 0.094  | 0.104 | 0.124 |
| CH_FR      | -0.151 | -0.127 | -0.114 | -0.050 | 0.014  | 0.026 | 0.050 |
| CH_ESP     | -0.110 | -0.087 | -0.075 | -0.013 | 0.048  | 0.060 | 0.083 |
| CH_UK      | 0.056  | 0.080  | 0.093  | 0.158  | 0.222  | 0.235 | 0.259 |
| SYMPERS2   | -0.111 | -0.091 | -0.080 | -0.027 | 0.027  | 0.037 | 0.058 |
| SYMPOTHER2 | -0.033 | -0.013 | -0.003 | 0.051  | 0.105  | 0.115 | 0.135 |
| CONSERV6   | 0.049  | 0.072  | 0.084  | 0.145  | 0.205  | 0.217 | 0.240 |
| UNI4       | -0.053 | -0.031 | -0.019 | 0.039  | 0.098  | 0.109 | 0.131 |
| BENEV2     | -0.092 | -0.069 | -0.058 | 0.002  | 0.061  | 0.073 | 0.095 |
| SOCDESGEN8 | -0.054 | -0.033 | -0.022 | 0.035  | 0.092  | 0.103 | 0.124 |
| COVWORRY2  | 0.149  | 0.169  | 0.179  | 0.233  | 0.287  | 0.297 | 0.317 |
| OUTDOOR    | -0.059 | -0.040 | -0.030 | 0.023  | 0.076  | 0.086 | 0.105 |

# CHANGEOP ON

|            |        |        |        |        |        |        |        |
|------------|--------|--------|--------|--------|--------|--------|--------|
| AGE        | -0.095 | -0.073 | -0.062 | -0.005 | 0.052  | 0.063  | 0.085  |
| MALE       | -0.175 | -0.156 | -0.146 | -0.095 | -0.044 | -0.034 | -0.015 |
| CH_FR      | -0.023 | 0.000  | 0.012  | 0.073  | 0.134  | 0.146  | 0.169  |
| CH_ESP     | -0.014 | 0.008  | 0.020  | 0.079  | 0.138  | 0.150  | 0.172  |
| CH_UK      | -0.147 | -0.123 | -0.111 | -0.049 | 0.014  | 0.025  | 0.049  |
| SYMPERS2   | -0.078 | -0.058 | -0.048 | 0.004  | 0.056  | 0.066  | 0.086  |
| SYMPOTHER2 | -0.149 | -0.129 | -0.119 | -0.068 | -0.016 | -0.006 | 0.013  |
| CONSERV6   | -0.057 | -0.035 | -0.024 | 0.035  | 0.094  | 0.105  | 0.128  |
| UNI4       | 0.265  | 0.286  | 0.296  | 0.350  | 0.404  | 0.414  | 0.434  |
| BENEV2     | -0.166 | -0.144 | -0.133 | -0.076 | -0.019 | -0.008 | 0.014  |
| SOCDEGEN8  | -0.075 | -0.054 | -0.044 | 0.011  | 0.065  | 0.076  | 0.096  |
| COVWORRY2  | 0.039  | 0.059  | 0.069  | 0.122  | 0.174  | 0.185  | 0.204  |
| OUTDOOR    | -0.113 | -0.094 | -0.084 | -0.034 | 0.016  | 0.026  | 0.045  |

# MEAS\_OTH WITH

|            |       |       |       |       |       |       |       |
|------------|-------|-------|-------|-------|-------|-------|-------|
| MEAS_SELF4 | 0.562 | 0.574 | 0.581 | 0.615 | 0.649 | 0.655 | 0.668 |
|------------|-------|-------|-------|-------|-------|-------|-------|

# Intercepts

|          |        |        |        |        |        |        |        |
|----------|--------|--------|--------|--------|--------|--------|--------|
| PBCL4    | -3.064 | -2.848 | -2.737 | -2.159 | -1.581 | -1.471 | -1.255 |
| DISTCOV3 | 1.485  | 1.709  | 1.824  | 2.424  | 3.023  | 3.138  | 3.362  |
| HYPCOVID | 2.257  | 2.492  | 2.612  | 3.239  | 3.867  | 3.987  | 4.221  |
| DISTCLIM | 0.095  | 0.297  | 0.400  | 0.940  | 1.479  | 1.583  | 1.785  |
| MEAS_OTH | 1.590  | 1.803  | 1.912  | 2.482  | 3.052  | 3.161  | 3.374  |
| MEAS_SEL | -0.302 | -0.108 | -0.008 | 0.511  | 1.031  | 1.131  | 1.325  |
| INTEROTH | 0.986  | 1.224  | 1.346  | 1.982  | 2.618  | 2.740  | 2.978  |
| CHANGEOP | -0.167 | 0.046  | 0.155  | 0.723  | 1.291  | 1.399  | 1.612  |

# Residual Variances

|          |       |       |       |       |       |       |       |
|----------|-------|-------|-------|-------|-------|-------|-------|
| PBCL4    | 0.654 | 0.669 | 0.677 | 0.719 | 0.760 | 0.768 | 0.784 |
| DISTCOV3 | 0.816 | 0.829 | 0.836 | 0.870 | 0.904 | 0.911 | 0.924 |
| HYPCOVID | 0.825 | 0.838 | 0.845 | 0.878 | 0.912 | 0.918 | 0.931 |
| DISTCLIM | 0.524 | 0.540 | 0.547 | 0.588 | 0.629 | 0.637 | 0.652 |
| MEAS_OTH | 0.677 | 0.693 | 0.700 | 0.742 | 0.783 | 0.791 | 0.806 |
| MEAS_SEL | 0.622 | 0.637 | 0.645 | 0.687 | 0.729 | 0.737 | 0.753 |
| INTEROTH | 0.716 | 0.731 | 0.739 | 0.779 | 0.819 | 0.826 | 0.841 |
| CHANGEOP | 0.746 | 0.761 | 0.768 | 0.807 | 0.846 | 0.854 | 0.868 |

# CONFIDENCE INTERVALS OF STANDARDIZED TOTAL, TOTAL INDIRECT, SPECIFIC INDIRECT, AND DIRECT EFFECTS

# STDYX Standardization

Lower .5% Lower 2.5% Lower 5% Estimate Upper 5% Upper 2.5% Upper .5%

Effects from MEAS\_OTH to PBCL4

|                |        |        |        |       |       |       |       |
|----------------|--------|--------|--------|-------|-------|-------|-------|
| Total          | -0.054 | -0.028 | -0.014 | 0.056 | 0.127 | 0.140 | 0.166 |
| Total indirect | 0.007  | 0.013  | 0.016  | 0.033 | 0.049 | 0.052 | 0.058 |

Specific indirect 1

|          |       |       |       |       |       |       |       |
|----------|-------|-------|-------|-------|-------|-------|-------|
| PBCL4    |       |       |       |       |       |       |       |
| DISTCLIM |       |       |       |       |       |       |       |
| MEAS_OTH | 0.007 | 0.013 | 0.016 | 0.032 | 0.048 | 0.051 | 0.057 |

Specific indirect 2

|          |        |        |        |       |       |       |       |
|----------|--------|--------|--------|-------|-------|-------|-------|
| PBCL4    |        |        |        |       |       |       |       |
| INTEROTH |        |        |        |       |       |       |       |
| MEAS_OTH | -0.005 | -0.003 | -0.003 | 0.001 | 0.004 | 0.005 | 0.006 |

Direct

|          |        |        |        |       |       |       |       |
|----------|--------|--------|--------|-------|-------|-------|-------|
| PBCL4    |        |        |        |       |       |       |       |
| MEAS_OTH | -0.086 | -0.060 | -0.046 | 0.024 | 0.093 | 0.107 | 0.133 |

Effects from MEAS\_SEL to PBCL4

|                |        |        |        |        |        |        |       |
|----------------|--------|--------|--------|--------|--------|--------|-------|
| Total          | -0.135 | -0.108 | -0.094 | -0.022 | 0.051  | 0.065  | 0.092 |
| Total indirect | -0.042 | -0.037 | -0.034 | -0.019 | -0.004 | -0.001 | 0.004 |

Specific indirect 1

|          |        |        |        |        |        |        |       |
|----------|--------|--------|--------|--------|--------|--------|-------|
| PBCL4    |        |        |        |        |        |        |       |
| DISTCLIM |        |        |        |        |        |        |       |
| MEAS_SEL | -0.042 | -0.036 | -0.033 | -0.019 | -0.004 | -0.001 | 0.004 |

Specific indirect 2

|          |        |        |        |       |       |       |       |
|----------|--------|--------|--------|-------|-------|-------|-------|
| PBCL4    |        |        |        |       |       |       |       |
| INTEROTH |        |        |        |       |       |       |       |
| MEAS_SEL | -0.004 | -0.003 | -0.003 | 0.000 | 0.002 | 0.002 | 0.003 |

Direct

|          |        |        |        |        |       |       |       |
|----------|--------|--------|--------|--------|-------|-------|-------|
| PBCL4    |        |        |        |        |       |       |       |
| MEAS_SEL | -0.114 | -0.087 | -0.074 | -0.002 | 0.069 | 0.082 | 0.109 |

Effects from DISTCOV3 to PBCL4

|                |        |        |        |       |       |       |       |
|----------------|--------|--------|--------|-------|-------|-------|-------|
| Total          | -0.074 | -0.054 | -0.045 | 0.006 | 0.058 | 0.067 | 0.086 |
| Total indirect | 0.009  | 0.015  | 0.018  | 0.033 | 0.048 | 0.051 | 0.056 |

Specific indirect 1

|          |       |       |       |       |       |       |       |
|----------|-------|-------|-------|-------|-------|-------|-------|
| PBCL4    |       |       |       |       |       |       |       |
| DISTCLIM |       |       |       |       |       |       |       |
| DISTCOV3 | 0.013 | 0.018 | 0.020 | 0.034 | 0.047 | 0.050 | 0.055 |

Specific indirect 2

|       |  |
|-------|--|
| PBCL4 |  |
|-------|--|

|          |        |        |        |        |       |       |       |
|----------|--------|--------|--------|--------|-------|-------|-------|
| INTEROTH |        |        |        |        |       |       |       |
| DISTCOV3 | -0.010 | -0.008 | -0.007 | -0.001 | 0.005 | 0.006 | 0.008 |

Direct

|          |        |        |        |        |       |       |       |
|----------|--------|--------|--------|--------|-------|-------|-------|
| PBCL4    |        |        |        |        |       |       |       |
| DISTCOV3 | -0.107 | -0.088 | -0.078 | -0.026 | 0.025 | 0.035 | 0.054 |

Effects from HYPCOVID to PBCL4

|                |        |        |        |        |       |       |       |
|----------------|--------|--------|--------|--------|-------|-------|-------|
| Total          | -0.093 | -0.074 | -0.064 | -0.013 | 0.038 | 0.047 | 0.066 |
| Total indirect | 0.004  | 0.009  | 0.011  | 0.023  | 0.034 | 0.036 | 0.041 |

Specific indirect 1

|          |       |       |       |       |       |       |       |
|----------|-------|-------|-------|-------|-------|-------|-------|
| PBCL4    |       |       |       |       |       |       |       |
| DISTCLIM |       |       |       |       |       |       |       |
| HYPCOVID | 0.004 | 0.009 | 0.011 | 0.022 | 0.034 | 0.036 | 0.040 |

Specific indirect 2

|          |        |        |        |       |       |       |       |
|----------|--------|--------|--------|-------|-------|-------|-------|
| PBCL4    |        |        |        |       |       |       |       |
| INTEROTH |        |        |        |       |       |       |       |
| HYPCOVID | -0.003 | -0.002 | -0.002 | 0.000 | 0.002 | 0.003 | 0.004 |

Direct

|          |        |        |        |        |       |       |       |
|----------|--------|--------|--------|--------|-------|-------|-------|
| PBCL4    |        |        |        |        |       |       |       |
| HYPCOVID | -0.114 | -0.095 | -0.086 | -0.036 | 0.015 | 0.024 | 0.043 |

Predicting Class 1: the strongly disengaged

#### MODEL FIT INFORMATION

Number of Free Parameters 141

Loglikelihood

|          |           |
|----------|-----------|
| H0 Value | -8375.806 |
| H1 Value | -8341.815 |

Information Criteria

|                          |           |
|--------------------------|-----------|
| Akaike (AIC)             | 17033.611 |
| Bayesian (BIC)           | 17711.841 |
| Sample-Size Adjusted BIC | 17264.046 |
| (n* = (n + 2) / 24)      |           |

Chi-Square Test of Model Fit

|                    |        |
|--------------------|--------|
| Value              | 67.982 |
| Degrees of Freedom | 15     |
| P-Value            | 0.0000 |

# RMSEA (Root Mean Square Error Of Approximation)

|                          |             |
|--------------------------|-------------|
| Estimate                 | 0.062       |
| 90 Percent C.I.          | 0.048 0.078 |
| Probability RMSEA <= .05 | 0.080       |

## CFI/TLI

|     |       |
|-----|-------|
| CFI | 0.978 |
| TLI | 0.797 |

## Chi-Square Test of Model Fit for the Baseline Model

|                    |          |
|--------------------|----------|
| Value              | 2571.903 |
| Degrees of Freedom | 140      |
| P-Value            | 0.0000   |

## SRMR (Standardized Root Mean Square Residual)

|       |       |
|-------|-------|
| Value | 0.023 |
|-------|-------|

## STANDARDIZED MODEL RESULTS

### STDYX Standardization

|            | Estimate | S.E.  | Two-Tailed<br>Est./S.E. | P-Value |
|------------|----------|-------|-------------------------|---------|
| PBCL1 ON   |          |       |                         |         |
| INTEROTH6  | -0.033   | 0.032 | -1.047                  | 0.295   |
| DISTCLIM6  | -0.280   | 0.036 | -7.791                  | 0.000   |
| MEAS_OTH8  | -0.073   | 0.043 | -1.728                  | 0.084   |
| MEAS_SELF4 | 0.022    | 0.043 | 0.510                   | 0.610   |
| DISTCOV3   | 0.004    | 0.031 | 0.131                   | 0.896   |
| HYPCOVID1  | 0.053    | 0.031 | 1.728                   | 0.084   |
| AGE        | 0.013    | 0.034 | 0.388                   | 0.698   |
| MALE       | 0.005    | 0.030 | 0.166                   | 0.869   |
| CH_FR      | 0.073    | 0.036 | 2.044                   | 0.041   |
| CH_ESP     | 0.117    | 0.034 | 3.406                   | 0.001   |
| CH_UK      | 0.171    | 0.036 | 4.698                   | 0.000   |
| SYMPERS2   | -0.019   | 0.030 | -0.626                  | 0.531   |
| SYMPOTHER2 | 0.002    | 0.030 | 0.079                   | 0.937   |
| CONSERV6   | 0.090    | 0.037 | 2.421                   | 0.015   |
| UNI4       | -0.222   | 0.036 | -6.105                  | 0.000   |
| BENEV2     | 0.006    | 0.034 | 0.184                   | 0.854   |
| SOCDESGEN8 | 0.006    | 0.034 | 0.172                   | 0.863   |
| SOCDESENV4 | 0.027    | 0.031 | 0.862                   | 0.389   |
| COVWORRY2  | 0.003    | 0.033 | 0.097                   | 0.923   |
| OUTDOOR    | -0.016   | 0.029 | -0.541                  | 0.589   |
| CHANGEOP   | -0.117   | 0.034 | -3.398                  | 0.001   |

## INTEROTH ON

|            |        |       |        |       |
|------------|--------|-------|--------|-------|
| MEAS_OTH8  | 0.063  | 0.044 | 1.447  | 0.148 |
| MEAS_SELF4 | -0.040 | 0.045 | -0.898 | 0.369 |
| DISTCOV3   | -0.114 | 0.032 | -3.621 | 0.000 |
| HYPCOVID1  | 0.039  | 0.032 | 1.228  | 0.219 |
| AGE        | -0.004 | 0.035 | -0.115 | 0.909 |
| MALE       | 0.073  | 0.031 | 2.374  | 0.018 |
| CH_FR      | -0.144 | 0.036 | -3.939 | 0.000 |
| CH_ESP     | -0.112 | 0.035 | -3.164 | 0.002 |
| CH_UK      | 0.011  | 0.038 | 0.292  | 0.770 |
| SYMPERS2   | -0.067 | 0.031 | -2.164 | 0.030 |
| SYMPOTHER2 | 0.067  | 0.031 | 2.158  | 0.031 |
| CONSERV6   | 0.072  | 0.038 | 1.887  | 0.059 |
| UNI4       | 0.055  | 0.036 | 1.534  | 0.125 |
| BENEV2     | 0.208  | 0.034 | 6.201  | 0.000 |
| SOCDESGEN8 | 0.034  | 0.034 | 0.989  | 0.323 |
| SOCDESENV4 | -0.032 | 0.032 | -0.990 | 0.322 |
| COVWORRY2  | 0.253  | 0.033 | 7.759  | 0.000 |
| OUTDOOR    | 0.062  | 0.030 | 2.049  | 0.040 |
| CHANGEOP   | 0.063  | 0.033 | 1.887  | 0.059 |

## DISTCLIM ON

|            |        |       |        |       |
|------------|--------|-------|--------|-------|
| MEAS_OTH8  | 0.150  | 0.038 | 3.916  | 0.000 |
| MEAS_SELF4 | -0.087 | 0.039 | -2.223 | 0.026 |
| DISTCOV3   | 0.158  | 0.028 | 5.737  | 0.000 |
| HYPCOVID1  | 0.104  | 0.027 | 3.772  | 0.000 |
| AGE        | -0.055 | 0.031 | -1.779 | 0.075 |
| MALE       | -0.036 | 0.027 | -1.333 | 0.182 |
| CH_FR      | 0.008  | 0.032 | 0.257  | 0.797 |
| CH_ESP     | 0.033  | 0.031 | 1.051  | 0.293 |
| CH_UK      | 0.051  | 0.033 | 1.551  | 0.121 |
| SYMPERS2   | -0.007 | 0.027 | -0.262 | 0.794 |
| SYMPOTHER2 | -0.031 | 0.027 | -1.137 | 0.255 |
| CONSERV6   | -0.093 | 0.033 | -2.780 | 0.005 |
| UNI4       | 0.342  | 0.030 | 11.236 | 0.000 |
| BENEV2     | -0.063 | 0.030 | -2.107 | 0.035 |
| SOCDESGEN8 | -0.157 | 0.030 | -5.256 | 0.000 |
| SOCDESENV4 | 0.071  | 0.028 | 2.533  | 0.011 |
| COVWORRY2  | -0.035 | 0.029 | -1.202 | 0.229 |
| OUTDOOR    | 0.010  | 0.026 | 0.373  | 0.709 |
| CHANGEOP   | 0.331  | 0.029 | 11.529 | 0.000 |

## MEAS\_OTH ON

|          |        |       |        |       |
|----------|--------|-------|--------|-------|
| AGE      | 0.063  | 0.033 | 1.912  | 0.056 |
| MALE     | -0.062 | 0.030 | -2.093 | 0.036 |
| CH_FR    | -0.040 | 0.036 | -1.138 | 0.255 |
| CH_ESP   | -0.076 | 0.034 | -2.221 | 0.026 |
| CH_UK    | 0.000  | 0.036 | -0.009 | 0.993 |
| SYMPERS2 | 0.051  | 0.030 | 1.707  | 0.088 |

|            |        |       |        |       |
|------------|--------|-------|--------|-------|
| SYMPOTHER2 | 0.092  | 0.030 | 3.083  | 0.002 |
| CONSERV6   | 0.385  | 0.032 | 11.854 | 0.000 |
| UNI4       | 0.082  | 0.033 | 2.501  | 0.012 |
| BENEV2     | 0.042  | 0.033 | 1.282  | 0.200 |
| SOCDESGEN8 | -0.075 | 0.032 | -2.388 | 0.017 |
| COVWORRY2  | 0.156  | 0.030 | 5.120  | 0.000 |
| OUTDOOR    | -0.029 | 0.029 | -0.992 | 0.321 |

#### MEAS\_SEL ON

|            |        |       |        |       |
|------------|--------|-------|--------|-------|
| AGE        | 0.212  | 0.032 | 6.721  | 0.000 |
| MALE       | -0.077 | 0.029 | -2.690 | 0.007 |
| CH_FR      | -0.033 | 0.034 | -0.954 | 0.340 |
| CH_ESP     | -0.074 | 0.033 | -2.232 | 0.026 |
| CH_UK      | -0.006 | 0.035 | -0.186 | 0.853 |
| SYMPERS2   | -0.006 | 0.029 | -0.219 | 0.826 |
| SYMPOTHER2 | 0.011  | 0.029 | 0.391  | 0.696 |
| CONSERV6   | 0.403  | 0.031 | 12.950 | 0.000 |
| UNI4       | 0.008  | 0.031 | 0.244  | 0.808 |
| BENEV2     | 0.049  | 0.032 | 1.539  | 0.124 |
| SOCDESGEN8 | 0.001  | 0.030 | 0.026  | 0.979 |
| COVWORRY2  | 0.159  | 0.029 | 5.406  | 0.000 |
| OUTDOOR    | -0.018 | 0.028 | -0.625 | 0.532 |

#### DISTCOV3 ON

|            |        |       |        |       |
|------------|--------|-------|--------|-------|
| AGE        | 0.033  | 0.036 | 0.927  | 0.354 |
| MALE       | 0.006  | 0.032 | 0.175  | 0.861 |
| CH_FR      | 0.073  | 0.038 | 1.911  | 0.056 |
| CH_ESP     | 0.070  | 0.037 | 1.889  | 0.059 |
| CH_UK      | 0.207  | 0.039 | 5.340  | 0.000 |
| SYMPERS2   | 0.064  | 0.032 | 1.987  | 0.047 |
| SYMPOTHER2 | 0.069  | 0.032 | 2.139  | 0.032 |
| CONSERV6   | 0.032  | 0.037 | 0.857  | 0.391 |
| UNI4       | 0.061  | 0.035 | 1.739  | 0.082 |
| BENEV2     | 0.037  | 0.036 | 1.048  | 0.295 |
| SOCDESGEN8 | -0.138 | 0.034 | -4.062 | 0.000 |
| COVWORRY2  | 0.208  | 0.033 | 6.366  | 0.000 |
| OUTDOOR    | 0.037  | 0.032 | 1.153  | 0.249 |

#### HYPCOVID ON

|            |        |       |        |       |
|------------|--------|-------|--------|-------|
| AGE        | -0.070 | 0.036 | -1.925 | 0.054 |
| MALE       | 0.040  | 0.032 | 1.233  | 0.218 |
| CH_FR      | -0.050 | 0.039 | -1.298 | 0.194 |
| CH_ESP     | -0.013 | 0.037 | -0.355 | 0.723 |
| CH_UK      | 0.158  | 0.039 | 4.015  | 0.000 |
| SYMPERS2   | -0.027 | 0.033 | -0.812 | 0.417 |
| SYMPOTHER2 | 0.051  | 0.033 | 1.557  | 0.120 |
| CONSERV6   | 0.145  | 0.037 | 3.916  | 0.000 |
| UNI4       | 0.039  | 0.036 | 1.096  | 0.273 |
| BENEV2     | 0.002  | 0.036 | 0.058  | 0.954 |
| SOCDESGEN8 | 0.034  | 0.035 | 0.997  | 0.319 |

|           |       |       |       |       |
|-----------|-------|-------|-------|-------|
| COVWORRY2 | 0.233 | 0.033 | 7.122 | 0.000 |
| OUTDOOR   | 0.023 | 0.032 | 0.722 | 0.471 |

#### CHANGEOP ON

|            |        |       |        |       |
|------------|--------|-------|--------|-------|
| AGE        | -0.005 | 0.035 | -0.157 | 0.876 |
| MALE       | -0.095 | 0.031 | -3.067 | 0.002 |
| CH_FR      | 0.074  | 0.037 | 1.975  | 0.048 |
| CH_ESP     | 0.079  | 0.036 | 2.190  | 0.029 |
| CH_UK      | -0.049 | 0.038 | -1.295 | 0.195 |
| SYMPERS2   | 0.005  | 0.032 | 0.151  | 0.880 |
| SYMPOTHER2 | -0.068 | 0.031 | -2.165 | 0.030 |
| CONSERV6   | 0.035  | 0.036 | 0.969  | 0.333 |
| UNI4       | 0.351  | 0.033 | 10.700 | 0.000 |
| BENEV2     | -0.077 | 0.035 | -2.202 | 0.028 |
| SOCDEGEN8  | 0.010  | 0.033 | 0.314  | 0.753 |
| COVWORRY2  | 0.122  | 0.032 | 3.799  | 0.000 |
| OUTDOOR    | -0.034 | 0.031 | -1.103 | 0.270 |

#### MEAS\_OTH WITH

|            |       |       |        |       |
|------------|-------|-------|--------|-------|
| MEAS_SELF4 | 0.615 | 0.021 | 29.753 | 0.000 |
|------------|-------|-------|--------|-------|

#### Intercepts

|            |       |       |       |       |
|------------|-------|-------|-------|-------|
| PBCL1      | 3.313 | 0.350 | 9.476 | 0.000 |
| DISTCOV3   | 2.424 | 0.364 | 6.651 | 0.000 |
| HYPCOVID1  | 3.237 | 0.381 | 8.491 | 0.000 |
| DISTCLIM6  | 0.937 | 0.328 | 2.855 | 0.004 |
| MEAS_OTH8  | 2.481 | 0.346 | 7.162 | 0.000 |
| MEAS_SELF4 | 0.511 | 0.316 | 1.619 | 0.106 |
| INTEROTH6  | 1.981 | 0.387 | 5.123 | 0.000 |
| CHANGEOP   | 0.730 | 0.345 | 2.113 | 0.035 |

#### Residual Variances

|            |       |       |        |       |
|------------|-------|-------|--------|-------|
| PBCL1      | 0.719 | 0.025 | 28.610 | 0.000 |
| DISTCOV3   | 0.870 | 0.021 | 41.752 | 0.000 |
| HYPCOVID1  | 0.878 | 0.020 | 42.860 | 0.000 |
| DISTCLIM6  | 0.589 | 0.025 | 23.679 | 0.000 |
| MEAS_OTH8  | 0.742 | 0.025 | 29.622 | 0.000 |
| MEAS_SELF4 | 0.687 | 0.026 | 26.926 | 0.000 |
| INTEROTH6  | 0.779 | 0.024 | 31.983 | 0.000 |
| CHANGEOP   | 0.807 | 0.024 | 34.100 | 0.000 |

#### STANDARDIZED TOTAL, TOTAL INDIRECT, SPECIFIC INDIRECT, AND DIRECT EFFECTS

##### STDYX Standardization

|          |      | Two-Tailed |         |
|----------|------|------------|---------|
| Estimate | S.E. | Est./S.E.  | P-Value |

Effects from MEAS\_OTH to PBCL1



|                |        |       |        |       |
|----------------|--------|-------|--------|-------|
| Total          | -0.118 | 0.043 | -2.705 | 0.007 |
| Total indirect | -0.044 | 0.012 | -3.619 | 0.000 |

Specific indirect 1

|          |        |       |        |       |
|----------|--------|-------|--------|-------|
| PBCL1    |        |       |        |       |
| DISTCLIM |        |       |        |       |
| MEAS_OTH | -0.042 | 0.012 | -3.508 | 0.000 |

Specific indirect 2

|          |        |       |        |       |
|----------|--------|-------|--------|-------|
| PBCL1    |        |       |        |       |
| INTEROTH |        |       |        |       |
| MEAS_OTH | -0.002 | 0.002 | -0.848 | 0.396 |

Direct

|          |        |       |        |       |
|----------|--------|-------|--------|-------|
| PBCL1    |        |       |        |       |
| MEAS_OTH | -0.073 | 0.043 | -1.728 | 0.084 |

Effects from MEAS\_SEL to PBCL1

|                |       |       |       |       |
|----------------|-------|-------|-------|-------|
| Total          | 0.048 | 0.045 | 1.072 | 0.284 |
| Total indirect | 0.026 | 0.012 | 2.223 | 0.026 |

Specific indirect 1

|          |       |       |       |       |
|----------|-------|-------|-------|-------|
| PBCL1    |       |       |       |       |
| DISTCLIM |       |       |       |       |
| MEAS_SEL | 0.024 | 0.011 | 2.135 | 0.033 |

Specific indirect 2

|          |       |       |       |       |
|----------|-------|-------|-------|-------|
| PBCL1    |       |       |       |       |
| INTEROTH |       |       |       |       |
| MEAS_SEL | 0.001 | 0.002 | 0.681 | 0.496 |

Direct

|          |       |       |       |       |
|----------|-------|-------|-------|-------|
| PBCL1    |       |       |       |       |
| MEAS_SEL | 0.022 | 0.043 | 0.510 | 0.610 |

Effects from DISTCOV3 to PBCL1

|                |        |       |        |       |
|----------------|--------|-------|--------|-------|
| Total          | -0.036 | 0.031 | -1.155 | 0.248 |
| Total indirect | -0.040 | 0.010 | -3.878 | 0.000 |

Specific indirect 1

|          |        |       |        |       |
|----------|--------|-------|--------|-------|
| PBCL1    |        |       |        |       |
| DISTCLIM |        |       |        |       |
| DISTCOV3 | -0.044 | 0.010 | -4.603 | 0.000 |

Specific indirect 2

|       |  |
|-------|--|
| PBCL1 |  |
|-------|--|

|          |       |       |       |       |
|----------|-------|-------|-------|-------|
| INTEROTH |       |       |       |       |
| DISTCOV3 | 0.004 | 0.004 | 1.005 | 0.315 |

Direct

|          |       |       |       |       |
|----------|-------|-------|-------|-------|
| PBCL1    |       |       |       |       |
| DISTCOV3 | 0.004 | 0.031 | 0.131 | 0.896 |

Effects from HYPCOVID to PBCL1

|                |        |       |        |       |
|----------------|--------|-------|--------|-------|
| Total          | 0.023  | 0.031 | 0.718  | 0.473 |
| Total indirect | -0.030 | 0.009 | -3.488 | 0.000 |

Specific indirect 1

|          |        |       |        |       |
|----------|--------|-------|--------|-------|
| PBCL1    |        |       |        |       |
| DISTCLIM |        |       |        |       |
| HYPCOVID | -0.029 | 0.009 | -3.389 | 0.001 |

Specific indirect 2

|          |        |       |        |       |
|----------|--------|-------|--------|-------|
| PBCL1    |        |       |        |       |
| INTEROTH |        |       |        |       |
| HYPCOVID | -0.001 | 0.002 | -0.796 | 0.426 |

Direct

|          |       |       |       |       |
|----------|-------|-------|-------|-------|
| PBCL1    |       |       |       |       |
| HYPCOVID | 0.053 | 0.031 | 1.728 | 0.084 |

## CONFIDENCE INTERVALS OF STANDARDIZED MODEL RESULTS

STDYX Standardization

|  | Lower .5% | Lower 2.5% | Lower 5% | Estimate | Upper 5% | Upper 2.5% | Upper .5% |
|--|-----------|------------|----------|----------|----------|------------|-----------|
|--|-----------|------------|----------|----------|----------|------------|-----------|

PBCL1 ON

|            |        |        |        |        |        |        |        |
|------------|--------|--------|--------|--------|--------|--------|--------|
| INTEROTH6  | -0.116 | -0.096 | -0.086 | -0.033 | 0.019  | 0.029  | 0.049  |
| DISTCLIM6  | -0.373 | -0.351 | -0.340 | -0.280 | -0.221 | -0.210 | -0.188 |
| MEAS_OTH8  | -0.183 | -0.157 | -0.143 | -0.073 | -0.004 | 0.010  | 0.036  |
| MEAS_SELF4 | -0.090 | -0.063 | -0.049 | 0.022  | 0.093  | 0.107  | 0.134  |
| DISTCOV3   | -0.077 | -0.057 | -0.047 | 0.004  | 0.056  | 0.065  | 0.085  |
| HYPCOVID1  | -0.026 | -0.007 | 0.003  | 0.053  | 0.103  | 0.113  | 0.132  |
| AGE        | -0.074 | -0.053 | -0.043 | 0.013  | 0.069  | 0.080  | 0.101  |
| MALE       | -0.072 | -0.053 | -0.044 | 0.005  | 0.054  | 0.063  | 0.082  |
| CH_FR      | -0.019 | 0.003  | 0.014  | 0.073  | 0.131  | 0.142  | 0.164  |
| CH_ESP     | 0.029  | 0.050  | 0.060  | 0.117  | 0.173  | 0.184  | 0.205  |
| CH_UK      | 0.077  | 0.100  | 0.111  | 0.171  | 0.231  | 0.243  | 0.265  |
| SYMPERS2   | -0.095 | -0.077 | -0.068 | -0.019 | 0.030  | 0.040  | 0.058  |
| SYMPOTHER2 | -0.075 | -0.057 | -0.047 | 0.002  | 0.052  | 0.061  | 0.080  |

|            |        |        |        |        |        |        |        |
|------------|--------|--------|--------|--------|--------|--------|--------|
| CONSERV6   | -0.006 | 0.017  | 0.029  | 0.090  | 0.151  | 0.163  | 0.185  |
| UNI4       | -0.316 | -0.293 | -0.282 | -0.222 | -0.162 | -0.151 | -0.128 |
| BENEV2     | -0.080 | -0.060 | -0.049 | 0.006  | 0.061  | 0.072  | 0.093  |
| SOCDESGEN8 | -0.081 | -0.060 | -0.049 | 0.006  | 0.061  | 0.072  | 0.092  |
| SOCDESENV4 | -0.053 | -0.034 | -0.024 | 0.027  | 0.078  | 0.088  | 0.107  |
| COVWORRY2  | -0.082 | -0.062 | -0.051 | 0.003  | 0.058  | 0.068  | 0.089  |
| OUTDOOR    | -0.090 | -0.073 | -0.063 | -0.016 | 0.032  | 0.041  | 0.059  |
| CHANGEOP   | -0.205 | -0.184 | -0.173 | -0.117 | -0.060 | -0.049 | -0.028 |

#### INTEROTH ON

|            |        |        |        |        |        |        |        |
|------------|--------|--------|--------|--------|--------|--------|--------|
| MEAS_OTH8  | -0.049 | -0.022 | -0.009 | 0.063  | 0.135  | 0.149  | 0.176  |
| MEAS_SELF4 | -0.156 | -0.128 | -0.114 | -0.040 | 0.034  | 0.048  | 0.075  |
| DISTCOV3   | -0.196 | -0.176 | -0.166 | -0.114 | -0.062 | -0.052 | -0.033 |
| HYPCOVID1  | -0.042 | -0.023 | -0.013 | 0.039  | 0.091  | 0.100  | 0.120  |
| AGE        | -0.095 | -0.073 | -0.062 | -0.004 | 0.054  | 0.065  | 0.087  |
| MALE       | -0.006 | 0.013  | 0.022  | 0.073  | 0.124  | 0.133  | 0.152  |
| CH_FR      | -0.238 | -0.215 | -0.204 | -0.144 | -0.084 | -0.072 | -0.050 |
| CH_ESP     | -0.204 | -0.182 | -0.171 | -0.112 | -0.054 | -0.043 | -0.021 |
| CH_UK      | -0.087 | -0.064 | -0.052 | 0.011  | 0.074  | 0.086  | 0.109  |
| SYMPERS2   | -0.146 | -0.127 | -0.118 | -0.067 | -0.016 | -0.006 | 0.013  |
| SYMPOTHER2 | -0.013 | 0.006  | 0.016  | 0.067  | 0.119  | 0.128  | 0.148  |
| CONSERV6   | -0.026 | -0.003 | 0.009  | 0.072  | 0.135  | 0.147  | 0.171  |
| UNI4       | -0.037 | -0.015 | -0.004 | 0.055  | 0.114  | 0.126  | 0.148  |
| BENEV2     | 0.122  | 0.143  | 0.153  | 0.208  | 0.264  | 0.274  | 0.295  |
| SOCDESGEN8 | -0.054 | -0.033 | -0.023 | 0.034  | 0.090  | 0.101  | 0.122  |
| SOCDESENV4 | -0.115 | -0.095 | -0.085 | -0.032 | 0.021  | 0.031  | 0.051  |
| COVWORRY2  | 0.169  | 0.189  | 0.200  | 0.253  | 0.307  | 0.317  | 0.338  |
| OUTDOOR    | -0.016 | 0.003  | 0.012  | 0.062  | 0.111  | 0.121  | 0.139  |
| CHANGEOP   | -0.023 | -0.002 | 0.008  | 0.063  | 0.118  | 0.129  | 0.149  |

#### DISTCLIM ON

|            |        |        |        |        |        |        |        |
|------------|--------|--------|--------|--------|--------|--------|--------|
| MEAS_OTH8  | 0.051  | 0.075  | 0.087  | 0.150  | 0.213  | 0.225  | 0.248  |
| MEAS_SELF4 | -0.188 | -0.164 | -0.151 | -0.087 | -0.023 | -0.010 | 0.014  |
| DISTCOV3   | 0.087  | 0.104  | 0.113  | 0.158  | 0.203  | 0.212  | 0.229  |
| HYPCOVID1  | 0.033  | 0.050  | 0.058  | 0.104  | 0.149  | 0.158  | 0.175  |
| AGE        | -0.134 | -0.115 | -0.105 | -0.055 | -0.004 | 0.006  | 0.024  |
| MALE       | -0.105 | -0.088 | -0.080 | -0.036 | 0.008  | 0.017  | 0.033  |
| CH_FR      | -0.074 | -0.054 | -0.044 | 0.008  | 0.061  | 0.071  | 0.090  |
| CH_ESP     | -0.047 | -0.028 | -0.018 | 0.033  | 0.084  | 0.093  | 0.112  |
| CH_UK      | -0.034 | -0.014 | -0.003 | 0.051  | 0.106  | 0.116  | 0.137  |
| SYMPERS2   | -0.077 | -0.060 | -0.051 | -0.007 | 0.037  | 0.046  | 0.062  |
| SYMPOTHER2 | -0.101 | -0.084 | -0.076 | -0.031 | 0.014  | 0.022  | 0.039  |
| CONSERV6   | -0.179 | -0.159 | -0.148 | -0.093 | -0.038 | -0.027 | -0.007 |
| UNI4       | 0.263  | 0.282  | 0.292  | 0.342  | 0.392  | 0.401  | 0.420  |
| BENEV2     | -0.139 | -0.121 | -0.111 | -0.063 | -0.014 | -0.004 | 0.014  |
| SOCDESGEN8 | -0.233 | -0.215 | -0.206 | -0.157 | -0.108 | -0.098 | -0.080 |
| SOCDESENV4 | -0.001 | 0.016  | 0.025  | 0.071  | 0.117  | 0.126  | 0.144  |
| COVWORRY2  | -0.110 | -0.092 | -0.083 | -0.035 | 0.013  | 0.022  | 0.040  |
| OUTDOOR    | -0.058 | -0.042 | -0.033 | 0.010  | 0.053  | 0.061  | 0.077  |
| CHANGEOP   | 0.257  | 0.275  | 0.284  | 0.331  | 0.379  | 0.388  | 0.405  |

#### MEAS\_OTH ON

|            |        |        |        |        |        |        |       |
|------------|--------|--------|--------|--------|--------|--------|-------|
| AGE        | -0.022 | -0.002 | 0.009  | 0.063  | 0.118  | 0.128  | 0.149 |
| MALE       | -0.139 | -0.120 | -0.111 | -0.062 | -0.013 | -0.004 | 0.014 |
| CH_FR      | -0.132 | -0.110 | -0.099 | -0.040 | 0.018  | 0.029  | 0.051 |
| CH_ESP     | -0.165 | -0.144 | -0.133 | -0.076 | -0.020 | -0.009 | 0.012 |
| CH_UK      | -0.094 | -0.071 | -0.060 | 0.000  | 0.059  | 0.071  | 0.093 |
| SYMPERS2   | -0.026 | -0.008 | 0.002  | 0.051  | 0.101  | 0.110  | 0.128 |
| SYMPOTHER2 | 0.015  | 0.034  | 0.043  | 0.092  | 0.141  | 0.151  | 0.169 |
| CONSERV6   | 0.301  | 0.321  | 0.332  | 0.385  | 0.439  | 0.449  | 0.469 |
| UNI4       | -0.002 | 0.018  | 0.028  | 0.082  | 0.135  | 0.146  | 0.166 |
| BENEV2     | -0.043 | -0.022 | -0.012 | 0.042  | 0.097  | 0.107  | 0.127 |
| SOCDEGEN8  | -0.157 | -0.137 | -0.127 | -0.075 | -0.023 | -0.014 | 0.006 |
| COVWORRY2  | 0.078  | 0.096  | 0.106  | 0.156  | 0.206  | 0.216  | 0.235 |
| OUTDOOR    | -0.105 | -0.087 | -0.077 | -0.029 | 0.019  | 0.028  | 0.046 |

#### MEAS\_SEL ON

|            |        |        |        |        |        |        |        |
|------------|--------|--------|--------|--------|--------|--------|--------|
| AGE        | 0.131  | 0.150  | 0.160  | 0.212  | 0.264  | 0.274  | 0.294  |
| MALE       | -0.151 | -0.133 | -0.124 | -0.077 | -0.030 | -0.021 | -0.003 |
| CH_FR      | -0.121 | -0.100 | -0.089 | -0.033 | 0.024  | 0.034  | 0.055  |
| CH_ESP     | -0.159 | -0.139 | -0.128 | -0.074 | -0.019 | -0.009 | 0.011  |
| CH_UK      | -0.096 | -0.075 | -0.064 | -0.006 | 0.051  | 0.062  | 0.083  |
| SYMPERS2   | -0.081 | -0.063 | -0.054 | -0.006 | 0.041  | 0.050  | 0.068  |
| SYMPOTHER2 | -0.063 | -0.045 | -0.036 | 0.011  | 0.059  | 0.068  | 0.086  |
| CONSERV6   | 0.323  | 0.342  | 0.352  | 0.403  | 0.454  | 0.464  | 0.483  |
| UNI4       | -0.073 | -0.054 | -0.044 | 0.008  | 0.059  | 0.069  | 0.089  |
| BENEV2     | -0.033 | -0.013 | -0.003 | 0.049  | 0.101  | 0.111  | 0.131  |
| SOCDEGEN8  | -0.078 | -0.059 | -0.049 | 0.001  | 0.051  | 0.060  | 0.079  |
| COVWORRY2  | 0.083  | 0.101  | 0.111  | 0.159  | 0.207  | 0.216  | 0.235  |
| OUTDOOR    | -0.090 | -0.073 | -0.064 | -0.018 | 0.029  | 0.038  | 0.055  |

#### DISTCOV3 ON

|            |        |        |        |        |        |        |        |
|------------|--------|--------|--------|--------|--------|--------|--------|
| AGE        | -0.059 | -0.037 | -0.026 | 0.033  | 0.092  | 0.104  | 0.126  |
| MALE       | -0.077 | -0.058 | -0.047 | 0.006  | 0.059  | 0.069  | 0.089  |
| CH_FR      | -0.026 | -0.002 | 0.010  | 0.073  | 0.137  | 0.149  | 0.172  |
| CH_ESP     | -0.026 | -0.003 | 0.009  | 0.070  | 0.131  | 0.143  | 0.166  |
| CH_UK      | 0.107  | 0.131  | 0.143  | 0.207  | 0.271  | 0.283  | 0.307  |
| SYMPERS2   | -0.019 | 0.001  | 0.011  | 0.064  | 0.118  | 0.128  | 0.148  |
| SYMPOTHER2 | -0.014 | 0.006  | 0.016  | 0.069  | 0.123  | 0.133  | 0.153  |
| CONSERV6   | -0.063 | -0.041 | -0.029 | 0.032  | 0.092  | 0.104  | 0.127  |
| UNI4       | -0.030 | -0.008 | 0.003  | 0.061  | 0.120  | 0.131  | 0.153  |
| BENEV2     | -0.055 | -0.033 | -0.021 | 0.037  | 0.096  | 0.108  | 0.130  |
| SOCDEGEN8  | -0.226 | -0.205 | -0.194 | -0.138 | -0.082 | -0.072 | -0.051 |
| COVWORRY2  | 0.124  | 0.144  | 0.154  | 0.208  | 0.262  | 0.272  | 0.293  |
| OUTDOOR    | -0.045 | -0.026 | -0.016 | 0.037  | 0.089  | 0.099  | 0.118  |

#### HYPCOVID ON

|       |        |        |        |        |        |       |       |
|-------|--------|--------|--------|--------|--------|-------|-------|
| AGE   | -0.164 | -0.141 | -0.130 | -0.070 | -0.010 | 0.001 | 0.024 |
| MALE  | -0.044 | -0.024 | -0.013 | 0.040  | 0.093  | 0.104 | 0.124 |
| CH_FR | -0.150 | -0.127 | -0.114 | -0.050 | 0.013  | 0.026 | 0.050 |

|            |        |        |        |        |       |       |       |
|------------|--------|--------|--------|--------|-------|-------|-------|
| CH_ESP     | -0.110 | -0.087 | -0.075 | -0.013 | 0.048 | 0.060 | 0.083 |
| CH_UK      | 0.057  | 0.081  | 0.093  | 0.158  | 0.223 | 0.235 | 0.259 |
| SYMPERS2   | -0.111 | -0.091 | -0.080 | -0.027 | 0.027 | 0.037 | 0.058 |
| SYMPOTHER2 | -0.033 | -0.013 | -0.003 | 0.051  | 0.105 | 0.115 | 0.135 |
| CONSERV6   | 0.050  | 0.072  | 0.084  | 0.145  | 0.206 | 0.217 | 0.240 |
| UNI4       | -0.053 | -0.031 | -0.020 | 0.039  | 0.098 | 0.109 | 0.131 |
| BENEV2     | -0.091 | -0.069 | -0.058 | 0.002  | 0.062 | 0.073 | 0.096 |
| SOCDEGEN8  | -0.055 | -0.033 | -0.022 | 0.034  | 0.091 | 0.102 | 0.124 |
| COVWORRY2  | 0.149  | 0.169  | 0.179  | 0.233  | 0.287 | 0.297 | 0.317 |
| OUTDOOR    | -0.059 | -0.040 | -0.030 | 0.023  | 0.076 | 0.086 | 0.106 |

#### CHANGEOP ON

|            |        |        |        |        |        |        |        |
|------------|--------|--------|--------|--------|--------|--------|--------|
| AGE        | -0.095 | -0.074 | -0.063 | -0.005 | 0.052  | 0.063  | 0.084  |
| MALE       | -0.176 | -0.157 | -0.147 | -0.095 | -0.044 | -0.034 | -0.015 |
| CH_FR      | -0.022 | 0.001  | 0.012  | 0.074  | 0.135  | 0.147  | 0.170  |
| CH_ESP     | -0.014 | 0.008  | 0.020  | 0.079  | 0.138  | 0.150  | 0.172  |
| CH_UK      | -0.147 | -0.124 | -0.112 | -0.049 | 0.013  | 0.025  | 0.049  |
| SYMPERS2   | -0.077 | -0.057 | -0.047 | 0.005  | 0.057  | 0.067  | 0.087  |
| SYMPOTHER2 | -0.149 | -0.130 | -0.120 | -0.068 | -0.016 | -0.006 | 0.013  |
| CONSERV6   | -0.058 | -0.036 | -0.024 | 0.035  | 0.094  | 0.105  | 0.127  |
| UNI4       | 0.266  | 0.286  | 0.297  | 0.351  | 0.404  | 0.415  | 0.435  |
| BENEV2     | -0.167 | -0.145 | -0.134 | -0.077 | -0.019 | -0.008 | 0.013  |
| SOCDEGEN8  | -0.075 | -0.055 | -0.044 | 0.010  | 0.065  | 0.075  | 0.096  |
| COVWORRY2  | 0.039  | 0.059  | 0.069  | 0.122  | 0.174  | 0.184  | 0.204  |
| OUTDOOR    | -0.113 | -0.094 | -0.084 | -0.034 | 0.017  | 0.026  | 0.045  |

#### MEAS\_OTH WITH

|            |       |       |       |       |       |       |       |
|------------|-------|-------|-------|-------|-------|-------|-------|
| MEAS_SELF4 | 0.562 | 0.574 | 0.581 | 0.615 | 0.649 | 0.655 | 0.668 |
|------------|-------|-------|-------|-------|-------|-------|-------|

#### Intercepts

|          |        |        |        |       |       |       |       |
|----------|--------|--------|--------|-------|-------|-------|-------|
| PBCL1    | 2.412  | 2.628  | 2.738  | 3.313 | 3.888 | 3.998 | 4.213 |
| DISTCOV3 | 1.485  | 1.709  | 1.824  | 2.424 | 3.023 | 3.138 | 3.362 |
| HYPCOVID | 2.255  | 2.489  | 2.610  | 3.237 | 3.864 | 3.984 | 4.218 |
| DISTCLIM | 0.092  | 0.294  | 0.397  | 0.937 | 1.477 | 1.580 | 1.783 |
| MEAS_OTH | 1.589  | 1.802  | 1.911  | 2.481 | 3.051 | 3.160 | 3.374 |
| MEAS_SEL | -0.302 | -0.108 | -0.008 | 0.511 | 1.031 | 1.131 | 1.325 |
| INTEROTH | 0.985  | 1.223  | 1.345  | 1.981 | 2.617 | 2.739 | 2.977 |
| CHANGEOP | -0.160 | 0.053  | 0.162  | 0.730 | 1.298 | 1.406 | 1.619 |

#### Residual Variances

|          |       |       |       |       |       |       |       |
|----------|-------|-------|-------|-------|-------|-------|-------|
| PBCL1    | 0.655 | 0.670 | 0.678 | 0.719 | 0.761 | 0.769 | 0.784 |
| DISTCOV3 | 0.816 | 0.829 | 0.836 | 0.870 | 0.904 | 0.911 | 0.924 |
| HYPCOVID | 0.825 | 0.838 | 0.844 | 0.878 | 0.912 | 0.918 | 0.931 |
| DISTCLIM | 0.525 | 0.540 | 0.548 | 0.589 | 0.630 | 0.638 | 0.653 |
| MEAS_OTH | 0.677 | 0.693 | 0.700 | 0.742 | 0.783 | 0.791 | 0.806 |
| MEAS_SEL | 0.622 | 0.637 | 0.645 | 0.687 | 0.729 | 0.737 | 0.753 |
| INTEROTH | 0.716 | 0.731 | 0.739 | 0.779 | 0.819 | 0.826 | 0.841 |
| CHANGEOP | 0.746 | 0.761 | 0.768 | 0.807 | 0.846 | 0.853 | 0.868 |

CONFIDENCE INTERVALS OF STANDARDIZED TOTAL, TOTAL INDIRECT,  
SPECIFIC INDIRECT, AND DIRECT EFFECTS  
STDYX Standardization

|  | Lower .5% | Lower 2.5% | Lower 5% | Estimate | Upper 5% | Upper 2.5% | Upper .5% |
|--|-----------|------------|----------|----------|----------|------------|-----------|
|--|-----------|------------|----------|----------|----------|------------|-----------|

Effects from MEAS\_OTH to PBCL1

|                |        |        |        |        |        |        |        |
|----------------|--------|--------|--------|--------|--------|--------|--------|
| Total          | -0.230 | -0.203 | -0.189 | -0.118 | -0.046 | -0.032 | -0.006 |
| Total indirect | -0.076 | -0.068 | -0.064 | -0.044 | -0.024 | -0.020 | -0.013 |

Specific indirect 1

PBCL1

DISTCLIM

|          |        |        |        |        |        |        |        |
|----------|--------|--------|--------|--------|--------|--------|--------|
| MEAS_OTH | -0.073 | -0.065 | -0.062 | -0.042 | -0.022 | -0.019 | -0.011 |
|----------|--------|--------|--------|--------|--------|--------|--------|

Specific indirect 2

PBCL1

INTEROTH

|          |        |        |        |        |       |       |       |
|----------|--------|--------|--------|--------|-------|-------|-------|
| MEAS_OTH | -0.009 | -0.007 | -0.006 | -0.002 | 0.002 | 0.003 | 0.004 |
|----------|--------|--------|--------|--------|-------|-------|-------|

Direct

PBCL1

|          |        |        |        |        |        |       |       |
|----------|--------|--------|--------|--------|--------|-------|-------|
| MEAS_OTH | -0.183 | -0.157 | -0.143 | -0.073 | -0.004 | 0.010 | 0.036 |
|----------|--------|--------|--------|--------|--------|-------|-------|

Effects from MEAS\_SEL to PBCL1

|                |        |        |        |       |       |       |       |
|----------------|--------|--------|--------|-------|-------|-------|-------|
| Total          | -0.067 | -0.040 | -0.026 | 0.048 | 0.121 | 0.135 | 0.163 |
| Total indirect | -0.004 | 0.003  | 0.007  | 0.026 | 0.045 | 0.048 | 0.056 |

Specific indirect 1

PBCL1

DISTCLIM

|          |        |       |       |       |       |       |       |
|----------|--------|-------|-------|-------|-------|-------|-------|
| MEAS_SEL | -0.005 | 0.002 | 0.006 | 0.024 | 0.043 | 0.047 | 0.054 |
|----------|--------|-------|-------|-------|-------|-------|-------|

Specific indirect 2

PBCL1

INTEROTH

|          |        |        |        |       |       |       |       |
|----------|--------|--------|--------|-------|-------|-------|-------|
| MEAS_SEL | -0.004 | -0.003 | -0.002 | 0.001 | 0.005 | 0.005 | 0.006 |
|----------|--------|--------|--------|-------|-------|-------|-------|

Direct

PBCL1

|          |        |        |        |       |       |       |       |
|----------|--------|--------|--------|-------|-------|-------|-------|
| MEAS_SEL | -0.090 | -0.063 | -0.049 | 0.022 | 0.093 | 0.107 | 0.134 |
|----------|--------|--------|--------|-------|-------|-------|-------|

Effects from DISTCOV3 to PBCL1

|       |        |        |        |        |       |       |       |
|-------|--------|--------|--------|--------|-------|-------|-------|
| Total | -0.117 | -0.098 | -0.088 | -0.036 | 0.015 | 0.025 | 0.045 |
|-------|--------|--------|--------|--------|-------|-------|-------|

|                     |        |        |        |        |        |        |        |
|---------------------|--------|--------|--------|--------|--------|--------|--------|
| Total indirect      | -0.067 | -0.061 | -0.058 | -0.040 | -0.023 | -0.020 | -0.014 |
| Specific indirect 1 |        |        |        |        |        |        |        |
| PBCL1               |        |        |        |        |        |        |        |
| DISTCLIM            |        |        |        |        |        |        |        |
| DISTCOV3            | -0.069 | -0.063 | -0.060 | -0.044 | -0.028 | -0.025 | -0.020 |
| Specific indirect 2 |        |        |        |        |        |        |        |
| PBCL1               |        |        |        |        |        |        |        |
| INTEROTH            |        |        |        |        |        |        |        |
| DISTCOV3            | -0.006 | -0.004 | -0.002 | 0.004  | 0.010  | 0.011  | 0.014  |
| Direct              |        |        |        |        |        |        |        |
| PBCL1               |        |        |        |        |        |        |        |
| DISTCOV3            | -0.077 | -0.057 | -0.047 | 0.004  | 0.056  | 0.065  | 0.085  |

#### Effects from HYPCOVID to PBCL1

|                     |        |        |        |        |        |        |        |
|---------------------|--------|--------|--------|--------|--------|--------|--------|
| Total               | -0.058 | -0.039 | -0.029 | 0.023  | 0.074  | 0.084  | 0.103  |
| Total indirect      | -0.053 | -0.047 | -0.045 | -0.030 | -0.016 | -0.013 | -0.008 |
| Specific indirect 1 |        |        |        |        |        |        |        |
| PBCL1               |        |        |        |        |        |        |        |
| DISTCLIM            |        |        |        |        |        |        |        |
| HYPCOVID            | -0.051 | -0.046 | -0.043 | -0.029 | -0.015 | -0.012 | -0.007 |
| Specific indirect 2 |        |        |        |        |        |        |        |
| PBCL1               |        |        |        |        |        |        |        |
| INTEROTH            |        |        |        |        |        |        |        |
| HYPCOVID            | -0.005 | -0.004 | -0.004 | -0.001 | 0.001  | 0.002  | 0.003  |
| Direct              |        |        |        |        |        |        |        |
| PBCL1               |        |        |        |        |        |        |        |
| HYPCOVID            | -0.026 | -0.007 | 0.003  | 0.053  | 0.103  | 0.113  | 0.132  |

#### Predicting Class 5: the well-meaning

THE MODEL ESTIMATION TERMINATED NORMALLY

#### MODEL FIT INFORMATION

Number of Free Parameters 141

Loglikelihood

H0 Value -8623.670

|          |           |
|----------|-----------|
| H1 Value | -8589.691 |
|----------|-----------|

#### Information Criteria

|                          |           |
|--------------------------|-----------|
| Akaike (AIC)             | 17529.339 |
| Bayesian (BIC)           | 18207.569 |
| Sample-Size Adjusted BIC | 17759.774 |
| (n* = (n + 2) / 24)      |           |

#### Chi-Square Test of Model Fit

|                    |        |
|--------------------|--------|
| Value              | 67.957 |
| Degrees of Freedom | 15     |
| P-Value            | 0.0000 |

#### RMSEA (Root Mean Square Error Of Approximation)

|                          |             |
|--------------------------|-------------|
| Estimate                 | 0.062       |
| 90 Percent C.I.          | 0.048 0.078 |
| Probability RMSEA <= .05 | 0.080       |

#### CFI/TLI

|     |       |
|-----|-------|
| CFI | 0.976 |
| TLI | 0.776 |

#### Chi-Square Test of Model Fit for the Baseline Model

|                    |          |
|--------------------|----------|
| Value              | 2344.411 |
| Degrees of Freedom | 140      |
| P-Value            | 0.0000   |

#### SRMR (Standardized Root Mean Square Residual)

|       |       |
|-------|-------|
| Value | 0.023 |
|-------|-------|

#### STANDARDIZED MODEL RESULTS

#### STDYX Standardization

|            |          |       | Two-Tailed |         |
|------------|----------|-------|------------|---------|
|            | Estimate | S.E.  | Est./S.E.  | P-Value |
| PBCL5 ON   |          |       |            |         |
| INTEROTH6  | 0.101    | 0.036 | 2.822      | 0.005   |
| DISTCLIM6  | 0.003    | 0.042 | 0.080      | 0.936   |
| MEAS_OTH8  | -0.005   | 0.048 | -0.105     | 0.916   |
| MEAS_SELF4 | -0.058   | 0.049 | -1.190     | 0.234   |
| DISTCOV3   | 0.027    | 0.035 | 0.752      | 0.452   |



|            |        |       |        |       |
|------------|--------|-------|--------|-------|
| HYPCOVID1  | -0.062 | 0.035 | -1.778 | 0.075 |
| AGE        | 0.013  | 0.038 | 0.341  | 0.733 |
| MALE       | 0.015  | 0.034 | 0.432  | 0.666 |
| CH_FR      | -0.104 | 0.040 | -2.588 | 0.010 |
| CH_ESP     | 0.037  | 0.039 | 0.960  | 0.337 |
| CH_UK      | 0.066  | 0.041 | 1.593  | 0.111 |
| SYMPERS2   | 0.002  | 0.034 | 0.074  | 0.941 |
| SYMPOTHER2 | -0.004 | 0.034 | -0.107 | 0.915 |
| CONSERV6   | -0.037 | 0.042 | -0.885 | 0.376 |
| UNI4       | 0.122  | 0.041 | 2.938  | 0.003 |
| BENEV2     | -0.020 | 0.038 | -0.530 | 0.596 |
| SOCDESGEN8 | 0.009  | 0.038 | 0.240  | 0.810 |
| SOCDESENV4 | -0.156 | 0.035 | -4.482 | 0.000 |
| COVWORRY2  | 0.020  | 0.037 | 0.545  | 0.586 |
| OUTDOOR    | 0.009  | 0.033 | 0.260  | 0.795 |
| CHANGEOP   | 0.062  | 0.039 | 1.607  | 0.108 |

#### INTEROTH ON

|            |        |       |        |       |
|------------|--------|-------|--------|-------|
| MEAS_OTH8  | 0.063  | 0.044 | 1.445  | 0.148 |
| MEAS_SELF4 | -0.040 | 0.045 | -0.896 | 0.370 |
| DISTCOV3   | -0.114 | 0.032 | -3.621 | 0.000 |
| HYPCOVID1  | 0.039  | 0.032 | 1.230  | 0.219 |
| AGE        | -0.004 | 0.035 | -0.116 | 0.908 |
| MALE       | 0.073  | 0.031 | 2.374  | 0.018 |
| CH_FR      | -0.144 | 0.036 | -3.936 | 0.000 |
| CH_ESP     | -0.112 | 0.035 | -3.163 | 0.002 |
| CH_UK      | 0.011  | 0.038 | 0.292  | 0.770 |
| SYMPERS2   | -0.067 | 0.031 | -2.163 | 0.031 |
| SYMPOTHER2 | 0.067  | 0.031 | 2.159  | 0.031 |
| CONSERV6   | 0.072  | 0.038 | 1.886  | 0.059 |
| UNI4       | 0.055  | 0.036 | 1.537  | 0.124 |
| BENEV2     | 0.208  | 0.034 | 6.200  | 0.000 |
| SOCDESGEN8 | 0.034  | 0.034 | 0.989  | 0.323 |
| SOCDESENV4 | -0.032 | 0.032 | -0.989 | 0.323 |
| COVWORRY2  | 0.253  | 0.033 | 7.759  | 0.000 |
| OUTDOOR    | 0.062  | 0.030 | 2.050  | 0.040 |
| CHANGEOP   | 0.063  | 0.033 | 1.883  | 0.060 |

#### DISTCLIM ON

|            |        |       |        |       |
|------------|--------|-------|--------|-------|
| MEAS_OTH8  | 0.149  | 0.038 | 3.906  | 0.000 |
| MEAS_SELF4 | -0.087 | 0.039 | -2.218 | 0.027 |
| DISTCOV3   | 0.158  | 0.028 | 5.742  | 0.000 |
| HYPCOVID1  | 0.104  | 0.027 | 3.774  | 0.000 |
| AGE        | -0.055 | 0.031 | -1.785 | 0.074 |
| MALE       | -0.036 | 0.027 | -1.330 | 0.183 |
| CH_FR      | 0.008  | 0.032 | 0.263  | 0.793 |
| CH_ESP     | 0.033  | 0.031 | 1.054  | 0.292 |
| CH_UK      | 0.052  | 0.033 | 1.557  | 0.119 |
| SYMPERS2   | -0.007 | 0.027 | -0.255 | 0.799 |
| SYMPOTHER2 | -0.031 | 0.027 | -1.132 | 0.258 |

|            |        |       |        |       |
|------------|--------|-------|--------|-------|
| CONSERV6   | -0.093 | 0.033 | -2.783 | 0.005 |
| UNI4       | 0.342  | 0.030 | 11.243 | 0.000 |
| BENEV2     | -0.063 | 0.030 | -2.109 | 0.035 |
| SOCDESGEN8 | -0.156 | 0.030 | -5.257 | 0.000 |
| SOCDESENV4 | 0.071  | 0.028 | 2.535  | 0.011 |
| COVWORRY2  | -0.035 | 0.029 | -1.207 | 0.227 |
| OUTDOOR    | 0.010  | 0.026 | 0.378  | 0.705 |
| CHANGEOP   | 0.332  | 0.029 | 11.576 | 0.000 |

#### MEAS\_OTH ON

|            |        |       |        |       |
|------------|--------|-------|--------|-------|
| AGE        | 0.063  | 0.033 | 1.913  | 0.056 |
| MALE       | -0.062 | 0.030 | -2.095 | 0.036 |
| CH_FR      | -0.040 | 0.036 | -1.138 | 0.255 |
| CH_ESP     | -0.076 | 0.034 | -2.221 | 0.026 |
| CH_UK      | 0.000  | 0.036 | -0.006 | 0.995 |
| SYMPERS2   | 0.051  | 0.030 | 1.707  | 0.088 |
| SYMPOTHER2 | 0.092  | 0.030 | 3.081  | 0.002 |
| CONSERV6   | 0.385  | 0.032 | 11.856 | 0.000 |
| UNI4       | 0.082  | 0.033 | 2.496  | 0.013 |
| BENEV2     | 0.042  | 0.033 | 1.285  | 0.199 |
| SOCDESGEN8 | -0.075 | 0.032 | -2.389 | 0.017 |
| COVWORRY2  | 0.156  | 0.030 | 5.119  | 0.000 |
| OUTDOOR    | -0.029 | 0.029 | -0.992 | 0.321 |

#### MEAS\_SEL ON

|            |        |       |        |       |
|------------|--------|-------|--------|-------|
| AGE        | 0.212  | 0.032 | 6.721  | 0.000 |
| MALE       | -0.077 | 0.029 | -2.690 | 0.007 |
| CH_FR      | -0.033 | 0.034 | -0.954 | 0.340 |
| CH_ESP     | -0.074 | 0.033 | -2.232 | 0.026 |
| CH_UK      | -0.006 | 0.035 | -0.186 | 0.853 |
| SYMPERS2   | -0.006 | 0.029 | -0.219 | 0.826 |
| SYMPOTHER2 | 0.011  | 0.029 | 0.391  | 0.696 |
| CONSERV6   | 0.403  | 0.031 | 12.950 | 0.000 |
| UNI4       | 0.008  | 0.031 | 0.244  | 0.808 |
| BENEV2     | 0.049  | 0.032 | 1.539  | 0.124 |
| SOCDESGEN8 | 0.001  | 0.030 | 0.026  | 0.979 |
| COVWORRY2  | 0.159  | 0.029 | 5.406  | 0.000 |
| OUTDOOR    | -0.018 | 0.028 | -0.625 | 0.532 |

#### DISTCOV3 ON

|            |       |       |       |       |
|------------|-------|-------|-------|-------|
| AGE        | 0.033 | 0.036 | 0.927 | 0.354 |
| MALE       | 0.006 | 0.032 | 0.175 | 0.861 |
| CH_FR      | 0.073 | 0.038 | 1.911 | 0.056 |
| CH_ESP     | 0.070 | 0.037 | 1.889 | 0.059 |
| CH_UK      | 0.207 | 0.039 | 5.340 | 0.000 |
| SYMPERS2   | 0.064 | 0.032 | 1.987 | 0.047 |
| SYMPOTHER2 | 0.069 | 0.032 | 2.139 | 0.032 |
| CONSERV6   | 0.032 | 0.037 | 0.857 | 0.391 |
| UNI4       | 0.061 | 0.035 | 1.739 | 0.082 |
| BENEV2     | 0.037 | 0.036 | 1.048 | 0.295 |

|            |        |       |        |       |
|------------|--------|-------|--------|-------|
| SOCDESGEN8 | -0.138 | 0.034 | -4.062 | 0.000 |
| COVWORRY2  | 0.208  | 0.033 | 6.366  | 0.000 |
| OUTDOOR    | 0.037  | 0.032 | 1.153  | 0.249 |

#### HYPCOVID ON

|            |        |       |        |       |
|------------|--------|-------|--------|-------|
| AGE        | -0.070 | 0.036 | -1.915 | 0.055 |
| MALE       | 0.040  | 0.032 | 1.223  | 0.221 |
| CH_FR      | -0.051 | 0.039 | -1.318 | 0.187 |
| CH_ESP     | -0.013 | 0.037 | -0.359 | 0.720 |
| CH_UK      | 0.158  | 0.039 | 4.004  | 0.000 |
| SYMPERS2   | -0.026 | 0.033 | -0.809 | 0.419 |
| SYMPOTHER2 | 0.051  | 0.033 | 1.557  | 0.119 |
| CONSERV6   | 0.145  | 0.037 | 3.924  | 0.000 |
| UNI4       | 0.039  | 0.036 | 1.084  | 0.278 |
| BENEV2     | 0.001  | 0.036 | 0.041  | 0.968 |
| SOCDESGEN8 | 0.034  | 0.035 | 0.995  | 0.320 |
| COVWORRY2  | 0.233  | 0.033 | 7.115  | 0.000 |
| OUTDOOR    | 0.023  | 0.032 | 0.707  | 0.480 |

#### CHANGEOP ON

|            |        |       |        |       |
|------------|--------|-------|--------|-------|
| AGE        | -0.005 | 0.035 | -0.147 | 0.883 |
| MALE       | -0.095 | 0.031 | -3.064 | 0.002 |
| CH_FR      | 0.073  | 0.037 | 1.961  | 0.050 |
| CH_ESP     | 0.079  | 0.036 | 2.178  | 0.029 |
| CH_UK      | -0.050 | 0.038 | -1.304 | 0.192 |
| SYMPERS2   | 0.004  | 0.032 | 0.135  | 0.892 |
| SYMPOTHER2 | -0.068 | 0.031 | -2.170 | 0.030 |
| CONSERV6   | 0.035  | 0.036 | 0.976  | 0.329 |
| UNI4       | 0.350  | 0.033 | 10.671 | 0.000 |
| BENEV2     | -0.076 | 0.035 | -2.187 | 0.029 |
| SOCDESGEN8 | 0.010  | 0.033 | 0.307  | 0.759 |
| COVWORRY2  | 0.122  | 0.032 | 3.803  | 0.000 |
| OUTDOOR    | -0.034 | 0.031 | -1.109 | 0.268 |

#### MEAS\_OTH WITH

|            |       |       |        |       |
|------------|-------|-------|--------|-------|
| MEAS_SELF4 | 0.615 | 0.021 | 29.757 | 0.000 |
|------------|-------|-------|--------|-------|

#### Intercepts

|            |       |       |       |       |
|------------|-------|-------|-------|-------|
| PBCL5      | 0.233 | 0.408 | 0.570 | 0.569 |
| DISTCOV3   | 2.424 | 0.364 | 6.651 | 0.000 |
| HYPCOVID1  | 3.246 | 0.381 | 8.516 | 0.000 |
| DISTCLIM6  | 0.936 | 0.328 | 2.853 | 0.004 |
| MEAS_OTH8  | 2.482 | 0.346 | 7.164 | 0.000 |
| MEAS_SELF4 | 0.511 | 0.316 | 1.619 | 0.106 |
| INTEROTH6  | 1.981 | 0.387 | 5.121 | 0.000 |
| CHANGEOP   | 0.731 | 0.345 | 2.115 | 0.034 |

#### Residual Variances

|          |       |       |        |       |
|----------|-------|-------|--------|-------|
| PBCL5    | 0.917 | 0.018 | 51.743 | 0.000 |
| DISTCOV3 | 0.870 | 0.021 | 41.752 | 0.000 |

|            |       |       |        |       |
|------------|-------|-------|--------|-------|
| HYPCOVID1  | 0.878 | 0.020 | 42.889 | 0.000 |
| DISTCLIM6  | 0.589 | 0.025 | 23.666 | 0.000 |
| MEAS_OTH8  | 0.742 | 0.025 | 29.621 | 0.000 |
| MEAS_SELF4 | 0.687 | 0.026 | 26.926 | 0.000 |
| INTEROTH6  | 0.779 | 0.024 | 31.984 | 0.000 |
| CHANGEOP   | 0.807 | 0.024 | 34.124 | 0.000 |

## R-SQUARE

| Observed<br>Variable | Estimate | S.E.  | Two-Tailed<br>Est./S.E. | P-Value |
|----------------------|----------|-------|-------------------------|---------|
| PBCL5                | 0.083    | 0.018 | 4.673                   | 0.000   |
| DISTCOV3             | 0.130    | 0.021 | 6.243                   | 0.000   |
| HYPCOVID             | 0.122    | 0.020 | 5.958                   | 0.000   |
| DISTCLIM             | 0.411    | 0.025 | 16.548                  | 0.000   |
| MEAS_OTH             | 0.258    | 0.025 | 10.321                  | 0.000   |
| MEAS_SEL             | 0.313    | 0.026 | 12.253                  | 0.000   |
| INTEROTH             | 0.221    | 0.024 | 9.093                   | 0.000   |
| CHANGEOP             | 0.193    | 0.024 | 8.148                   | 0.000   |

## STANDARDIZED TOTAL, TOTAL INDIRECT, SPECIFIC INDIRECT, AND DIRECT EFFECTS

### STDYX Standardization

|                                | Estimate | S.E.  | Two-Tailed<br>Est./S.E. | P-Value |
|--------------------------------|----------|-------|-------------------------|---------|
| Effects from MEAS_OTH to PBCL5 |          |       |                         |         |
| Total                          | 0.002    | 0.048 | 0.039                   | 0.969   |
| Total indirect                 | 0.007    | 0.008 | 0.876                   | 0.381   |
| Specific indirect 1            |          |       |                         |         |
| PBCL5                          |          |       |                         |         |
| DISTCLIM                       |          |       |                         |         |
| MEAS_OTH                       | 0.000    | 0.006 | 0.080                   | 0.936   |
| Specific indirect 2            |          |       |                         |         |
| PBCL5                          |          |       |                         |         |
| INTEROTH                       |          |       |                         |         |
| MEAS_OTH                       | 0.006    | 0.005 | 1.286                   | 0.198   |
| Direct                         |          |       |                         |         |
| PBCL5                          |          |       |                         |         |
| MEAS_OTH                       | -0.005   | 0.048 | -0.105                  | 0.916   |

#### Effects from MEAS\_SEL to PBCL5

|                |        |       |        |       |
|----------------|--------|-------|--------|-------|
| Total          | -0.063 | 0.049 | -1.278 | 0.201 |
| Total indirect | -0.004 | 0.006 | -0.735 | 0.463 |

#### Specific indirect 1

|          |       |       |        |       |
|----------|-------|-------|--------|-------|
| PBCL5    |       |       |        |       |
| DISTCLIM |       |       |        |       |
| MEAS_SEL | 0.000 | 0.004 | -0.080 | 0.936 |

#### Specific indirect 2

|          |        |       |        |       |
|----------|--------|-------|--------|-------|
| PBCL5    |        |       |        |       |
| INTEROTH |        |       |        |       |
| MEAS_SEL | -0.004 | 0.005 | -0.854 | 0.393 |

#### Direct

|          |        |       |        |       |
|----------|--------|-------|--------|-------|
| PBCL5    |        |       |        |       |
| MEAS_SEL | -0.058 | 0.049 | -1.190 | 0.234 |

Effects from DISTCOV3 to PBCL5

|                |        |       |        |       |
|----------------|--------|-------|--------|-------|
| Total          | 0.016  | 0.035 | 0.448  | 0.654 |
| Total indirect | -0.011 | 0.009 | -1.301 | 0.193 |

#### Specific indirect 1

|          |       |       |       |       |
|----------|-------|-------|-------|-------|
| PBCL5    |       |       |       |       |
| DISTCLIM |       |       |       |       |
| DISTCOV3 | 0.001 | 0.007 | 0.080 | 0.936 |

#### Specific indirect 2

|          |        |       |        |       |
|----------|--------|-------|--------|-------|
| PBCL5    |        |       |        |       |
| INTEROTH |        |       |        |       |
| DISTCOV3 | -0.012 | 0.005 | -2.222 | 0.026 |

#### Direct

|          |       |       |       |       |
|----------|-------|-------|-------|-------|
| PBCL5    |       |       |       |       |
| DISTCOV3 | 0.027 | 0.035 | 0.752 | 0.452 |

#### Effects from HYPCOVID to PBCL5

|                |        |       |        |       |
|----------------|--------|-------|--------|-------|
| Total          | -0.057 | 0.035 | -1.662 | 0.096 |
| Total indirect | 0.004  | 0.005 | 0.778  | 0.437 |

#### Specific indirect 1

|          |       |       |       |       |
|----------|-------|-------|-------|-------|
| PBCL5    |       |       |       |       |
| DISTCLIM |       |       |       |       |
| HYPCOVID | 0.000 | 0.004 | 0.080 | 0.936 |

## Specific indirect 2

PBCL5

INTEROTH

HYPCOVID 0.004 0.003 1.127 0.260

## Direct

PBCL5

HYPCOVID -0.062 0.035 -1.778 0.075

## ONFIDENCE INTERVALS OF STANDARDIZED MODEL RESULTS

STDYX Standardization

|  | Lower .5% | Lower 2.5% | Lower 5% | Estimate | Upper 5% | Upper 2.5% | Upper .5% |
|--|-----------|------------|----------|----------|----------|------------|-----------|
|--|-----------|------------|----------|----------|----------|------------|-----------|

## PBCL5 ON

|            |        |        |        |        |        |        |        |
|------------|--------|--------|--------|--------|--------|--------|--------|
| INTEROTH6  | 0.009  | 0.031  | 0.042  | 0.101  | 0.161  | 0.172  | 0.194  |
| DISTCLIM6  | -0.104 | -0.078 | -0.065 | 0.003  | 0.072  | 0.085  | 0.110  |
| MEAS_OTH8  | -0.128 | -0.099 | -0.084 | -0.005 | 0.074  | 0.089  | 0.118  |
| MEAS_SELF4 | -0.184 | -0.154 | -0.139 | -0.058 | 0.022  | 0.038  | 0.068  |
| DISTCOV3   | -0.064 | -0.043 | -0.032 | 0.027  | 0.085  | 0.096  | 0.118  |
| HYPCOVID1  | -0.151 | -0.130 | -0.119 | -0.062 | -0.005 | 0.006  | 0.028  |
| AGE        | -0.086 | -0.062 | -0.050 | 0.013  | 0.076  | 0.088  | 0.112  |
| MALE       | -0.072 | -0.051 | -0.041 | 0.015  | 0.070  | 0.080  | 0.101  |
| CH_FR      | -0.207 | -0.182 | -0.169 | -0.104 | -0.038 | -0.025 | 0.000  |
| CH_ESP     | -0.063 | -0.039 | -0.027 | 0.037  | 0.101  | 0.113  | 0.137  |
| CH_UK      | -0.041 | -0.015 | -0.002 | 0.066  | 0.134  | 0.147  | 0.172  |
| SYMPERS2   | -0.084 | -0.063 | -0.053 | 0.002  | 0.058  | 0.068  | 0.089  |
| SYMPOTHER2 | -0.091 | -0.070 | -0.060 | -0.004 | 0.052  | 0.063  | 0.084  |
| CONSERV6   | -0.145 | -0.119 | -0.106 | -0.037 | 0.032  | 0.045  | 0.071  |
| UNI4       | 0.015  | 0.040  | 0.054  | 0.122  | 0.190  | 0.203  | 0.228  |
| BENEV2     | -0.118 | -0.094 | -0.082 | -0.020 | 0.042  | 0.054  | 0.077  |
| SOCDESGEN8 | -0.088 | -0.065 | -0.053 | 0.009  | 0.071  | 0.083  | 0.107  |
| SOCDESENV4 | -0.246 | -0.225 | -0.214 | -0.156 | -0.099 | -0.088 | -0.066 |
| COVWORRY2  | -0.076 | -0.053 | -0.041 | 0.020  | 0.082  | 0.094  | 0.117  |
| OUTDOOR    | -0.076 | -0.056 | -0.045 | 0.009  | 0.062  | 0.073  | 0.093  |
| CHANGEOP   | -0.038 | -0.014 | -0.001 | 0.062  | 0.126  | 0.138  | 0.162  |

## INTEROTH ON

|            |        |        |        |        |        |        |        |
|------------|--------|--------|--------|--------|--------|--------|--------|
| MEAS_OTH8  | -0.049 | -0.023 | -0.009 | 0.063  | 0.135  | 0.149  | 0.176  |
| MEAS_SELF4 | -0.156 | -0.128 | -0.114 | -0.040 | 0.034  | 0.048  | 0.075  |
| DISTCOV3   | -0.196 | -0.176 | -0.166 | -0.114 | -0.062 | -0.052 | -0.033 |
| HYPCOVID1  | -0.042 | -0.023 | -0.013 | 0.039  | 0.091  | 0.101  | 0.120  |
| AGE        | -0.095 | -0.073 | -0.062 | -0.004 | 0.054  | 0.065  | 0.087  |
| MALE       | -0.006 | 0.013  | 0.022  | 0.073  | 0.124  | 0.133  | 0.152  |
| CH_FR      | -0.238 | -0.215 | -0.204 | -0.144 | -0.084 | -0.072 | -0.050 |
| CH_ESP     | -0.204 | -0.182 | -0.171 | -0.112 | -0.054 | -0.043 | -0.021 |
| CH_UK      | -0.087 | -0.064 | -0.052 | 0.011  | 0.074  | 0.086  | 0.109  |
| SYMPERS2   | -0.146 | -0.127 | -0.118 | -0.067 | -0.016 | -0.006 | 0.013  |
| SYMPOTHER2 | -0.013 | 0.006  | 0.016  | 0.067  | 0.119  | 0.129  | 0.148  |

|            |        |        |        |        |       |       |       |
|------------|--------|--------|--------|--------|-------|-------|-------|
| CONSERV6   | -0.026 | -0.003 | 0.009  | 0.072  | 0.135 | 0.147 | 0.171 |
| UNI4       | -0.037 | -0.015 | -0.004 | 0.055  | 0.114 | 0.126 | 0.148 |
| BENEV2     | 0.122  | 0.143  | 0.153  | 0.208  | 0.264 | 0.274 | 0.295 |
| SOCDESGEN8 | -0.054 | -0.033 | -0.023 | 0.034  | 0.090 | 0.101 | 0.122 |
| SOCDESENV4 | -0.115 | -0.095 | -0.085 | -0.032 | 0.021 | 0.031 | 0.051 |
| COVWORRY2  | 0.169  | 0.189  | 0.200  | 0.253  | 0.307 | 0.317 | 0.338 |
| OUTDOOR    | -0.016 | 0.003  | 0.012  | 0.062  | 0.111 | 0.121 | 0.139 |
| CHANGEOP   | -0.023 | -0.003 | 0.008  | 0.063  | 0.118 | 0.129 | 0.149 |

#### DISTCLIM ON

|            |        |        |        |        |        |        |        |
|------------|--------|--------|--------|--------|--------|--------|--------|
| MEAS_OTH8  | 0.051  | 0.074  | 0.086  | 0.149  | 0.212  | 0.224  | 0.248  |
| MEAS_SELF4 | -0.187 | -0.163 | -0.151 | -0.087 | -0.022 | -0.010 | 0.014  |
| DISTCOV3   | 0.087  | 0.104  | 0.113  | 0.158  | 0.203  | 0.212  | 0.229  |
| HYPCOVID1  | 0.033  | 0.050  | 0.059  | 0.104  | 0.149  | 0.158  | 0.175  |
| AGE        | -0.134 | -0.115 | -0.105 | -0.055 | -0.004 | 0.005  | 0.024  |
| MALE       | -0.105 | -0.088 | -0.080 | -0.036 | 0.008  | 0.017  | 0.033  |
| CH_FR      | -0.074 | -0.054 | -0.044 | 0.008  | 0.061  | 0.071  | 0.091  |
| CH_ESP     | -0.047 | -0.028 | -0.018 | 0.033  | 0.084  | 0.093  | 0.112  |
| CH_UK      | -0.034 | -0.013 | -0.003 | 0.052  | 0.106  | 0.116  | 0.137  |
| SYMPERS2   | -0.076 | -0.060 | -0.051 | -0.007 | 0.037  | 0.046  | 0.063  |
| SYMPOTHER2 | -0.101 | -0.084 | -0.076 | -0.031 | 0.014  | 0.023  | 0.039  |
| CONSERV6   | -0.179 | -0.159 | -0.148 | -0.093 | -0.038 | -0.028 | -0.007 |
| UNI4       | 0.263  | 0.282  | 0.292  | 0.342  | 0.392  | 0.401  | 0.420  |
| BENEV2     | -0.139 | -0.121 | -0.111 | -0.063 | -0.014 | -0.004 | 0.014  |
| SOCDESGEN8 | -0.233 | -0.215 | -0.205 | -0.156 | -0.108 | -0.098 | -0.080 |
| SOCDESENV4 | -0.001 | 0.016  | 0.025  | 0.071  | 0.117  | 0.126  | 0.144  |
| COVWORRY2  | -0.110 | -0.092 | -0.083 | -0.035 | 0.013  | 0.022  | 0.040  |
| OUTDOOR    | -0.058 | -0.041 | -0.033 | 0.010  | 0.053  | 0.061  | 0.077  |
| CHANGEOP   | 0.258  | 0.276  | 0.285  | 0.332  | 0.379  | 0.388  | 0.406  |

#### MEAS\_OTH ON

|            |        |        |        |        |        |        |       |
|------------|--------|--------|--------|--------|--------|--------|-------|
| AGE        | -0.022 | -0.002 | 0.009  | 0.063  | 0.118  | 0.128  | 0.149 |
| MALE       | -0.139 | -0.121 | -0.111 | -0.062 | -0.013 | -0.004 | 0.014 |
| CH_FR      | -0.132 | -0.110 | -0.099 | -0.040 | 0.018  | 0.029  | 0.051 |
| CH_ESP     | -0.165 | -0.144 | -0.133 | -0.076 | -0.020 | -0.009 | 0.012 |
| CH_UK      | -0.094 | -0.071 | -0.060 | 0.000  | 0.059  | 0.071  | 0.093 |
| SYMPERS2   | -0.026 | -0.008 | 0.002  | 0.051  | 0.101  | 0.110  | 0.128 |
| SYMPOTHER2 | 0.015  | 0.034  | 0.043  | 0.092  | 0.141  | 0.151  | 0.169 |
| CONSERV6   | 0.301  | 0.321  | 0.332  | 0.385  | 0.439  | 0.449  | 0.469 |
| UNI4       | -0.003 | 0.018  | 0.028  | 0.082  | 0.135  | 0.146  | 0.166 |
| BENEV2     | -0.043 | -0.022 | -0.012 | 0.042  | 0.097  | 0.107  | 0.127 |
| SOCDESGEN8 | -0.157 | -0.137 | -0.127 | -0.075 | -0.024 | -0.014 | 0.006 |
| COVWORRY2  | 0.078  | 0.096  | 0.106  | 0.156  | 0.206  | 0.216  | 0.235 |
| OUTDOOR    | -0.105 | -0.087 | -0.077 | -0.029 | 0.019  | 0.028  | 0.046 |

#### MEAS\_SEL ON

|        |        |        |        |        |        |        |        |
|--------|--------|--------|--------|--------|--------|--------|--------|
| AGE    | 0.131  | 0.150  | 0.160  | 0.212  | 0.264  | 0.274  | 0.294  |
| MALE   | -0.151 | -0.133 | -0.124 | -0.077 | -0.030 | -0.021 | -0.003 |
| CH_FR  | -0.121 | -0.100 | -0.089 | -0.033 | 0.024  | 0.034  | 0.055  |
| CH_ESP | -0.159 | -0.139 | -0.128 | -0.074 | -0.019 | -0.009 | 0.011  |

|            |        |        |        |        |       |       |       |
|------------|--------|--------|--------|--------|-------|-------|-------|
| CH_UK      | -0.096 | -0.075 | -0.064 | -0.006 | 0.051 | 0.062 | 0.083 |
| SYMPERS2   | -0.081 | -0.063 | -0.054 | -0.006 | 0.041 | 0.050 | 0.068 |
| SYMPOTHER2 | -0.063 | -0.045 | -0.036 | 0.011  | 0.059 | 0.068 | 0.086 |
| CONSERV6   | 0.323  | 0.342  | 0.352  | 0.403  | 0.454 | 0.464 | 0.483 |
| UNI4       | -0.073 | -0.054 | -0.044 | 0.008  | 0.059 | 0.069 | 0.089 |
| BENEV2     | -0.033 | -0.013 | -0.003 | 0.049  | 0.101 | 0.111 | 0.131 |
| SOCDESGEN8 | -0.078 | -0.059 | -0.049 | 0.001  | 0.051 | 0.060 | 0.079 |
| COVWORRY2  | 0.083  | 0.101  | 0.111  | 0.159  | 0.207 | 0.216 | 0.235 |
| OUTDOOR    | -0.090 | -0.073 | -0.064 | -0.018 | 0.029 | 0.038 | 0.055 |

#### DISTCOV3 ON

|            |        |        |        |        |        |        |        |
|------------|--------|--------|--------|--------|--------|--------|--------|
| AGE        | -0.059 | -0.037 | -0.026 | 0.033  | 0.092  | 0.104  | 0.126  |
| MALE       | -0.077 | -0.058 | -0.047 | 0.006  | 0.059  | 0.069  | 0.089  |
| CH_FR      | -0.026 | -0.002 | 0.010  | 0.073  | 0.137  | 0.149  | 0.172  |
| CH_ESP     | -0.026 | -0.003 | 0.009  | 0.070  | 0.131  | 0.143  | 0.166  |
| CH_UK      | 0.107  | 0.131  | 0.143  | 0.207  | 0.271  | 0.283  | 0.307  |
| SYMPERS2   | -0.019 | 0.001  | 0.011  | 0.064  | 0.118  | 0.128  | 0.148  |
| SYMPOTHER2 | -0.014 | 0.006  | 0.016  | 0.069  | 0.123  | 0.133  | 0.153  |
| CONSERV6   | -0.063 | -0.041 | -0.029 | 0.032  | 0.092  | 0.104  | 0.127  |
| UNI4       | -0.030 | -0.008 | 0.003  | 0.061  | 0.120  | 0.131  | 0.153  |
| BENEV2     | -0.055 | -0.033 | -0.021 | 0.037  | 0.096  | 0.108  | 0.130  |
| SOCDESGEN8 | -0.226 | -0.205 | -0.194 | -0.138 | -0.082 | -0.072 | -0.051 |
| COVWORRY2  | 0.124  | 0.144  | 0.154  | 0.208  | 0.262  | 0.272  | 0.293  |
| OUTDOOR    | -0.045 | -0.026 | -0.016 | 0.037  | 0.089  | 0.099  | 0.118  |

#### HYPCOVID ON

|            |        |        |        |        |        |       |       |
|------------|--------|--------|--------|--------|--------|-------|-------|
| AGE        | -0.164 | -0.141 | -0.130 | -0.070 | -0.010 | 0.002 | 0.024 |
| MALE       | -0.044 | -0.024 | -0.014 | 0.040  | 0.093  | 0.103 | 0.123 |
| CH_FR      | -0.151 | -0.127 | -0.115 | -0.051 | 0.013  | 0.025 | 0.049 |
| CH_ESP     | -0.110 | -0.087 | -0.075 | -0.013 | 0.048  | 0.060 | 0.083 |
| CH_UK      | 0.056  | 0.080  | 0.093  | 0.158  | 0.222  | 0.235 | 0.259 |
| SYMPERS2   | -0.111 | -0.090 | -0.080 | -0.026 | 0.027  | 0.038 | 0.058 |
| SYMPOTHER2 | -0.033 | -0.013 | -0.003 | 0.051  | 0.105  | 0.115 | 0.135 |
| CONSERV6   | 0.050  | 0.073  | 0.084  | 0.145  | 0.206  | 0.218 | 0.240 |
| UNI4       | -0.053 | -0.031 | -0.020 | 0.039  | 0.097  | 0.109 | 0.131 |
| BENEV2     | -0.092 | -0.070 | -0.058 | 0.001  | 0.061  | 0.073 | 0.095 |
| SOCDESGEN8 | -0.055 | -0.033 | -0.022 | 0.034  | 0.091  | 0.102 | 0.123 |
| COVWORRY2  | 0.149  | 0.169  | 0.179  | 0.233  | 0.287  | 0.297 | 0.317 |
| OUTDOOR    | -0.060 | -0.040 | -0.030 | 0.023  | 0.075  | 0.085 | 0.105 |

#### CHANGEOP ON

|            |        |        |        |        |        |        |        |
|------------|--------|--------|--------|--------|--------|--------|--------|
| AGE        | -0.095 | -0.074 | -0.063 | -0.005 | 0.052  | 0.063  | 0.085  |
| MALE       | -0.176 | -0.156 | -0.147 | -0.095 | -0.044 | -0.034 | -0.015 |
| CH_FR      | -0.023 | 0.000  | 0.012  | 0.073  | 0.134  | 0.146  | 0.169  |
| CH_ESP     | -0.014 | 0.008  | 0.019  | 0.079  | 0.138  | 0.149  | 0.172  |
| CH_UK      | -0.147 | -0.124 | -0.112 | -0.050 | 0.013  | 0.025  | 0.048  |
| SYMPERS2   | -0.078 | -0.058 | -0.048 | 0.004  | 0.057  | 0.067  | 0.086  |
| SYMPOTHER2 | -0.149 | -0.130 | -0.120 | -0.068 | -0.016 | -0.007 | 0.013  |
| CONSERV6   | -0.057 | -0.035 | -0.024 | 0.035  | 0.094  | 0.105  | 0.127  |
| UNI4       | 0.265  | 0.286  | 0.296  | 0.350  | 0.404  | 0.414  | 0.434  |



|           |        |        |        |        |        |        |       |
|-----------|--------|--------|--------|--------|--------|--------|-------|
| BENEV2    | -0.166 | -0.145 | -0.134 | -0.076 | -0.019 | -0.008 | 0.014 |
| SOCDEGEN8 | -0.075 | -0.055 | -0.044 | 0.010  | 0.065  | 0.075  | 0.096 |
| COVWORRY2 | 0.039  | 0.059  | 0.069  | 0.122  | 0.175  | 0.185  | 0.204 |
| OUTDOOR   | -0.113 | -0.094 | -0.084 | -0.034 | 0.016  | 0.026  | 0.045 |

#### MEAS\_OTH WITH

|            |       |       |       |       |       |       |       |
|------------|-------|-------|-------|-------|-------|-------|-------|
| MEAS_SELF4 | 0.562 | 0.574 | 0.581 | 0.615 | 0.649 | 0.655 | 0.668 |
|------------|-------|-------|-------|-------|-------|-------|-------|

#### Intercepts

|          |        |        |        |       |       |       |       |
|----------|--------|--------|--------|-------|-------|-------|-------|
| PBCL5    | -0.819 | -0.567 | -0.439 | 0.233 | 0.904 | 1.032 | 1.284 |
| DISTCOV3 | 1.485  | 1.709  | 1.824  | 2.424 | 3.023 | 3.138 | 3.362 |
| HYPCOVID | 2.264  | 2.499  | 2.619  | 3.246 | 3.873 | 3.993 | 4.228 |
| DISTCLIM | 0.091  | 0.293  | 0.396  | 0.936 | 1.476 | 1.579 | 1.781 |
| MEAS_OTH | 1.589  | 1.803  | 1.912  | 2.482 | 3.052 | 3.161 | 3.374 |
| MEAS_SEL | -0.302 | -0.108 | -0.008 | 0.511 | 1.031 | 1.131 | 1.325 |
| INTEROTH | 0.984  | 1.222  | 1.344  | 1.981 | 2.617 | 2.739 | 2.977 |
| CHANGEOP | -0.159 | 0.054  | 0.162  | 0.731 | 1.299 | 1.407 | 1.620 |

#### Residual Variances

|          |       |       |       |       |       |       |       |
|----------|-------|-------|-------|-------|-------|-------|-------|
| PBCL5    | 0.872 | 0.882 | 0.888 | 0.917 | 0.946 | 0.952 | 0.963 |
| DISTCOV3 | 0.816 | 0.829 | 0.836 | 0.870 | 0.904 | 0.911 | 0.924 |
| HYPCOVID | 0.825 | 0.838 | 0.844 | 0.878 | 0.912 | 0.918 | 0.931 |
| DISTCLIM | 0.524 | 0.540 | 0.548 | 0.589 | 0.629 | 0.637 | 0.653 |
| MEAS_OTH | 0.677 | 0.693 | 0.700 | 0.742 | 0.783 | 0.791 | 0.806 |
| MEAS_SEL | 0.622 | 0.637 | 0.645 | 0.687 | 0.729 | 0.737 | 0.753 |
| INTEROTH | 0.716 | 0.731 | 0.739 | 0.779 | 0.819 | 0.826 | 0.841 |
| CHANGEOP | 0.746 | 0.761 | 0.768 | 0.807 | 0.846 | 0.854 | 0.868 |

#### CONFIDENCE INTERVALS OF STANDARDIZED TOTAL, TOTAL INDIRECT, SPECIFIC INDIRECT, AND DIRECT EFFECTS

##### STDYX Standardization

Lower .5% Lower 2.5% Lower 5% Estimate Upper 5% Upper 2.5% Upper .5%

##### Effects from MEAS\_OTH to PBCL5

|                |        |        |        |       |       |       |       |
|----------------|--------|--------|--------|-------|-------|-------|-------|
| Total          | -0.121 | -0.092 | -0.077 | 0.002 | 0.080 | 0.095 | 0.125 |
| Total indirect | -0.013 | -0.009 | -0.006 | 0.007 | 0.020 | 0.022 | 0.027 |

##### Specific indirect 1

|          |        |        |        |       |       |       |       |
|----------|--------|--------|--------|-------|-------|-------|-------|
| PBCL5    |        |        |        |       |       |       |       |
| DISTCLIM |        |        |        |       |       |       |       |
| MEAS_OTH | -0.015 | -0.012 | -0.010 | 0.000 | 0.011 | 0.013 | 0.016 |

##### Specific indirect 2

|          |        |        |        |       |       |       |       |
|----------|--------|--------|--------|-------|-------|-------|-------|
| PBCL5    |        |        |        |       |       |       |       |
| INTEROTH |        |        |        |       |       |       |       |
| MEAS_OTH | -0.006 | -0.003 | -0.002 | 0.006 | 0.015 | 0.016 | 0.019 |

|          |        |        |        |        |       |       |       |
|----------|--------|--------|--------|--------|-------|-------|-------|
| Direct   |        |        |        |        |       |       |       |
| PBCL5    |        |        |        |        |       |       |       |
| MEAS_OTH | -0.128 | -0.099 | -0.084 | -0.005 | 0.074 | 0.089 | 0.118 |

#### Effects from MEAS\_SEL to PBCL5

|                     |        |        |        |        |       |       |       |
|---------------------|--------|--------|--------|--------|-------|-------|-------|
| Total               | -0.189 | -0.159 | -0.143 | -0.063 | 0.018 | 0.033 | 0.064 |
| Total indirect      | -0.020 | -0.016 | -0.014 | -0.004 | 0.005 | 0.007 | 0.011 |
| Specific indirect 1 |        |        |        |        |       |       |       |
| PBCL5               |        |        |        |        |       |       |       |
| DISTCLIM            |        |        |        |        |       |       |       |
| MEAS_SEL            | -0.010 | -0.007 | -0.006 | 0.000  | 0.006 | 0.007 | 0.009 |
| Specific indirect 2 |        |        |        |        |       |       |       |
| PBCL5               |        |        |        |        |       |       |       |
| INTEROTH            |        |        |        |        |       |       |       |
| MEAS_SEL            | -0.016 | -0.013 | -0.012 | -0.004 | 0.004 | 0.005 | 0.008 |

|          |        |        |        |        |       |       |       |
|----------|--------|--------|--------|--------|-------|-------|-------|
| Direct   |        |        |        |        |       |       |       |
| PBCL5    |        |        |        |        |       |       |       |
| MEAS_SEL | -0.184 | -0.154 | -0.139 | -0.058 | 0.022 | 0.038 | 0.068 |

#### Effects from DISTCOV3 to PBCL5

|                     |        |        |        |        |        |        |       |
|---------------------|--------|--------|--------|--------|--------|--------|-------|
| Total               | -0.074 | -0.052 | -0.041 | 0.016  | 0.072  | 0.083  | 0.105 |
| Total indirect      | -0.033 | -0.028 | -0.025 | -0.011 | 0.003  | 0.006  | 0.011 |
| Specific indirect 1 |        |        |        |        |        |        |       |
| PBCL5               |        |        |        |        |        |        |       |
| DISTCLIM            |        |        |        |        |        |        |       |
| DISTCOV3            | -0.016 | -0.012 | -0.010 | 0.001  | 0.011  | 0.013  | 0.017 |
| Specific indirect 2 |        |        |        |        |        |        |       |
| PBCL5               |        |        |        |        |        |        |       |
| INTEROTH            |        |        |        |        |        |        |       |
| DISTCOV3            | -0.025 | -0.022 | -0.020 | -0.012 | -0.003 | -0.001 | 0.002 |
| Direct              |        |        |        |        |        |        |       |
| PBCL5               |        |        |        |        |        |        |       |
| DISTCOV3            | -0.064 | -0.043 | -0.032 | 0.027  | 0.085  | 0.096  | 0.118 |

#### Effects from HYPCOVID to PBCL5

|                     |        |        |        |        |        |       |       |
|---------------------|--------|--------|--------|--------|--------|-------|-------|
| Total               | -0.146 | -0.125 | -0.114 | -0.057 | -0.001 | 0.010 | 0.032 |
| Total indirect      | -0.010 | -0.007 | -0.005 | 0.004  | 0.013  | 0.015 | 0.018 |
| Specific indirect 1 |        |        |        |        |        |       |       |
| PBCL5               |        |        |        |        |        |       |       |
| DISTCLIM            |        |        |        |        |        |       |       |
| HYPCOVID            | -0.011 | -0.008 | -0.007 | 0.000  | 0.007  | 0.009 | 0.011 |

|                     |        |        |        |        |        |       |       |
|---------------------|--------|--------|--------|--------|--------|-------|-------|
| Specific indirect 2 |        |        |        |        |        |       |       |
| PBCL5               |        |        |        |        |        |       |       |
| INTEROTH            |        |        |        |        |        |       |       |
| HYPCOVID            | -0.005 | -0.003 | -0.002 | 0.004  | 0.010  | 0.011 | 0.013 |
| Direct              |        |        |        |        |        |       |       |
| PBCL5               |        |        |        |        |        |       |       |
| HYPCOVID            | -0.151 | -0.130 | -0.119 | -0.062 | -0.005 | 0.006 | 0.028 |

Predicting Class 2 : the disengaged

THE MODEL ESTIMATION TERMINATED NORMALLY

#### MODEL FIT INFORMATION

Number of Free Parameters 141

#### Loglikelihood

H0 Value -8463.734  
H1 Value -8429.730

#### Information Criteria

Akaike (AIC) 17209.468  
Bayesian (BIC) 17887.698  
Sample-Size Adjusted BIC 17439.903  
( $n^* = (n + 2) / 24$ )

#### Chi-Square Test of Model Fit

Value 68.007  
Degrees of Freedom 15  
P-Value 0.0000

#### RMSEA (Root Mean Square Error Of Approximation)

Estimate 0.062  
90 Percent C.I. 0.048 0.078  
Probability RMSEA  $\leq$  .05 0.079

#### CFI/TLI

CFI 0.977  
TLI 0.782

#### Chi-Square Test of Model Fit for the Baseline Model

Value 2413.318

|                    |        |
|--------------------|--------|
| Degrees of Freedom | 140    |
| P-Value            | 0.0000 |

SRMR (Standardized Root Mean Square Residual)

|       |       |
|-------|-------|
| Value | 0.023 |
|-------|-------|

## STANDARDIZED MODEL RESULTS

STDYX Standardization

|            | Estimate | S.E.  | Two-Tailed<br>Est./S.E. | P-Value |
|------------|----------|-------|-------------------------|---------|
| PBCL2 ON   |          |       |                         |         |
| INTEROTH6  | 0.016    | 0.035 | 0.462                   | 0.644   |
| DISTCLIM6  | -0.065   | 0.040 | -1.636                  | 0.102   |
| MEAS_OTH8  | -0.035   | 0.046 | -0.748                  | 0.455   |
| MEAS_SELF4 | 0.088    | 0.047 | 1.867                   | 0.062   |
| DISTCOV3   | -0.024   | 0.034 | -0.707                  | 0.480   |
| HYPCOVID1  | 0.033    | 0.033 | 1.001                   | 0.317   |
| AGE        | 0.085    | 0.037 | 2.290                   | 0.022   |
| MALE       | -0.012   | 0.032 | -0.369                  | 0.712   |
| CH_FR      | -0.063   | 0.039 | -1.629                  | 0.103   |
| CH_ESP     | -0.057   | 0.037 | -1.516                  | 0.129   |
| CH_UK      | -0.106   | 0.040 | -2.657                  | 0.008   |
| SYMPERS2   | -0.017   | 0.032 | -0.515                  | 0.607   |
| SYMPOTHER2 | -0.010   | 0.033 | -0.315                  | 0.753   |
| CONSERV6   | 0.167    | 0.040 | 4.166                   | 0.000   |
| UNI4       | -0.212   | 0.040 | -5.359                  | 0.000   |
| BENEV2     | 0.009    | 0.036 | 0.257                   | 0.797   |
| SOCDESGEN8 | 0.039    | 0.036 | 1.061                   | 0.288   |
| SOCDESENV4 | -0.161   | 0.034 | -4.791                  | 0.000   |
| COVWORRY2  | 0.016    | 0.036 | 0.458                   | 0.647   |
| OUTDOOR    | -0.005   | 0.032 | -0.168                  | 0.866   |
| CHANGEOP   | -0.076   | 0.037 | -2.030                  | 0.042   |

|             |        |       |        |       |
|-------------|--------|-------|--------|-------|
| INTEROTH ON |        |       |        |       |
| MEAS_OTH8   | 0.063  | 0.044 | 1.444  | 0.149 |
| MEAS_SELF4  | -0.040 | 0.045 | -0.896 | 0.370 |
| DISTCOV3    | -0.114 | 0.032 | -3.620 | 0.000 |
| HYPCOVID1   | 0.039  | 0.032 | 1.227  | 0.220 |
| AGE         | -0.004 | 0.035 | -0.116 | 0.908 |
| MALE        | 0.073  | 0.031 | 2.374  | 0.018 |
| CH_FR       | -0.144 | 0.036 | -3.937 | 0.000 |
| CH_ESP      | -0.112 | 0.035 | -3.164 | 0.002 |
| CH_UK       | 0.011  | 0.038 | 0.292  | 0.770 |
| SYMPERS2    | -0.067 | 0.031 | -2.163 | 0.031 |
| SYMPOTHER2  | 0.067  | 0.031 | 2.159  | 0.031 |

|            |        |       |        |       |
|------------|--------|-------|--------|-------|
| CONSERV6   | 0.072  | 0.038 | 1.887  | 0.059 |
| UNI4       | 0.055  | 0.036 | 1.536  | 0.125 |
| BENEV2     | 0.208  | 0.034 | 6.200  | 0.000 |
| SOCDESGEN8 | 0.034  | 0.034 | 0.989  | 0.323 |
| SOCDESENV4 | -0.032 | 0.032 | -0.990 | 0.322 |
| COVWORRY2  | 0.253  | 0.033 | 7.760  | 0.000 |
| OUTDOOR    | 0.062  | 0.030 | 2.049  | 0.040 |
| CHANGEOP   | 0.063  | 0.033 | 1.885  | 0.059 |

#### DISTCLIM ON

|            |        |       |        |       |
|------------|--------|-------|--------|-------|
| MEAS_OTH8  | 0.149  | 0.038 | 3.900  | 0.000 |
| MEAS_SELF4 | -0.087 | 0.039 | -2.217 | 0.027 |
| DISTCOV3   | 0.158  | 0.028 | 5.743  | 0.000 |
| HYPCOVID1  | 0.104  | 0.027 | 3.783  | 0.000 |
| AGE        | -0.055 | 0.031 | -1.782 | 0.075 |
| MALE       | -0.036 | 0.027 | -1.332 | 0.183 |
| CH_FR      | 0.008  | 0.032 | 0.261  | 0.794 |
| CH_ESP     | 0.033  | 0.031 | 1.051  | 0.293 |
| CH_UK      | 0.051  | 0.033 | 1.555  | 0.120 |
| SYMPERS2   | -0.007 | 0.027 | -0.258 | 0.796 |
| SYMPOTHER2 | -0.031 | 0.027 | -1.130 | 0.258 |
| CONSERV6   | -0.093 | 0.033 | -2.779 | 0.005 |
| UNI4       | 0.342  | 0.030 | 11.237 | 0.000 |
| BENEV2     | -0.063 | 0.030 | -2.111 | 0.035 |
| SOCDESGEN8 | -0.157 | 0.030 | -5.259 | 0.000 |
| SOCDESENV4 | 0.071  | 0.028 | 2.533  | 0.011 |
| COVWORRY2  | -0.035 | 0.029 | -1.206 | 0.228 |
| OUTDOOR    | 0.010  | 0.026 | 0.375  | 0.707 |
| CHANGEOP   | 0.332  | 0.029 | 11.578 | 0.000 |

#### MEAS\_OTH ON

|            |        |       |        |       |
|------------|--------|-------|--------|-------|
| AGE        | 0.063  | 0.033 | 1.913  | 0.056 |
| MALE       | -0.062 | 0.030 | -2.096 | 0.036 |
| CH_FR      | -0.040 | 0.036 | -1.138 | 0.255 |
| CH_ESP     | -0.076 | 0.034 | -2.220 | 0.026 |
| CH_UK      | 0.000  | 0.036 | -0.005 | 0.996 |
| SYMPERS2   | 0.051  | 0.030 | 1.707  | 0.088 |
| SYMPOTHER2 | 0.092  | 0.030 | 3.080  | 0.002 |
| CONSERV6   | 0.385  | 0.032 | 11.857 | 0.000 |
| UNI4       | 0.081  | 0.033 | 2.494  | 0.013 |
| BENEV2     | 0.042  | 0.033 | 1.285  | 0.199 |
| SOCDESGEN8 | -0.076 | 0.032 | -2.390 | 0.017 |
| COVWORRY2  | 0.156  | 0.030 | 5.119  | 0.000 |
| OUTDOOR    | -0.029 | 0.029 | -0.992 | 0.321 |

#### MEAS\_SEL ON

|        |        |       |        |       |
|--------|--------|-------|--------|-------|
| AGE    | 0.212  | 0.032 | 6.721  | 0.000 |
| MALE   | -0.077 | 0.029 | -2.690 | 0.007 |
| CH_FR  | -0.033 | 0.034 | -0.954 | 0.340 |
| CH_ESP | -0.074 | 0.033 | -2.232 | 0.026 |

|            |        |       |        |       |
|------------|--------|-------|--------|-------|
| CH_UK      | -0.006 | 0.035 | -0.186 | 0.853 |
| SYMPERS2   | -0.006 | 0.029 | -0.219 | 0.826 |
| SYMPOTHER2 | 0.011  | 0.029 | 0.391  | 0.696 |
| CONSERV6   | 0.403  | 0.031 | 12.950 | 0.000 |
| UNI4       | 0.008  | 0.031 | 0.244  | 0.808 |
| BENEV2     | 0.049  | 0.032 | 1.539  | 0.124 |
| SOCDESGEN8 | 0.001  | 0.030 | 0.026  | 0.979 |
| COVWORRY2  | 0.159  | 0.029 | 5.406  | 0.000 |
| OUTDOOR    | -0.018 | 0.028 | -0.625 | 0.532 |

#### DISTCOV3 ON

|            |        |       |        |       |
|------------|--------|-------|--------|-------|
| AGE        | 0.033  | 0.036 | 0.927  | 0.354 |
| MALE       | 0.006  | 0.032 | 0.175  | 0.861 |
| CH_FR      | 0.073  | 0.038 | 1.911  | 0.056 |
| CH_ESP     | 0.070  | 0.037 | 1.889  | 0.059 |
| CH_UK      | 0.207  | 0.039 | 5.340  | 0.000 |
| SYMPERS2   | 0.064  | 0.032 | 1.987  | 0.047 |
| SYMPOTHER2 | 0.069  | 0.032 | 2.139  | 0.032 |
| CONSERV6   | 0.032  | 0.037 | 0.857  | 0.391 |
| UNI4       | 0.061  | 0.035 | 1.739  | 0.082 |
| BENEV2     | 0.037  | 0.036 | 1.048  | 0.295 |
| SOCDESGEN8 | -0.138 | 0.034 | -4.062 | 0.000 |
| COVWORRY2  | 0.208  | 0.033 | 6.366  | 0.000 |
| OUTDOOR    | 0.037  | 0.032 | 1.153  | 0.249 |

#### HYPCOVID ON

|            |        |       |        |       |
|------------|--------|-------|--------|-------|
| AGE        | -0.070 | 0.036 | -1.922 | 0.055 |
| MALE       | 0.040  | 0.032 | 1.240  | 0.215 |
| CH_FR      | -0.051 | 0.039 | -1.303 | 0.192 |
| CH_ESP     | -0.013 | 0.037 | -0.358 | 0.721 |
| CH_UK      | 0.158  | 0.039 | 4.002  | 0.000 |
| SYMPERS2   | -0.026 | 0.033 | -0.811 | 0.417 |
| SYMPOTHER2 | 0.051  | 0.033 | 1.555  | 0.120 |
| CONSERV6   | 0.145  | 0.037 | 3.910  | 0.000 |
| UNI4       | 0.039  | 0.036 | 1.099  | 0.272 |
| BENEV2     | 0.002  | 0.036 | 0.044  | 0.965 |
| SOCDESGEN8 | 0.035  | 0.035 | 1.007  | 0.314 |
| COVWORRY2  | 0.233  | 0.033 | 7.113  | 0.000 |
| OUTDOOR    | 0.023  | 0.032 | 0.715  | 0.474 |

#### CHANGEOP ON

|            |        |       |        |       |
|------------|--------|-------|--------|-------|
| AGE        | -0.005 | 0.035 | -0.152 | 0.880 |
| MALE       | -0.095 | 0.031 | -3.065 | 0.002 |
| CH_FR      | 0.073  | 0.037 | 1.961  | 0.050 |
| CH_ESP     | 0.079  | 0.036 | 2.183  | 0.029 |
| CH_UK      | -0.049 | 0.038 | -1.303 | 0.193 |
| SYMPERS2   | 0.005  | 0.032 | 0.145  | 0.885 |
| SYMPOTHER2 | -0.068 | 0.031 | -2.172 | 0.030 |
| CONSERV6   | 0.035  | 0.036 | 0.971  | 0.332 |
| UNI4       | 0.350  | 0.033 | 10.682 | 0.000 |

|            |        |       |        |       |
|------------|--------|-------|--------|-------|
| BENEV2     | -0.076 | 0.035 | -2.184 | 0.029 |
| SOCDESGEN8 | 0.010  | 0.033 | 0.309  | 0.757 |
| COVWORRY2  | 0.122  | 0.032 | 3.797  | 0.000 |
| OUTDOOR    | -0.034 | 0.031 | -1.105 | 0.269 |

#### MEAS\_OTH WITH

|            |       |       |        |       |
|------------|-------|-------|--------|-------|
| MEAS_SELF4 | 0.615 | 0.021 | 29.759 | 0.000 |
|------------|-------|-------|--------|-------|

#### STANDARDIZED TOTAL, TOTAL INDIRECT, SPECIFIC INDIRECT, AND DIRECT EFFECTS

#### STDYX Standardization

|                                | Estimate | S.E.  | Two-Tailed<br>Est./S.E. | P-Value |
|--------------------------------|----------|-------|-------------------------|---------|
| Effects from MEAS_OTH to PBCL2 |          |       |                         |         |
| Total                          | -0.043   | 0.046 | -0.944                  | 0.345   |
| Total indirect                 | -0.009   | 0.007 | -1.287                  | 0.198   |
| Specific indirect 1            |          |       |                         |         |
| PBCL2                          |          |       |                         |         |
| DISTCLIM                       |          |       |                         |         |
| MEAS_OTH                       | -0.010   | 0.006 | -1.509                  | 0.131   |
| Specific indirect 2            |          |       |                         |         |
| PBCL2                          |          |       |                         |         |
| INTEROTH                       |          |       |                         |         |
| MEAS_OTH                       | 0.001    | 0.002 | 0.440                   | 0.660   |
| Direct                         |          |       |                         |         |
| PBCL2                          |          |       |                         |         |
| MEAS_OTH                       | -0.035   | 0.046 | -0.748                  | 0.455   |

#### Effects from MEAS\_SEL to PBCL2

|                     |       |       |       |       |
|---------------------|-------|-------|-------|-------|
| Total               | 0.093 | 0.047 | 1.977 | 0.048 |
| Total indirect      | 0.005 | 0.005 | 1.105 | 0.269 |
| Specific indirect 1 |       |       |       |       |
| PBCL2               |       |       |       |       |
| DISTCLIM            |       |       |       |       |
| MEAS_SEL            | 0.006 | 0.004 | 1.316 | 0.188 |
| Specific indirect 2 |       |       |       |       |
| PBCL2               |       |       |       |       |
| INTEROTH            |       |       |       |       |

|          |        |       |        |       |
|----------|--------|-------|--------|-------|
| MEAS_SEL | -0.001 | 0.002 | -0.411 | 0.681 |
| Direct   |        |       |        |       |
| PBCL2    |        |       |        |       |
| MEAS_SEL | 0.088  | 0.047 | 1.867  | 0.062 |

#### Effects from DISTCOV3 to PBCL2

|                |        |       |        |       |
|----------------|--------|-------|--------|-------|
| Total          | -0.036 | 0.033 | -1.091 | 0.275 |
| Total indirect | -0.012 | 0.008 | -1.555 | 0.120 |

#### Specific indirect 1

|          |        |       |        |       |
|----------|--------|-------|--------|-------|
| PBCL2    |        |       |        |       |
| DISTCLIM |        |       |        |       |
| DISTCOV3 | -0.010 | 0.007 | -1.573 | 0.116 |

#### Specific indirect 2

|          |        |       |        |       |
|----------|--------|-------|--------|-------|
| PBCL2    |        |       |        |       |
| INTEROTH |        |       |        |       |
| DISTCOV3 | -0.002 | 0.004 | -0.458 | 0.647 |

#### Direct

|          |        |       |        |       |
|----------|--------|-------|--------|-------|
| PBCL2    |        |       |        |       |
| DISTCOV3 | -0.024 | 0.034 | -0.707 | 0.480 |

#### Effects from HYPCOVID to PBCL2

|                |        |       |        |       |
|----------------|--------|-------|--------|-------|
| Total          | 0.027  | 0.033 | 0.821  | 0.412 |
| Total indirect | -0.006 | 0.005 | -1.313 | 0.189 |

#### Specific indirect 1

|          |        |       |        |       |
|----------|--------|-------|--------|-------|
| PBCL2    |        |       |        |       |
| DISTCLIM |        |       |        |       |
| HYPCOVID | -0.007 | 0.005 | -1.501 | 0.133 |

#### Specific indirect 2

|          |       |       |       |       |
|----------|-------|-------|-------|-------|
| PBCL2    |       |       |       |       |
| INTEROTH |       |       |       |       |
| HYPCOVID | 0.001 | 0.001 | 0.433 | 0.665 |

#### Direct

|          |       |       |       |       |
|----------|-------|-------|-------|-------|
| PBCL2    |       |       |       |       |
| HYPCOVID | 0.033 | 0.033 | 1.001 | 0.317 |

### CONFIDENCE INTERVALS OF STANDARDIZED MODEL RESULTS

#### STDYX Standardization



Lower .5% Lower 2.5% Lower 5% Estimate Upper 5% Upper 2.5% Upper .5%

PBCL2 ON

|            |        |        |        |        |        |        |        |
|------------|--------|--------|--------|--------|--------|--------|--------|
| INTEROTH6  | -0.073 | -0.052 | -0.041 | 0.016  | 0.073  | 0.084  | 0.106  |
| DISTCLIM6  | -0.168 | -0.144 | -0.131 | -0.065 | 0.000  | 0.013  | 0.038  |
| MEAS_OTH8  | -0.154 | -0.125 | -0.111 | -0.035 | 0.041  | 0.056  | 0.084  |
| MEAS_SELF4 | -0.033 | -0.004 | 0.010  | 0.088  | 0.165  | 0.180  | 0.209  |
| DISTCOV3   | -0.112 | -0.091 | -0.080 | -0.024 | 0.032  | 0.043  | 0.064  |
| HYPCOVID1  | -0.052 | -0.032 | -0.021 | 0.033  | 0.088  | 0.098  | 0.119  |
| AGE        | -0.011 | 0.012  | 0.024  | 0.085  | 0.145  | 0.157  | 0.180  |
| MALE       | -0.095 | -0.075 | -0.065 | -0.012 | 0.041  | 0.051  | 0.071  |
| CH_FR      | -0.162 | -0.139 | -0.126 | -0.063 | 0.001  | 0.013  | 0.037  |
| CH_ESP     | -0.153 | -0.130 | -0.118 | -0.057 | 0.005  | 0.017  | 0.040  |
| CH_UK      | -0.208 | -0.184 | -0.171 | -0.106 | -0.040 | -0.028 | -0.003 |
| SYMPERS2   | -0.100 | -0.080 | -0.070 | -0.017 | 0.037  | 0.047  | 0.067  |
| SYMPOTHER2 | -0.095 | -0.075 | -0.064 | -0.010 | 0.044  | 0.054  | 0.074  |
| CONSERV6   | 0.064  | 0.089  | 0.101  | 0.167  | 0.233  | 0.246  | 0.271  |
| UNI4       | -0.314 | -0.290 | -0.277 | -0.212 | -0.147 | -0.134 | -0.110 |
| BENEV2     | -0.084 | -0.062 | -0.051 | 0.009  | 0.069  | 0.081  | 0.103  |
| SOCDESGEN8 | -0.055 | -0.033 | -0.021 | 0.039  | 0.099  | 0.110  | 0.133  |
| SOCDESENV4 | -0.248 | -0.227 | -0.216 | -0.161 | -0.106 | -0.095 | -0.074 |
| COVWORRY2  | -0.076 | -0.054 | -0.043 | 0.016  | 0.076  | 0.087  | 0.109  |
| OUTDOOR    | -0.087 | -0.067 | -0.057 | -0.005 | 0.047  | 0.057  | 0.076  |
| CHANGEOP   | -0.172 | -0.149 | -0.137 | -0.076 | -0.014 | -0.003 | 0.020  |

INTEROTH ON

|            |        |        |        |        |        |        |        |
|------------|--------|--------|--------|--------|--------|--------|--------|
| MEAS_OTH8  | -0.049 | -0.023 | -0.009 | 0.063  | 0.135  | 0.149  | 0.176  |
| MEAS_SELF4 | -0.156 | -0.128 | -0.114 | -0.040 | 0.034  | 0.048  | 0.076  |
| DISTCOV3   | -0.196 | -0.176 | -0.166 | -0.114 | -0.062 | -0.052 | -0.033 |
| HYPCOVID1  | -0.043 | -0.023 | -0.013 | 0.039  | 0.090  | 0.100  | 0.120  |
| AGE        | -0.095 | -0.073 | -0.062 | -0.004 | 0.054  | 0.065  | 0.087  |
| MALE       | -0.006 | 0.013  | 0.022  | 0.073  | 0.124  | 0.133  | 0.152  |
| CH_FR      | -0.238 | -0.215 | -0.204 | -0.144 | -0.084 | -0.072 | -0.050 |
| CH_ESP     | -0.204 | -0.182 | -0.171 | -0.112 | -0.054 | -0.043 | -0.021 |
| CH_UK      | -0.087 | -0.063 | -0.052 | 0.011  | 0.074  | 0.086  | 0.109  |
| SYMPERS2   | -0.146 | -0.127 | -0.118 | -0.067 | -0.016 | -0.006 | 0.013  |
| SYMPOTHER2 | -0.013 | 0.006  | 0.016  | 0.067  | 0.119  | 0.129  | 0.148  |
| CONSERV6   | -0.026 | -0.003 | 0.009  | 0.072  | 0.135  | 0.147  | 0.171  |
| UNI4       | -0.037 | -0.015 | -0.004 | 0.055  | 0.114  | 0.126  | 0.148  |
| BENEV2     | 0.122  | 0.142  | 0.153  | 0.208  | 0.264  | 0.274  | 0.295  |
| SOCDESGEN8 | -0.054 | -0.033 | -0.023 | 0.034  | 0.090  | 0.101  | 0.122  |
| SOCDESENV4 | -0.115 | -0.095 | -0.085 | -0.032 | 0.021  | 0.031  | 0.051  |
| COVWORRY2  | 0.169  | 0.189  | 0.200  | 0.253  | 0.307  | 0.317  | 0.338  |
| OUTDOOR    | -0.016 | 0.003  | 0.012  | 0.062  | 0.111  | 0.121  | 0.139  |
| CHANGEOP   | -0.023 | -0.003 | 0.008  | 0.063  | 0.118  | 0.129  | 0.149  |

DISTCLIM ON

|           |       |       |       |       |       |       |       |
|-----------|-------|-------|-------|-------|-------|-------|-------|
| MEAS_OTH8 | 0.051 | 0.074 | 0.086 | 0.149 | 0.212 | 0.224 | 0.248 |
|-----------|-------|-------|-------|-------|-------|-------|-------|

|            |        |        |        |        |        |        |        |
|------------|--------|--------|--------|--------|--------|--------|--------|
| MEAS_SELF4 | -0.187 | -0.163 | -0.151 | -0.087 | -0.022 | -0.010 | 0.014  |
| DISTCOV3   | 0.087  | 0.104  | 0.113  | 0.158  | 0.203  | 0.212  | 0.229  |
| HYPCOVID1  | 0.033  | 0.050  | 0.059  | 0.104  | 0.149  | 0.158  | 0.175  |
| AGE        | -0.134 | -0.115 | -0.105 | -0.055 | -0.004 | 0.005  | 0.024  |
| MALE       | -0.105 | -0.088 | -0.080 | -0.036 | 0.008  | 0.017  | 0.033  |
| CH_FR      | -0.074 | -0.054 | -0.044 | 0.008  | 0.061  | 0.071  | 0.091  |
| CH_ESP     | -0.047 | -0.028 | -0.018 | 0.033  | 0.084  | 0.093  | 0.112  |
| CH_UK      | -0.034 | -0.013 | -0.003 | 0.051  | 0.106  | 0.116  | 0.137  |
| SYMPERS2   | -0.076 | -0.060 | -0.051 | -0.007 | 0.037  | 0.046  | 0.062  |
| SYMPOTHER2 | -0.101 | -0.084 | -0.075 | -0.031 | 0.014  | 0.023  | 0.039  |
| CONSERV6   | -0.179 | -0.159 | -0.148 | -0.093 | -0.038 | -0.027 | -0.007 |
| UNI4       | 0.263  | 0.282  | 0.292  | 0.342  | 0.392  | 0.401  | 0.420  |
| BENEV2     | -0.139 | -0.121 | -0.111 | -0.063 | -0.014 | -0.004 | 0.014  |
| SOCDEGEN8  | -0.233 | -0.215 | -0.206 | -0.157 | -0.108 | -0.098 | -0.080 |
| SOCDESENV4 | -0.001 | 0.016  | 0.025  | 0.071  | 0.117  | 0.126  | 0.144  |
| COVWORRY2  | -0.110 | -0.092 | -0.083 | -0.035 | 0.013  | 0.022  | 0.040  |
| OUTDOOR    | -0.058 | -0.041 | -0.033 | 0.010  | 0.053  | 0.061  | 0.077  |
| CHANGEOP   | 0.258  | 0.276  | 0.285  | 0.332  | 0.379  | 0.389  | 0.406  |

#### MEAS\_OTH ON

|            |        |        |        |        |        |        |       |
|------------|--------|--------|--------|--------|--------|--------|-------|
| AGE        | -0.022 | -0.002 | 0.009  | 0.063  | 0.118  | 0.128  | 0.149 |
| MALE       | -0.139 | -0.121 | -0.111 | -0.062 | -0.013 | -0.004 | 0.014 |
| CH_FR      | -0.132 | -0.110 | -0.099 | -0.040 | 0.018  | 0.029  | 0.051 |
| CH_ESP     | -0.165 | -0.144 | -0.133 | -0.076 | -0.020 | -0.009 | 0.012 |
| CH_UK      | -0.094 | -0.071 | -0.060 | 0.000  | 0.060  | 0.071  | 0.093 |
| SYMPERS2   | -0.026 | -0.008 | 0.002  | 0.051  | 0.101  | 0.110  | 0.128 |
| SYMPOTHER2 | 0.015  | 0.034  | 0.043  | 0.092  | 0.141  | 0.151  | 0.169 |
| CONSERV6   | 0.301  | 0.322  | 0.332  | 0.385  | 0.439  | 0.449  | 0.469 |
| UNI4       | -0.003 | 0.017  | 0.028  | 0.081  | 0.135  | 0.145  | 0.166 |
| BENEV2     | -0.043 | -0.022 | -0.012 | 0.042  | 0.097  | 0.107  | 0.127 |
| SOCDEGEN8  | -0.157 | -0.137 | -0.127 | -0.076 | -0.024 | -0.014 | 0.006 |
| COVWORRY2  | 0.078  | 0.096  | 0.106  | 0.156  | 0.206  | 0.216  | 0.235 |
| OUTDOOR    | -0.105 | -0.087 | -0.077 | -0.029 | 0.019  | 0.028  | 0.046 |

#### MEAS\_SEL ON

|            |        |        |        |        |        |        |        |
|------------|--------|--------|--------|--------|--------|--------|--------|
| AGE        | 0.131  | 0.150  | 0.160  | 0.212  | 0.264  | 0.274  | 0.294  |
| MALE       | -0.151 | -0.133 | -0.124 | -0.077 | -0.030 | -0.021 | -0.003 |
| CH_FR      | -0.121 | -0.100 | -0.089 | -0.033 | 0.024  | 0.034  | 0.055  |
| CH_ESP     | -0.159 | -0.139 | -0.128 | -0.074 | -0.019 | -0.009 | 0.011  |
| CH_UK      | -0.096 | -0.075 | -0.064 | -0.006 | 0.051  | 0.062  | 0.083  |
| SYMPERS2   | -0.081 | -0.063 | -0.054 | -0.006 | 0.041  | 0.050  | 0.068  |
| SYMPOTHER2 | -0.063 | -0.045 | -0.036 | 0.011  | 0.059  | 0.068  | 0.086  |
| CONSERV6   | 0.323  | 0.342  | 0.352  | 0.403  | 0.454  | 0.464  | 0.483  |
| UNI4       | -0.073 | -0.054 | -0.044 | 0.008  | 0.059  | 0.069  | 0.089  |
| BENEV2     | -0.033 | -0.013 | -0.003 | 0.049  | 0.101  | 0.111  | 0.131  |
| SOCDEGEN8  | -0.078 | -0.059 | -0.049 | 0.001  | 0.051  | 0.060  | 0.079  |
| COVWORRY2  | 0.083  | 0.101  | 0.111  | 0.159  | 0.207  | 0.216  | 0.235  |
| OUTDOOR    | -0.090 | -0.073 | -0.064 | -0.018 | 0.029  | 0.038  | 0.055  |

#### DISTCOV3 ON

|            |        |        |        |        |        |        |        |
|------------|--------|--------|--------|--------|--------|--------|--------|
| AGE        | -0.059 | -0.037 | -0.026 | 0.033  | 0.092  | 0.104  | 0.126  |
| MALE       | -0.077 | -0.058 | -0.047 | 0.006  | 0.059  | 0.069  | 0.089  |
| CH_FR      | -0.026 | -0.002 | 0.010  | 0.073  | 0.137  | 0.149  | 0.172  |
| CH_ESP     | -0.026 | -0.003 | 0.009  | 0.070  | 0.131  | 0.143  | 0.166  |
| CH_UK      | 0.107  | 0.131  | 0.143  | 0.207  | 0.271  | 0.283  | 0.307  |
| SYMPERS2   | -0.019 | 0.001  | 0.011  | 0.064  | 0.118  | 0.128  | 0.148  |
| SYMPOTHER2 | -0.014 | 0.006  | 0.016  | 0.069  | 0.123  | 0.133  | 0.153  |
| CONSERV6   | -0.063 | -0.041 | -0.029 | 0.032  | 0.092  | 0.104  | 0.127  |
| UNI4       | -0.030 | -0.008 | 0.003  | 0.061  | 0.120  | 0.131  | 0.153  |
| BENEV2     | -0.055 | -0.033 | -0.021 | 0.037  | 0.096  | 0.108  | 0.130  |
| SOCDEGEN8  | -0.226 | -0.205 | -0.194 | -0.138 | -0.082 | -0.072 | -0.051 |
| COVWORRY2  | 0.124  | 0.144  | 0.154  | 0.208  | 0.262  | 0.272  | 0.293  |
| OUTDOOR    | -0.045 | -0.026 | -0.016 | 0.037  | 0.089  | 0.099  | 0.118  |

#### HYPCOVID ON

|            |        |        |        |        |        |       |       |
|------------|--------|--------|--------|--------|--------|-------|-------|
| AGE        | -0.164 | -0.141 | -0.130 | -0.070 | -0.010 | 0.001 | 0.024 |
| MALE       | -0.043 | -0.023 | -0.013 | 0.040  | 0.094  | 0.104 | 0.124 |
| CH_FR      | -0.151 | -0.127 | -0.115 | -0.051 | 0.013  | 0.026 | 0.049 |
| CH_ESP     | -0.110 | -0.087 | -0.075 | -0.013 | 0.048  | 0.060 | 0.083 |
| CH_UK      | 0.056  | 0.080  | 0.093  | 0.158  | 0.222  | 0.235 | 0.259 |
| SYMPERS2   | -0.111 | -0.091 | -0.080 | -0.026 | 0.027  | 0.038 | 0.058 |
| SYMPOTHER2 | -0.033 | -0.013 | -0.003 | 0.051  | 0.105  | 0.115 | 0.135 |
| CONSERV6   | 0.049  | 0.072  | 0.084  | 0.145  | 0.205  | 0.217 | 0.240 |
| UNI4       | -0.053 | -0.031 | -0.019 | 0.039  | 0.098  | 0.109 | 0.131 |
| BENEV2     | -0.092 | -0.070 | -0.058 | 0.002  | 0.061  | 0.073 | 0.095 |
| SOCDEGEN8  | -0.054 | -0.033 | -0.022 | 0.035  | 0.092  | 0.103 | 0.124 |
| COVWORRY2  | 0.149  | 0.169  | 0.179  | 0.233  | 0.287  | 0.297 | 0.317 |
| OUTDOOR    | -0.060 | -0.040 | -0.030 | 0.023  | 0.076  | 0.086 | 0.105 |

#### CHANGEOP ON

|            |        |        |        |        |        |        |        |
|------------|--------|--------|--------|--------|--------|--------|--------|
| AGE        | -0.095 | -0.074 | -0.063 | -0.005 | 0.052  | 0.063  | 0.085  |
| MALE       | -0.176 | -0.156 | -0.147 | -0.095 | -0.044 | -0.034 | -0.015 |
| CH_FR      | -0.023 | 0.000  | 0.012  | 0.073  | 0.134  | 0.146  | 0.169  |
| CH_ESP     | -0.014 | 0.008  | 0.019  | 0.079  | 0.138  | 0.150  | 0.172  |
| CH_UK      | -0.147 | -0.124 | -0.112 | -0.049 | 0.013  | 0.025  | 0.048  |
| SYMPERS2   | -0.077 | -0.058 | -0.048 | 0.005  | 0.057  | 0.067  | 0.086  |
| SYMPOTHER2 | -0.149 | -0.130 | -0.120 | -0.068 | -0.017 | -0.007 | 0.013  |
| CONSERV6   | -0.058 | -0.035 | -0.024 | 0.035  | 0.094  | 0.105  | 0.127  |
| UNI4       | 0.266  | 0.286  | 0.296  | 0.350  | 0.404  | 0.414  | 0.434  |
| BENEV2     | -0.166 | -0.145 | -0.134 | -0.076 | -0.019 | -0.008 | 0.014  |
| SOCDEGEN8  | -0.075 | -0.055 | -0.044 | 0.010  | 0.065  | 0.075  | 0.096  |
| COVWORRY2  | 0.039  | 0.059  | 0.069  | 0.122  | 0.174  | 0.184  | 0.204  |
| OUTDOOR    | -0.113 | -0.094 | -0.084 | -0.034 | 0.017  | 0.026  | 0.045  |

#### MEAS\_OTH WITH

|            |       |       |       |       |       |       |       |
|------------|-------|-------|-------|-------|-------|-------|-------|
| MEAS_SELF4 | 0.562 | 0.574 | 0.581 | 0.615 | 0.649 | 0.655 | 0.668 |
|------------|-------|-------|-------|-------|-------|-------|-------|

ONFIDENCE INTERVALS OF STANDARDIZED TOTAL, TOTAL INDIRECT,  
SPECIFIC INDIRECT, AND DIRECT EFFECTS

## STDYX Standardization

|  | Lower .5% | Lower 2.5% | Lower 5% | Estimate | Upper 5% | Upper 2.5% | Upper .5% |
|--|-----------|------------|----------|----------|----------|------------|-----------|
|--|-----------|------------|----------|----------|----------|------------|-----------|

### Effects from MEAS\_OTH to PBCL2

|                     |        |        |        |        |       |       |       |
|---------------------|--------|--------|--------|--------|-------|-------|-------|
| Total               | -0.161 | -0.133 | -0.119 | -0.043 | 0.032 | 0.047 | 0.075 |
| Total indirect      | -0.026 | -0.022 | -0.020 | -0.009 | 0.002 | 0.005 | 0.009 |
| Specific indirect 1 |        |        |        |        |       |       |       |
| PBCL2               |        |        |        |        |       |       |       |
| DISTCLIM            |        |        |        |        |       |       |       |
| MEAS_OTH            | -0.026 | -0.022 | -0.020 | -0.010 | 0.001 | 0.003 | 0.007 |
| Specific indirect 2 |        |        |        |        |       |       |       |
| PBCL2               |        |        |        |        |       |       |       |
| INTEROTH            |        |        |        |        |       |       |       |
| MEAS_OTH            | -0.005 | -0.004 | -0.003 | 0.001  | 0.005 | 0.006 | 0.007 |
| Direct              |        |        |        |        |       |       |       |
| PBCL2               |        |        |        |        |       |       |       |
| MEAS_OTH            | -0.154 | -0.125 | -0.111 | -0.035 | 0.041 | 0.056 | 0.084 |

### Effects from MEAS\_SEL to PBCL2

|                     |        |        |        |        |       |       |       |
|---------------------|--------|--------|--------|--------|-------|-------|-------|
| Total               | -0.028 | 0.001  | 0.016  | 0.093  | 0.170 | 0.185 | 0.214 |
| Total indirect      | -0.007 | -0.004 | -0.002 | 0.005  | 0.012 | 0.014 | 0.017 |
| Specific indirect 1 |        |        |        |        |       |       |       |
| PBCL2               |        |        |        |        |       |       |       |
| DISTCLIM            |        |        |        |        |       |       |       |
| MEAS_SEL            | -0.005 | -0.003 | -0.001 | 0.006  | 0.013 | 0.014 | 0.017 |
| Specific indirect 2 |        |        |        |        |       |       |       |
| PBCL2               |        |        |        |        |       |       |       |
| INTEROTH            |        |        |        |        |       |       |       |
| MEAS_SEL            | -0.005 | -0.004 | -0.003 | -0.001 | 0.002 | 0.002 | 0.003 |
| Direct              |        |        |        |        |       |       |       |
| PBCL2               |        |        |        |        |       |       |       |
| MEAS_SEL            | -0.033 | -0.004 | 0.010  | 0.088  | 0.165 | 0.180 | 0.209 |

### Effects from DISTCOV3 to PBCL2

|       |        |        |        |        |       |       |       |
|-------|--------|--------|--------|--------|-------|-------|-------|
| Total | -0.122 | -0.101 | -0.091 | -0.036 | 0.018 | 0.029 | 0.049 |
|-------|--------|--------|--------|--------|-------|-------|-------|

|                     |        |        |        |        |       |       |       |
|---------------------|--------|--------|--------|--------|-------|-------|-------|
| Total indirect      | -0.032 | -0.027 | -0.025 | -0.012 | 0.001 | 0.003 | 0.008 |
| Specific indirect 1 |        |        |        |        |       |       |       |
| PBCL2               |        |        |        |        |       |       |       |
| DISTCLIM            |        |        |        |        |       |       |       |
| DISTCOV3            | -0.027 | -0.023 | -0.021 | -0.010 | 0.000 | 0.003 | 0.007 |
| Specific indirect 2 |        |        |        |        |       |       |       |
| PBCL2               |        |        |        |        |       |       |       |
| INTEROTH            |        |        |        |        |       |       |       |
| DISTCOV3            | -0.012 | -0.010 | -0.008 | -0.002 | 0.005 | 0.006 | 0.008 |
| Direct              |        |        |        |        |       |       |       |
| PBCL2               |        |        |        |        |       |       |       |
| DISTCOV3            | -0.112 | -0.091 | -0.080 | -0.024 | 0.032 | 0.043 | 0.064 |

#### Effects from HYPCOVID to PBCL2

|                     |        |        |        |        |       |       |       |
|---------------------|--------|--------|--------|--------|-------|-------|-------|
| Total               | -0.058 | -0.038 | -0.027 | 0.027  | 0.081 | 0.092 | 0.112 |
| Total indirect      | -0.018 | -0.015 | -0.014 | -0.006 | 0.002 | 0.003 | 0.006 |
| Specific indirect 1 |        |        |        |        |       |       |       |
| PBCL2               |        |        |        |        |       |       |       |
| DISTCLIM            |        |        |        |        |       |       |       |
| HYPCOVID            | -0.018 | -0.016 | -0.014 | -0.007 | 0.001 | 0.002 | 0.005 |
| Specific indirect 2 |        |        |        |        |       |       |       |
| PBCL2               |        |        |        |        |       |       |       |
| INTEROTH            |        |        |        |        |       |       |       |
| HYPCOVID            | -0.003 | -0.002 | -0.002 | 0.001  | 0.003 | 0.003 | 0.004 |
| Direct              |        |        |        |        |       |       |       |
| PBCL2               |        |        |        |        |       |       |       |
| HYPCOVID            | -0.052 | -0.032 | -0.021 | 0.033  | 0.088 | 0.098 | 0.119 |

#### Predicting Class 3: the committed to private behaviours

THE MODEL ESTIMATION TERMINATED NORMALLY

#### MODEL FIT INFORMATION

Number of Free Parameters 141

#### Loglikelihood

|          |           |
|----------|-----------|
| H0 Value | -8593.580 |
| H1 Value | -8559.583 |

### Information Criteria

|                          |           |
|--------------------------|-----------|
| Akaike (AIC)             | 17469.160 |
| Bayesian (BIC)           | 18147.390 |
| Sample-Size Adjusted BIC | 17699.595 |
| (n* = (n + 2) / 24)      |           |

### Chi-Square Test of Model Fit

|                    |        |
|--------------------|--------|
| Value              | 67.994 |
| Degrees of Freedom | 15     |
| P-Value            | 0.0000 |

### RMSEA (Root Mean Square Error Of Approximation)

|                          |             |
|--------------------------|-------------|
| Estimate                 | 0.062       |
| 90 Percent C.I.          | 0.048 0.078 |
| Probability RMSEA <= .05 | 0.079       |

### CFI/TLI

|     |       |
|-----|-------|
| CFI | 0.976 |
| TLI | 0.775 |

### Chi-Square Test of Model Fit for the Baseline Model

|                    |          |
|--------------------|----------|
| Value              | 2339.421 |
| Degrees of Freedom | 140      |
| P-Value            | 0.0000   |

### SRMR (Standardized Root Mean Square Residual)

|       |       |
|-------|-------|
| Value | 0.023 |
|-------|-------|

### STANDARDIZED MODEL RESULTS

#### STDYX Standardization

|            |          | Two-Tailed |           |         |
|------------|----------|------------|-----------|---------|
|            | Estimate | S.E.       | Est./S.E. | P-Value |
| PBCL3 ON   |          |            |           |         |
| INTEROTH6  | -0.101   | 0.036      | -2.798    | 0.005   |
| DISTCLIM6  | 0.038    | 0.042      | 0.905     | 0.365   |
| MEAS_OTH8  | 0.072    | 0.048      | 1.508     | 0.132   |
| MEAS_SELF4 | -0.036   | 0.049      | -0.728    | 0.467   |
| DISTCOV3   | 0.023    | 0.035      | 0.663     | 0.508   |

|            |        |       |        |       |
|------------|--------|-------|--------|-------|
| HYPCOVID1  | 0.030  | 0.035 | 0.881  | 0.379 |
| AGE        | -0.071 | 0.038 | -1.854 | 0.064 |
| MALE       | -0.008 | 0.034 | -0.243 | 0.808 |
| CH_FR      | 0.023  | 0.040 | 0.576  | 0.564 |
| CH_ESP     | -0.127 | 0.039 | -3.262 | 0.001 |
| CH_UK      | -0.160 | 0.041 | -3.886 | 0.000 |
| SYMPERS2   | -0.056 | 0.034 | -1.672 | 0.094 |
| SYMPOTHER2 | -0.021 | 0.034 | -0.611 | 0.541 |
| CONSERV6   | 0.068  | 0.042 | 1.616  | 0.106 |
| UNI4       | 0.022  | 0.042 | 0.519  | 0.604 |
| BENEV2     | 0.014  | 0.038 | 0.360  | 0.719 |
| SOCDESGEN8 | 0.043  | 0.038 | 1.132  | 0.257 |
| SOCDESENV4 | 0.005  | 0.035 | 0.138  | 0.890 |
| COVWORRY2  | -0.072 | 0.037 | -1.936 | 0.053 |
| OUTDOOR    | -0.037 | 0.033 | -1.139 | 0.255 |
| CHANGEOP   | -0.056 | 0.039 | -1.427 | 0.154 |

#### INTEROTH ON

|            |        |       |        |       |
|------------|--------|-------|--------|-------|
| MEAS_OTH8  | 0.063  | 0.044 | 1.446  | 0.148 |
| MEAS_SELF4 | -0.040 | 0.045 | -0.897 | 0.370 |
| DISTCOV3   | -0.114 | 0.032 | -3.621 | 0.000 |
| HYPCOVID1  | 0.039  | 0.032 | 1.224  | 0.221 |
| AGE        | -0.004 | 0.035 | -0.117 | 0.907 |
| MALE       | 0.073  | 0.031 | 2.374  | 0.018 |
| CH_FR      | -0.144 | 0.036 | -3.937 | 0.000 |
| CH_ESP     | -0.112 | 0.035 | -3.163 | 0.002 |
| CH_UK      | 0.011  | 0.038 | 0.293  | 0.769 |
| SYMPERS2   | -0.067 | 0.031 | -2.163 | 0.031 |
| SYMPOTHER2 | 0.067  | 0.031 | 2.159  | 0.031 |
| CONSERV6   | 0.072  | 0.038 | 1.887  | 0.059 |
| UNI4       | 0.055  | 0.036 | 1.537  | 0.124 |
| BENEV2     | 0.208  | 0.034 | 6.201  | 0.000 |
| SOCDESGEN8 | 0.034  | 0.034 | 0.989  | 0.323 |
| SOCDESENV4 | -0.032 | 0.032 | -0.990 | 0.322 |
| COVWORRY2  | 0.253  | 0.033 | 7.760  | 0.000 |
| OUTDOOR    | 0.062  | 0.030 | 2.050  | 0.040 |
| CHANGEOP   | 0.063  | 0.033 | 1.886  | 0.059 |

#### DISTCLIM ON

|            |        |       |        |       |
|------------|--------|-------|--------|-------|
| MEAS_OTH8  | 0.149  | 0.038 | 3.906  | 0.000 |
| MEAS_SELF4 | -0.087 | 0.039 | -2.224 | 0.026 |
| DISTCOV3   | 0.158  | 0.028 | 5.742  | 0.000 |
| HYPCOVID1  | 0.104  | 0.027 | 3.780  | 0.000 |
| AGE        | -0.055 | 0.031 | -1.788 | 0.074 |
| MALE       | -0.036 | 0.027 | -1.332 | 0.183 |
| CH_FR      | 0.008  | 0.032 | 0.264  | 0.792 |
| CH_ESP     | 0.033  | 0.031 | 1.053  | 0.292 |
| CH_UK      | 0.052  | 0.033 | 1.558  | 0.119 |
| SYMPERS2   | -0.007 | 0.027 | -0.252 | 0.801 |
| SYMPOTHER2 | -0.031 | 0.027 | -1.134 | 0.257 |

|            |        |       |        |       |
|------------|--------|-------|--------|-------|
| CONSERV6   | -0.093 | 0.033 | -2.782 | 0.005 |
| UNI4       | 0.342  | 0.030 | 11.242 | 0.000 |
| BENEV2     | -0.063 | 0.030 | -2.110 | 0.035 |
| SOCDESGEN8 | -0.157 | 0.030 | -5.260 | 0.000 |
| SOCDESENV4 | 0.071  | 0.028 | 2.531  | 0.011 |
| COVWORRY2  | -0.035 | 0.029 | -1.210 | 0.226 |
| OUTDOOR    | 0.010  | 0.026 | 0.380  | 0.704 |
| CHANGEOP   | 0.333  | 0.029 | 11.604 | 0.000 |

#### MEAS\_OTH ON

|            |        |       |        |       |
|------------|--------|-------|--------|-------|
| AGE        | 0.063  | 0.033 | 1.913  | 0.056 |
| MALE       | -0.062 | 0.030 | -2.095 | 0.036 |
| CH_FR      | -0.040 | 0.036 | -1.138 | 0.255 |
| CH_ESP     | -0.076 | 0.034 | -2.221 | 0.026 |
| CH_UK      | 0.000  | 0.036 | -0.007 | 0.995 |
| SYMPERS2   | 0.051  | 0.030 | 1.707  | 0.088 |
| SYMPOTHER2 | 0.092  | 0.030 | 3.081  | 0.002 |
| CONSERV6   | 0.385  | 0.032 | 11.856 | 0.000 |
| UNI4       | 0.082  | 0.033 | 2.497  | 0.013 |
| BENEV2     | 0.042  | 0.033 | 1.284  | 0.199 |
| SOCDESGEN8 | -0.075 | 0.032 | -2.389 | 0.017 |
| COVWORRY2  | 0.156  | 0.030 | 5.120  | 0.000 |
| OUTDOOR    | -0.029 | 0.029 | -0.992 | 0.321 |

#### MEAS\_SEL ON

|            |        |       |        |       |
|------------|--------|-------|--------|-------|
| AGE        | 0.212  | 0.032 | 6.721  | 0.000 |
| MALE       | -0.077 | 0.029 | -2.690 | 0.007 |
| CH_FR      | -0.033 | 0.034 | -0.954 | 0.340 |
| CH_ESP     | -0.074 | 0.033 | -2.232 | 0.026 |
| CH_UK      | -0.006 | 0.035 | -0.186 | 0.853 |
| SYMPERS2   | -0.006 | 0.029 | -0.219 | 0.826 |
| SYMPOTHER2 | 0.011  | 0.029 | 0.391  | 0.696 |
| CONSERV6   | 0.403  | 0.031 | 12.950 | 0.000 |
| UNI4       | 0.008  | 0.031 | 0.244  | 0.808 |
| BENEV2     | 0.049  | 0.032 | 1.539  | 0.124 |
| SOCDESGEN8 | 0.001  | 0.030 | 0.026  | 0.979 |
| COVWORRY2  | 0.159  | 0.029 | 5.406  | 0.000 |
| OUTDOOR    | -0.018 | 0.028 | -0.625 | 0.532 |

#### DISTCOV3 ON

|            |       |       |       |       |
|------------|-------|-------|-------|-------|
| AGE        | 0.033 | 0.036 | 0.927 | 0.354 |
| MALE       | 0.006 | 0.032 | 0.175 | 0.861 |
| CH_FR      | 0.073 | 0.038 | 1.911 | 0.056 |
| CH_ESP     | 0.070 | 0.037 | 1.889 | 0.059 |
| CH_UK      | 0.207 | 0.039 | 5.340 | 0.000 |
| SYMPERS2   | 0.064 | 0.032 | 1.987 | 0.047 |
| SYMPOTHER2 | 0.069 | 0.032 | 2.139 | 0.032 |
| CONSERV6   | 0.032 | 0.037 | 0.857 | 0.391 |
| UNI4       | 0.061 | 0.035 | 1.739 | 0.082 |
| BENEV2     | 0.037 | 0.036 | 1.048 | 0.295 |



|            |        |       |        |       |
|------------|--------|-------|--------|-------|
| SOCDESGEN8 | -0.138 | 0.034 | -4.062 | 0.000 |
| COVWORRY2  | 0.208  | 0.033 | 6.366  | 0.000 |
| OUTDOOR    | 0.037  | 0.032 | 1.153  | 0.249 |

#### HYPCOVID ON

|            |        |       |        |       |
|------------|--------|-------|--------|-------|
| AGE        | -0.070 | 0.036 | -1.913 | 0.056 |
| MALE       | 0.040  | 0.032 | 1.239  | 0.215 |
| CH_FR      | -0.051 | 0.039 | -1.309 | 0.190 |
| CH_ESP     | -0.014 | 0.037 | -0.361 | 0.718 |
| CH_UK      | 0.157  | 0.039 | 3.998  | 0.000 |
| SYMPERS2   | -0.027 | 0.033 | -0.812 | 0.417 |
| SYMPOTHER2 | 0.051  | 0.033 | 1.559  | 0.119 |
| CONSERV6   | 0.145  | 0.037 | 3.915  | 0.000 |
| UNI4       | 0.039  | 0.036 | 1.092  | 0.275 |
| BENEV2     | 0.001  | 0.036 | 0.037  | 0.970 |
| SOCDESGEN8 | 0.035  | 0.035 | 1.001  | 0.317 |
| COVWORRY2  | 0.233  | 0.033 | 7.115  | 0.000 |
| OUTDOOR    | 0.023  | 0.032 | 0.710  | 0.478 |

#### CHANGEOP ON

|            |        |       |        |       |
|------------|--------|-------|--------|-------|
| AGE        | -0.005 | 0.035 | -0.136 | 0.892 |
| MALE       | -0.095 | 0.031 | -3.060 | 0.002 |
| CH_FR      | 0.073  | 0.037 | 1.952  | 0.051 |
| CH_ESP     | 0.079  | 0.036 | 2.176  | 0.030 |
| CH_UK      | -0.049 | 0.038 | -1.304 | 0.192 |
| SYMPERS2   | 0.004  | 0.032 | 0.129  | 0.898 |
| SYMPOTHER2 | -0.068 | 0.031 | -2.163 | 0.031 |
| CONSERV6   | 0.035  | 0.036 | 0.977  | 0.329 |
| UNI4       | 0.350  | 0.033 | 10.661 | 0.000 |
| BENEV2     | -0.076 | 0.035 | -2.181 | 0.029 |
| SOCDESGEN8 | 0.010  | 0.033 | 0.310  | 0.756 |
| COVWORRY2  | 0.122  | 0.032 | 3.805  | 0.000 |
| OUTDOOR    | -0.034 | 0.031 | -1.113 | 0.266 |

#### MEAS\_OTH WITH

|            |       |       |        |       |
|------------|-------|-------|--------|-------|
| MEAS_SELF4 | 0.615 | 0.021 | 29.756 | 0.000 |
|------------|-------|-------|--------|-------|

#### STANDARDIZED TOTAL, TOTAL INDIRECT, SPECIFIC INDIRECT, AND DIRECT EFFECTS

#### STDYX Standardization

|          |      |           | Two-Tailed |  |
|----------|------|-----------|------------|--|
| Estimate | S.E. | Est./S.E. | P-Value    |  |

#### Effects from MEAS\_OTH to PBCL3

|                |        |       |        |       |
|----------------|--------|-------|--------|-------|
| Total          | 0.072  | 0.048 | 1.499  | 0.134 |
| Total indirect | -0.001 | 0.008 | -0.092 | 0.927 |

|                     |       |       |       |       |
|---------------------|-------|-------|-------|-------|
| Specific indirect 1 |       |       |       |       |
| PBCL3               |       |       |       |       |
| DISTCLIM            |       |       |       |       |
| MEAS_OTH            | 0.006 | 0.006 | 0.882 | 0.378 |

|                     |        |       |        |       |
|---------------------|--------|-------|--------|-------|
| Specific indirect 2 |        |       |        |       |
| PBCL3               |        |       |        |       |
| INTEROTH            |        |       |        |       |
| MEAS_OTH            | -0.006 | 0.005 | -1.284 | 0.199 |

|          |       |       |       |       |
|----------|-------|-------|-------|-------|
| Direct   |       |       |       |       |
| PBCL3    |       |       |       |       |
| MEAS_OTH | 0.072 | 0.048 | 1.508 | 0.132 |

#### Effects from MEAS\_SEL to PBCL3

|                |        |       |        |       |
|----------------|--------|-------|--------|-------|
| Total          | -0.035 | 0.049 | -0.711 | 0.477 |
| Total indirect | 0.001  | 0.006 | 0.128  | 0.898 |

|                     |        |       |        |       |
|---------------------|--------|-------|--------|-------|
| Specific indirect 1 |        |       |        |       |
| PBCL3               |        |       |        |       |
| DISTCLIM            |        |       |        |       |
| MEAS_SEL            | -0.003 | 0.004 | -0.838 | 0.402 |

|                     |       |       |       |       |
|---------------------|-------|-------|-------|-------|
| Specific indirect 2 |       |       |       |       |
| PBCL3               |       |       |       |       |
| INTEROTH            |       |       |       |       |
| MEAS_SEL            | 0.004 | 0.005 | 0.854 | 0.393 |

|          |        |       |        |       |
|----------|--------|-------|--------|-------|
| Direct   |        |       |        |       |
| PBCL3    |        |       |        |       |
| MEAS_SEL | -0.036 | 0.049 | -0.728 | 0.467 |

#### Effects from DISTCOV3 to PBCL3

|                |       |       |       |       |
|----------------|-------|-------|-------|-------|
| Total          | 0.041 | 0.035 | 1.181 | 0.237 |
| Total indirect | 0.017 | 0.009 | 2.038 | 0.042 |

|                     |       |       |       |       |
|---------------------|-------|-------|-------|-------|
| Specific indirect 1 |       |       |       |       |
| PBCL3               |       |       |       |       |
| DISTCLIM            |       |       |       |       |
| DISTCOV3            | 0.006 | 0.007 | 0.894 | 0.371 |

|                     |       |       |       |       |
|---------------------|-------|-------|-------|-------|
| Specific indirect 2 |       |       |       |       |
| PBCL3               |       |       |       |       |
| INTEROTH            |       |       |       |       |
| DISTCOV3            | 0.012 | 0.005 | 2.210 | 0.027 |

|          |       |       |       |       |
|----------|-------|-------|-------|-------|
| Direct   |       |       |       |       |
| PBCL3    |       |       |       |       |
| DISTCOV3 | 0.023 | 0.035 | 0.663 | 0.508 |

#### Effects from HYPCOVID to PBCL3

|                |       |       |       |       |
|----------------|-------|-------|-------|-------|
| Total          | 0.030 | 0.034 | 0.885 | 0.376 |
| Total indirect | 0.000 | 0.006 | 0.006 | 0.996 |

|                     |       |       |       |       |
|---------------------|-------|-------|-------|-------|
| Specific indirect 1 |       |       |       |       |
| PBCL3               |       |       |       |       |
| DISTCLIM            |       |       |       |       |
| HYPCOVID            | 0.004 | 0.004 | 0.881 | 0.378 |

|                     |        |       |        |       |
|---------------------|--------|-------|--------|-------|
| Specific indirect 2 |        |       |        |       |
| PBCL3               |        |       |        |       |
| INTEROTH            |        |       |        |       |
| HYPCOVID            | -0.004 | 0.003 | -1.120 | 0.263 |

|          |       |       |       |       |
|----------|-------|-------|-------|-------|
| Direct   |       |       |       |       |
| PBCL3    |       |       |       |       |
| HYPCOVID | 0.030 | 0.035 | 0.881 | 0.379 |

#### CONFIDENCE INTERVALS OF STANDARDIZED MODEL RESULTS

#### STDYX Standardization

Lower .5% Lower 2.5% Lower 5% Estimate Upper 5% Upper 2.5% Upper .5%

|            |        |        |        |        |        |        |        |
|------------|--------|--------|--------|--------|--------|--------|--------|
| PBCL3 ON   |        |        |        |        |        |        |        |
| INTEROTH6  | -0.194 | -0.172 | -0.160 | -0.101 | -0.042 | -0.030 | -0.008 |
| DISTCLIM6  | -0.070 | -0.044 | -0.031 | 0.038  | 0.106  | 0.119  | 0.145  |
| MEAS_OTH8  | -0.051 | -0.022 | -0.007 | 0.072  | 0.151  | 0.166  | 0.196  |
| MEAS_SELF4 | -0.162 | -0.132 | -0.116 | -0.036 | 0.045  | 0.060  | 0.091  |
| DISTCOV3   | -0.068 | -0.046 | -0.035 | 0.023  | 0.082  | 0.093  | 0.115  |
| HYPCOVID1  | -0.059 | -0.037 | -0.026 | 0.030  | 0.087  | 0.098  | 0.120  |
| AGE        | -0.170 | -0.147 | -0.135 | -0.071 | -0.008 | 0.004  | 0.028  |
| MALE       | -0.095 | -0.074 | -0.064 | -0.008 | 0.047  | 0.058  | 0.079  |
| CH_FR      | -0.081 | -0.056 | -0.043 | 0.023  | 0.089  | 0.102  | 0.127  |
| CH_ESP     | -0.227 | -0.203 | -0.190 | -0.127 | -0.063 | -0.051 | -0.027 |
| CH_UK      | -0.266 | -0.241 | -0.228 | -0.160 | -0.092 | -0.079 | -0.054 |
| SYMPERS2   | -0.143 | -0.123 | -0.112 | -0.056 | -0.001 | 0.010  | 0.030  |
| SYMPOTHER2 | -0.109 | -0.088 | -0.077 | -0.021 | 0.035  | 0.046  | 0.067  |
| CONSERV6   | -0.040 | -0.014 | -0.001 | 0.068  | 0.137  | 0.150  | 0.176  |
| UNI4       | -0.086 | -0.060 | -0.047 | 0.022  | 0.090  | 0.103  | 0.129  |
| BENEV2     | -0.084 | -0.061 | -0.049 | 0.014  | 0.076  | 0.088  | 0.111  |

|            |        |        |        |        |        |       |       |
|------------|--------|--------|--------|--------|--------|-------|-------|
| SOCDESGEN8 | -0.055 | -0.031 | -0.019 | 0.043  | 0.105  | 0.117 | 0.141 |
| SOCDESENV4 | -0.086 | -0.064 | -0.053 | 0.005  | 0.063  | 0.074 | 0.096 |
| COVWORRY2  | -0.169 | -0.146 | -0.134 | -0.072 | -0.011 | 0.001 | 0.024 |
| OUTDOOR    | -0.122 | -0.102 | -0.091 | -0.037 | 0.017  | 0.027 | 0.047 |
| CHANGEOP   | -0.158 | -0.133 | -0.121 | -0.056 | 0.009  | 0.021 | 0.045 |

#### INTEROTH ON

|            |        |        |        |        |        |        |        |
|------------|--------|--------|--------|--------|--------|--------|--------|
| MEAS_OTH8  | -0.049 | -0.022 | -0.009 | 0.063  | 0.135  | 0.149  | 0.176  |
| MEAS_SELF4 | -0.156 | -0.128 | -0.114 | -0.040 | 0.034  | 0.048  | 0.075  |
| DISTCOV3   | -0.196 | -0.176 | -0.166 | -0.114 | -0.062 | -0.052 | -0.033 |
| HYPCOVID1  | -0.043 | -0.023 | -0.013 | 0.039  | 0.090  | 0.100  | 0.120  |
| AGE        | -0.095 | -0.073 | -0.062 | -0.004 | 0.054  | 0.065  | 0.087  |
| MALE       | -0.006 | 0.013  | 0.022  | 0.073  | 0.124  | 0.133  | 0.152  |
| CH_FR      | -0.238 | -0.215 | -0.204 | -0.144 | -0.084 | -0.072 | -0.050 |
| CH_ESP     | -0.204 | -0.182 | -0.171 | -0.112 | -0.054 | -0.043 | -0.021 |
| CH_UK      | -0.087 | -0.063 | -0.051 | 0.011  | 0.074  | 0.086  | 0.109  |
| SYMPERS2   | -0.146 | -0.127 | -0.118 | -0.067 | -0.016 | -0.006 | 0.013  |
| SYMPOTHER2 | -0.013 | 0.006  | 0.016  | 0.067  | 0.119  | 0.129  | 0.148  |
| CONSERV6   | -0.026 | -0.003 | 0.009  | 0.072  | 0.135  | 0.147  | 0.171  |
| UNI4       | -0.037 | -0.015 | -0.004 | 0.055  | 0.114  | 0.126  | 0.148  |
| BENEV2     | 0.122  | 0.143  | 0.153  | 0.208  | 0.264  | 0.274  | 0.295  |
| SOCDESGEN8 | -0.054 | -0.033 | -0.023 | 0.034  | 0.090  | 0.101  | 0.122  |
| SOCDESENV4 | -0.115 | -0.095 | -0.085 | -0.032 | 0.021  | 0.031  | 0.051  |
| COVWORRY2  | 0.169  | 0.189  | 0.200  | 0.253  | 0.307  | 0.317  | 0.338  |
| OUTDOOR    | -0.016 | 0.003  | 0.012  | 0.062  | 0.111  | 0.121  | 0.139  |
| CHANGEOP   | -0.023 | -0.002 | 0.008  | 0.063  | 0.118  | 0.129  | 0.149  |

#### DISTCLIM ON

|            |        |        |        |        |        |        |        |
|------------|--------|--------|--------|--------|--------|--------|--------|
| MEAS_OTH8  | 0.051  | 0.074  | 0.086  | 0.149  | 0.212  | 0.224  | 0.248  |
| MEAS_SELF4 | -0.188 | -0.164 | -0.151 | -0.087 | -0.023 | -0.010 | 0.014  |
| DISTCOV3   | 0.087  | 0.104  | 0.113  | 0.158  | 0.203  | 0.212  | 0.229  |
| HYPCOVID1  | 0.033  | 0.050  | 0.059  | 0.104  | 0.149  | 0.158  | 0.175  |
| AGE        | -0.134 | -0.115 | -0.105 | -0.055 | -0.004 | 0.005  | 0.024  |
| MALE       | -0.105 | -0.088 | -0.080 | -0.036 | 0.008  | 0.017  | 0.033  |
| CH_FR      | -0.074 | -0.054 | -0.044 | 0.008  | 0.061  | 0.071  | 0.091  |
| CH_ESP     | -0.047 | -0.028 | -0.018 | 0.033  | 0.084  | 0.093  | 0.112  |
| CH_UK      | -0.034 | -0.013 | -0.003 | 0.052  | 0.106  | 0.116  | 0.137  |
| SYMPERS2   | -0.076 | -0.060 | -0.051 | -0.007 | 0.038  | 0.046  | 0.063  |
| SYMPOTHER2 | -0.101 | -0.084 | -0.076 | -0.031 | 0.014  | 0.022  | 0.039  |
| CONSERV6   | -0.179 | -0.159 | -0.148 | -0.093 | -0.038 | -0.027 | -0.007 |
| UNI4       | 0.263  | 0.282  | 0.292  | 0.342  | 0.392  | 0.401  | 0.420  |
| BENEV2     | -0.139 | -0.121 | -0.111 | -0.063 | -0.014 | -0.004 | 0.014  |
| SOCDESGEN8 | -0.233 | -0.215 | -0.205 | -0.157 | -0.108 | -0.098 | -0.080 |
| SOCDESENV4 | -0.001 | 0.016  | 0.025  | 0.071  | 0.117  | 0.126  | 0.143  |
| COVWORRY2  | -0.110 | -0.092 | -0.083 | -0.035 | 0.013  | 0.022  | 0.040  |
| OUTDOOR    | -0.057 | -0.041 | -0.033 | 0.010  | 0.053  | 0.061  | 0.077  |
| CHANGEOP   | 0.259  | 0.277  | 0.286  | 0.333  | 0.380  | 0.389  | 0.407  |

#### MEAS\_OTH ON

|     |        |        |       |       |       |       |       |
|-----|--------|--------|-------|-------|-------|-------|-------|
| AGE | -0.022 | -0.002 | 0.009 | 0.063 | 0.118 | 0.128 | 0.149 |
|-----|--------|--------|-------|-------|-------|-------|-------|

|            |        |        |        |        |        |        |       |
|------------|--------|--------|--------|--------|--------|--------|-------|
| MALE       | -0.139 | -0.121 | -0.111 | -0.062 | -0.013 | -0.004 | 0.014 |
| CH_FR      | -0.132 | -0.110 | -0.099 | -0.040 | 0.018  | 0.029  | 0.051 |
| CH_ESP     | -0.165 | -0.144 | -0.133 | -0.076 | -0.020 | -0.009 | 0.012 |
| CH_UK      | -0.094 | -0.071 | -0.060 | 0.000  | 0.059  | 0.071  | 0.093 |
| SYMPERS2   | -0.026 | -0.008 | 0.002  | 0.051  | 0.101  | 0.110  | 0.128 |
| SYMPOTHER2 | 0.015  | 0.034  | 0.043  | 0.092  | 0.141  | 0.151  | 0.169 |
| CONSERV6   | 0.301  | 0.321  | 0.332  | 0.385  | 0.439  | 0.449  | 0.469 |
| UNI4       | -0.003 | 0.018  | 0.028  | 0.082  | 0.135  | 0.146  | 0.166 |
| BENEV2     | -0.043 | -0.022 | -0.012 | 0.042  | 0.097  | 0.107  | 0.127 |
| SOCDESGEN8 | -0.157 | -0.137 | -0.127 | -0.075 | -0.024 | -0.014 | 0.006 |
| COVWORRY2  | 0.078  | 0.096  | 0.106  | 0.156  | 0.206  | 0.216  | 0.235 |
| OUTDOOR    | -0.105 | -0.087 | -0.077 | -0.029 | 0.019  | 0.028  | 0.046 |

#### MEAS\_SEL ON

|            |        |        |        |        |        |        |        |
|------------|--------|--------|--------|--------|--------|--------|--------|
| AGE        | 0.131  | 0.150  | 0.160  | 0.212  | 0.264  | 0.274  | 0.294  |
| MALE       | -0.151 | -0.133 | -0.124 | -0.077 | -0.030 | -0.021 | -0.003 |
| CH_FR      | -0.121 | -0.100 | -0.089 | -0.033 | 0.024  | 0.034  | 0.055  |
| CH_ESP     | -0.159 | -0.139 | -0.128 | -0.074 | -0.019 | -0.009 | 0.011  |
| CH_UK      | -0.096 | -0.075 | -0.064 | -0.006 | 0.051  | 0.062  | 0.083  |
| SYMPERS2   | -0.081 | -0.063 | -0.054 | -0.006 | 0.041  | 0.050  | 0.068  |
| SYMPOTHER2 | -0.063 | -0.045 | -0.036 | 0.011  | 0.059  | 0.068  | 0.086  |
| CONSERV6   | 0.323  | 0.342  | 0.352  | 0.403  | 0.454  | 0.464  | 0.483  |
| UNI4       | -0.073 | -0.054 | -0.044 | 0.008  | 0.059  | 0.069  | 0.089  |
| BENEV2     | -0.033 | -0.013 | -0.003 | 0.049  | 0.101  | 0.111  | 0.131  |
| SOCDESGEN8 | -0.078 | -0.059 | -0.049 | 0.001  | 0.051  | 0.060  | 0.079  |
| COVWORRY2  | 0.083  | 0.101  | 0.111  | 0.159  | 0.207  | 0.216  | 0.235  |
| OUTDOOR    | -0.090 | -0.073 | -0.064 | -0.018 | 0.029  | 0.038  | 0.055  |

#### DISTCOV3 ON

|            |        |        |        |        |        |        |        |
|------------|--------|--------|--------|--------|--------|--------|--------|
| AGE        | -0.059 | -0.037 | -0.026 | 0.033  | 0.092  | 0.104  | 0.126  |
| MALE       | -0.077 | -0.058 | -0.047 | 0.006  | 0.059  | 0.069  | 0.089  |
| CH_FR      | -0.026 | -0.002 | 0.010  | 0.073  | 0.137  | 0.149  | 0.172  |
| CH_ESP     | -0.026 | -0.003 | 0.009  | 0.070  | 0.131  | 0.143  | 0.166  |
| CH_UK      | 0.107  | 0.131  | 0.143  | 0.207  | 0.271  | 0.283  | 0.307  |
| SYMPERS2   | -0.019 | 0.001  | 0.011  | 0.064  | 0.118  | 0.128  | 0.148  |
| SYMPOTHER2 | -0.014 | 0.006  | 0.016  | 0.069  | 0.123  | 0.133  | 0.153  |
| CONSERV6   | -0.063 | -0.041 | -0.029 | 0.032  | 0.092  | 0.104  | 0.127  |
| UNI4       | -0.030 | -0.008 | 0.003  | 0.061  | 0.120  | 0.131  | 0.153  |
| BENEV2     | -0.055 | -0.033 | -0.021 | 0.037  | 0.096  | 0.108  | 0.130  |
| SOCDESGEN8 | -0.226 | -0.205 | -0.194 | -0.138 | -0.082 | -0.072 | -0.051 |
| COVWORRY2  | 0.124  | 0.144  | 0.154  | 0.208  | 0.262  | 0.272  | 0.293  |
| OUTDOOR    | -0.045 | -0.026 | -0.016 | 0.037  | 0.089  | 0.099  | 0.118  |

#### HYPCOVID ON

|          |        |        |        |        |        |       |       |
|----------|--------|--------|--------|--------|--------|-------|-------|
| AGE      | -0.164 | -0.141 | -0.130 | -0.070 | -0.010 | 0.002 | 0.024 |
| MALE     | -0.043 | -0.023 | -0.013 | 0.040  | 0.094  | 0.104 | 0.124 |
| CH_FR    | -0.151 | -0.127 | -0.115 | -0.051 | 0.013  | 0.025 | 0.049 |
| CH_ESP   | -0.110 | -0.087 | -0.075 | -0.014 | 0.048  | 0.060 | 0.083 |
| CH_UK    | 0.056  | 0.080  | 0.093  | 0.157  | 0.222  | 0.235 | 0.259 |
| SYMPERS2 | -0.111 | -0.091 | -0.080 | -0.027 | 0.027  | 0.037 | 0.058 |

|            |        |        |        |       |       |       |       |
|------------|--------|--------|--------|-------|-------|-------|-------|
| SYMPOTHER2 | -0.033 | -0.013 | -0.003 | 0.051 | 0.105 | 0.115 | 0.135 |
| CONSERV6   | 0.050  | 0.072  | 0.084  | 0.145 | 0.206 | 0.217 | 0.240 |
| UNI4       | -0.053 | -0.031 | -0.020 | 0.039 | 0.098 | 0.109 | 0.131 |
| BENEV2     | -0.092 | -0.070 | -0.058 | 0.001 | 0.061 | 0.072 | 0.095 |
| SOCDESGEN8 | -0.054 | -0.033 | -0.022 | 0.035 | 0.092 | 0.102 | 0.124 |
| COVWORRY2  | 0.149  | 0.169  | 0.179  | 0.233 | 0.287 | 0.297 | 0.317 |
| OUTDOOR    | -0.060 | -0.040 | -0.030 | 0.023 | 0.075 | 0.086 | 0.105 |

#### CHANGEOP ON

|            |        |        |        |        |        |        |        |
|------------|--------|--------|--------|--------|--------|--------|--------|
| AGE        | -0.095 | -0.073 | -0.062 | -0.005 | 0.053  | 0.064  | 0.085  |
| MALE       | -0.176 | -0.156 | -0.147 | -0.095 | -0.044 | -0.034 | -0.015 |
| CH_FR      | -0.023 | 0.000  | 0.011  | 0.073  | 0.134  | 0.146  | 0.169  |
| CH_ESP     | -0.014 | 0.008  | 0.019  | 0.079  | 0.138  | 0.149  | 0.172  |
| CH_UK      | -0.147 | -0.124 | -0.112 | -0.049 | 0.013  | 0.025  | 0.048  |
| SYMPERS2   | -0.078 | -0.058 | -0.048 | 0.004  | 0.056  | 0.066  | 0.086  |
| SYMPOTHER2 | -0.149 | -0.130 | -0.120 | -0.068 | -0.016 | -0.006 | 0.013  |
| CONSERV6   | -0.057 | -0.035 | -0.024 | 0.035  | 0.094  | 0.105  | 0.127  |
| UNI4       | 0.265  | 0.285  | 0.296  | 0.350  | 0.404  | 0.414  | 0.434  |
| BENEV2     | -0.166 | -0.145 | -0.134 | -0.076 | -0.019 | -0.008 | 0.014  |
| SOCDESGEN8 | -0.075 | -0.055 | -0.044 | 0.010  | 0.065  | 0.075  | 0.096  |
| COVWORRY2  | 0.039  | 0.059  | 0.069  | 0.122  | 0.175  | 0.185  | 0.204  |
| OUTDOOR    | -0.113 | -0.094 | -0.085 | -0.034 | 0.016  | 0.026  | 0.045  |

#### MEAS\_OTH WITH

|            |       |       |       |       |       |       |       |
|------------|-------|-------|-------|-------|-------|-------|-------|
| MEAS_SELF4 | 0.562 | 0.574 | 0.581 | 0.615 | 0.649 | 0.655 | 0.668 |
|------------|-------|-------|-------|-------|-------|-------|-------|

#### Intercepts

#### CONFIDENCE INTERVALS OF STANDARDIZED TOTAL, TOTAL INDIRECT, SPECIFIC INDIRECT, AND DIRECT EFFECTS

#### STDYX Standardization

Lower .5% Lower 2.5% Lower 5% Estimate Upper 5% Upper 2.5% Upper .5%

#### Effects from MEAS\_OTH to PBCL3

|                |        |        |        |        |       |       |       |
|----------------|--------|--------|--------|--------|-------|-------|-------|
| Total          | -0.051 | -0.022 | -0.007 | 0.072  | 0.150 | 0.165 | 0.195 |
| Total indirect | -0.021 | -0.016 | -0.014 | -0.001 | 0.012 | 0.015 | 0.020 |

#### Specific indirect 1

PBCL3

DISTCLIM

|          |        |        |        |       |       |       |       |
|----------|--------|--------|--------|-------|-------|-------|-------|
| MEAS_OTH | -0.011 | -0.007 | -0.005 | 0.006 | 0.016 | 0.018 | 0.022 |
|----------|--------|--------|--------|-------|-------|-------|-------|

#### Specific indirect 2

PBCL3

INTEROTH

|          |        |        |        |        |       |       |       |
|----------|--------|--------|--------|--------|-------|-------|-------|
| MEAS_OTH | -0.019 | -0.016 | -0.015 | -0.006 | 0.002 | 0.003 | 0.006 |
| Direct   |        |        |        |        |       |       |       |
| PBCL3    |        |        |        |        |       |       |       |
| MEAS_OTH | -0.051 | -0.022 | -0.007 | 0.072  | 0.151 | 0.166 | 0.196 |

#### Effects from MEAS\_SEL to PBCL3

|                     |        |        |        |        |       |       |       |
|---------------------|--------|--------|--------|--------|-------|-------|-------|
| Total               | -0.162 | -0.131 | -0.116 | -0.035 | 0.046 | 0.061 | 0.092 |
| Total indirect      | -0.015 | -0.011 | -0.009 | 0.001  | 0.011 | 0.013 | 0.017 |
| Specific indirect 1 |        |        |        |        |       |       |       |
| PBCL3               |        |        |        |        |       |       |       |
| DISTCLIM            |        |        |        |        |       |       |       |
| MEAS_SEL            | -0.013 | -0.011 | -0.010 | -0.003 | 0.003 | 0.004 | 0.007 |
| Specific indirect 2 |        |        |        |        |       |       |       |
| PBCL3               |        |        |        |        |       |       |       |
| INTEROTH            |        |        |        |        |       |       |       |
| MEAS_SEL            | -0.008 | -0.005 | -0.004 | 0.004  | 0.012 | 0.013 | 0.016 |
| Direct              |        |        |        |        |       |       |       |
| PBCL3               |        |        |        |        |       |       |       |
| MEAS_SEL            | -0.162 | -0.132 | -0.116 | -0.036 | 0.045 | 0.060 | 0.091 |

#### Effects from DISTCOV3 to PBCL3

|                     |        |        |        |       |       |       |       |
|---------------------|--------|--------|--------|-------|-------|-------|-------|
| Total               | -0.048 | -0.027 | -0.016 | 0.041 | 0.098 | 0.109 | 0.130 |
| Total indirect      | -0.005 | 0.001  | 0.003  | 0.017 | 0.032 | 0.034 | 0.040 |
| Specific indirect 1 |        |        |        |       |       |       |       |
| PBCL3               |        |        |        |       |       |       |       |
| DISTCLIM            |        |        |        |       |       |       |       |
| DISTCOV3            | -0.011 | -0.007 | -0.005 | 0.006 | 0.017 | 0.019 | 0.023 |
| Specific indirect 2 |        |        |        |       |       |       |       |
| PBCL3               |        |        |        |       |       |       |       |
| INTEROTH            |        |        |        |       |       |       |       |
| DISTCOV3            | -0.002 | 0.001  | 0.003  | 0.012 | 0.020 | 0.022 | 0.025 |
| Direct              |        |        |        |       |       |       |       |
| PBCL3               |        |        |        |       |       |       |       |
| DISTCOV3            | -0.068 | -0.046 | -0.035 | 0.023 | 0.082 | 0.093 | 0.115 |

#### Effects from HYPCOVID to PBCL3

|       |        |        |        |       |       |       |       |
|-------|--------|--------|--------|-------|-------|-------|-------|
| Total | -0.058 | -0.037 | -0.026 | 0.030 | 0.087 | 0.098 | 0.119 |
|-------|--------|--------|--------|-------|-------|-------|-------|

|                     |        |        |        |        |       |       |       |
|---------------------|--------|--------|--------|--------|-------|-------|-------|
| Total indirect      | -0.014 | -0.011 | -0.009 | 0.000  | 0.009 | 0.011 | 0.014 |
| Specific indirect 1 |        |        |        |        |       |       |       |
| PBCL3               |        |        |        |        |       |       |       |
| DISTCLIM            |        |        |        |        |       |       |       |
| HYPCOVID            | -0.008 | -0.005 | -0.003 | 0.004  | 0.011 | 0.013 | 0.015 |
| Specific indirect 2 |        |        |        |        |       |       |       |
| PBCL3               |        |        |        |        |       |       |       |
| INTEROTH            |        |        |        |        |       |       |       |
| HYPCOVID            | -0.013 | -0.011 | -0.010 | -0.004 | 0.002 | 0.003 | 0.005 |
| Direct              |        |        |        |        |       |       |       |
| PBCL3               |        |        |        |        |       |       |       |
| HYPCOVID            | -0.059 | -0.037 | -0.026 | 0.030  | 0.087 | 0.098 | 0.120 |
